# Supplementary material for: NanoPipe—a web server for nanopore MinION sequencing data analysis
Source: PubMed Central journal article supplement (PMC6377397; doi:10.1093/gigascience/giy169), 2019-01-24

|                                                      |                                                                                                                                                                                                                                                                                                                                                                                                                                                                                                                                                                                                                                                                                                                                                                                                                                                                                                                                                                                                                                                                                                                                                                                                                                                                                                                                                                                                                                                                                                                                                                                                                                                                                                                                                                                                                                                                                                                                                              |                         |
|------------------------------------------------------|--------------------------------------------------------------------------------------------------------------------------------------------------------------------------------------------------------------------------------------------------------------------------------------------------------------------------------------------------------------------------------------------------------------------------------------------------------------------------------------------------------------------------------------------------------------------------------------------------------------------------------------------------------------------------------------------------------------------------------------------------------------------------------------------------------------------------------------------------------------------------------------------------------------------------------------------------------------------------------------------------------------------------------------------------------------------------------------------------------------------------------------------------------------------------------------------------------------------------------------------------------------------------------------------------------------------------------------------------------------------------------------------------------------------------------------------------------------------------------------------------------------------------------------------------------------------------------------------------------------------------------------------------------------------------------------------------------------------------------------------------------------------------------------------------------------------------------------------------------------------------------------------------------------------------------------------------------------|-------------------------|
| <b>Manuscript Number:</b>                            | GIGA-D-18-00394                                                                                                                                                                                                                                                                                                                                                                                                                                                                                                                                                                                                                                                                                                                                                                                                                                                                                                                                                                                                                                                                                                                                                                                                                                                                                                                                                                                                                                                                                                                                                                                                                                                                                                                                                                                                                                                                                                                                              |                         |
| <b>Full Title:</b>                                   | NanoPipe - a web server for nanopore MinION sequencing data analysis                                                                                                                                                                                                                                                                                                                                                                                                                                                                                                                                                                                                                                                                                                                                                                                                                                                                                                                                                                                                                                                                                                                                                                                                                                                                                                                                                                                                                                                                                                                                                                                                                                                                                                                                                                                                                                                                                         |                         |
| <b>Article Type:</b>                                 | Technical Note                                                                                                                                                                                                                                                                                                                                                                                                                                                                                                                                                                                                                                                                                                                                                                                                                                                                                                                                                                                                                                                                                                                                                                                                                                                                                                                                                                                                                                                                                                                                                                                                                                                                                                                                                                                                                                                                                                                                               |                         |
| <b>Funding Information:</b>                          | Medizinische Fakultät, Westfälische Wilhelms-Universität Münster (n/a)                                                                                                                                                                                                                                                                                                                                                                                                                                                                                                                                                                                                                                                                                                                                                                                                                                                                                                                                                                                                                                                                                                                                                                                                                                                                                                                                                                                                                                                                                                                                                                                                                                                                                                                                                                                                                                                                                       | Dr. Wojciech Makalowski |
| <b>Abstract:</b>                                     | <p><b>Background</b></p> <p>The fast-moving progress of the third generation long read sequencing technologies will soon bring the biological and medical sciences to a new era of research. Altogether the technique and experimental procedures are becoming more straightforward and available to biologists from diverse fields, even without any profound experience in DNA sequencing. Thus, the introduction of the MinION™ device by Oxford Nanopore Technologies promises to “bring sequencing technology to the masses” and also allows quick and operative analysis in field studies. However, the convenience of this sequencing technology dramatically contrasts with the available analysis tools, which may significantly reduce enthusiasm of a “regular” user. To really bring the sequencing technology to every biologist, we need a set of user-friendly tools that can perform a powerful analysis in an automatic manner.</p> <p><b>Findings</b></p> <p>NanoPipe was developed in consideration of the specifics of the MinION™ sequencing technologies, providing accordingly adjusted alignment parameters. The range of the target species/sequences for the alignment is not limited, and the descriptive usage page of NanoPipe helps a user to succeed with NanoPipe analysis. The results contain alignment statistics, consensus sequence, polymorphisms data, and visualization of the alignment. Several test cases are used to demonstrate efficiency of the tool.</p> <p><b>Conclusions</b></p> <p>Freely available NanoPipe software allows effortless and reliable analysis of MinION™ sequencing data for experienced bioinformaticians, as well for wet-lab biologists with minimum bioinformatics knowledge. Moreover, for the latter group, we describe the basic algorithm of actions necessary for MinION™ sequencing analysis from the first to last step.</p> <p><b>Issue Section</b></p> <p>TECHNICAL NOTE</p> |                         |
| <b>Corresponding Author:</b>                         | Wojciech Makalowski<br>Univeristy of Münster<br>Münster, GERMANY                                                                                                                                                                                                                                                                                                                                                                                                                                                                                                                                                                                                                                                                                                                                                                                                                                                                                                                                                                                                                                                                                                                                                                                                                                                                                                                                                                                                                                                                                                                                                                                                                                                                                                                                                                                                                                                                                             |                         |
| <b>Corresponding Author Secondary Information:</b>   |                                                                                                                                                                                                                                                                                                                                                                                                                                                                                                                                                                                                                                                                                                                                                                                                                                                                                                                                                                                                                                                                                                                                                                                                                                                                                                                                                                                                                                                                                                                                                                                                                                                                                                                                                                                                                                                                                                                                                              |                         |
| <b>Corresponding Author's Institution:</b>           | Univeristy of Münster                                                                                                                                                                                                                                                                                                                                                                                                                                                                                                                                                                                                                                                                                                                                                                                                                                                                                                                                                                                                                                                                                                                                                                                                                                                                                                                                                                                                                                                                                                                                                                                                                                                                                                                                                                                                                                                                                                                                        |                         |
| <b>Corresponding Author's Secondary Institution:</b> |                                                                                                                                                                                                                                                                                                                                                                                                                                                                                                                                                                                                                                                                                                                                                                                                                                                                                                                                                                                                                                                                                                                                                                                                                                                                                                                                                                                                                                                                                                                                                                                                                                                                                                                                                                                                                                                                                                                                                              |                         |
| <b>First Author:</b>                                 | Victoria Shabardina                                                                                                                                                                                                                                                                                                                                                                                                                                                                                                                                                                                                                                                                                                                                                                                                                                                                                                                                                                                                                                                                                                                                                                                                                                                                                                                                                                                                                                                                                                                                                                                                                                                                                                                                                                                                                                                                                                                                          |                         |
| <b>First Author Secondary Information:</b>           |                                                                                                                                                                                                                                                                                                                                                                                                                                                                                                                                                                                                                                                                                                                                                                                                                                                                                                                                                                                                                                                                                                                                                                                                                                                                                                                                                                                                                                                                                                                                                                                                                                                                                                                                                                                                                                                                                                                                                              |                         |
| <b>Order of Authors:</b>                             | Victoria Shabardina                                                                                                                                                                                                                                                                                                                                                                                                                                                                                                                                                                                                                                                                                                                                                                                                                                                                                                                                                                                                                                                                                                                                                                                                                                                                                                                                                                                                                                                                                                                                                                                                                                                                                                                                                                                                                                                                                                                                          |                         |

|                                                                                                                                                                                                                                                                                                                                                                                                                                                                                                                                     |                     |
|-------------------------------------------------------------------------------------------------------------------------------------------------------------------------------------------------------------------------------------------------------------------------------------------------------------------------------------------------------------------------------------------------------------------------------------------------------------------------------------------------------------------------------------|---------------------|
|                                                                                                                                                                                                                                                                                                                                                                                                                                                                                                                                     | Tabea Kischka       |
|                                                                                                                                                                                                                                                                                                                                                                                                                                                                                                                                     | Felix Manske        |
|                                                                                                                                                                                                                                                                                                                                                                                                                                                                                                                                     | Norbert Grundmann   |
|                                                                                                                                                                                                                                                                                                                                                                                                                                                                                                                                     | Martin C. Frith     |
|                                                                                                                                                                                                                                                                                                                                                                                                                                                                                                                                     | Yutaka Suzuki       |
|                                                                                                                                                                                                                                                                                                                                                                                                                                                                                                                                     | Wojciech Makalowski |
| <b>Order of Authors Secondary Information:</b>                                                                                                                                                                                                                                                                                                                                                                                                                                                                                      |                     |
| <b>Additional Information:</b>                                                                                                                                                                                                                                                                                                                                                                                                                                                                                                      |                     |
| <b>Question</b>                                                                                                                                                                                                                                                                                                                                                                                                                                                                                                                     | <b>Response</b>     |
| Are you submitting this manuscript to a special series or article collection?                                                                                                                                                                                                                                                                                                                                                                                                                                                       | No                  |
| <p><b>Experimental design and statistics</b></p> <p>Full details of the experimental design and statistical methods used should be given in the Methods section, as detailed in our <a href="#">Minimum Standards Reporting Checklist</a>. Information essential to interpreting the data presented should be made available in the figure legends.</p> <p>Have you included all the information requested in your manuscript?</p>                                                                                                  | Yes                 |
| <p><b>Resources</b></p> <p>A description of all resources used, including antibodies, cell lines, animals and software tools, with enough information to allow them to be uniquely identified, should be included in the Methods section. Authors are strongly encouraged to cite <a href="#">Research Resource Identifiers</a> (RRIDs) for antibodies, model organisms and tools, where possible.</p> <p>Have you included the information requested as detailed in our <a href="#">Minimum Standards Reporting Checklist</a>?</p> | Yes                 |
| <p><b>Availability of data and materials</b></p> <p>All datasets and code on which the</p>                                                                                                                                                                                                                                                                                                                                                                                                                                          | Yes                 |

conclusions of the paper rely must be either included in your submission or deposited in [publicly available repositories](#) (where available and ethically appropriate), referencing such data using a unique identifier in the references and in the “Availability of Data and Materials” section of your manuscript.

Have you have met the above requirement as detailed in our [Minimum Standards Reporting Checklist](#)?

1  
2  
3  
4  
5  
6  
7  
8  
9  
10  
11  
12  
13  
14  
15  
16  
17  
18  
19  
20  
21  
22  
23  
24  
25  
26  
27  
28  
29  
30  
31  
32  
33  
34  
35  
36  
37  
38  
39  
40  
41  
42  
43  
44  
45  
46  
47  
48  
49  
50  
51  
52  
53  
54  
55  
56  
57  
58  
59  
60  
61  
62  
63  
64  
65

# NanoPipe - a web server for nanopore MinION sequencing data analysis

Victoria Shabardina<sup>1</sup>, Tabea Kischka<sup>1</sup>, Felix Manske<sup>1</sup>, Norbert Grundmann<sup>1</sup>, Martin C.

Frith<sup>2,3,4</sup>, Yutaka Suzuki<sup>5</sup>, and Wojciech Makalowski<sup>1</sup>

<sup>1</sup> Institute of Bioinformatics, University of Muenster, Germany

<sup>2</sup> Artificial Intelligence Research Center, AIST, Japan

<sup>3</sup> Department of Computational Biology and Medical Sciences, The University of Tokyo, Japan

<sup>4</sup> AIST-Waseda University Computational Bio Big Data Open Innovation Laboratory, Japan

<sup>5</sup> Laboratory of Systems Genomics, Department of Computational Biology and Medical Sciences, The University of Tokyo

Corresponding author: Wojciech Makalowski, [wojmak@uni-muenster.de](mailto:wojmak@uni-muenster.de)

18 **Abstract**

1  
2 19 *Background:* The fast-moving progress of the third generation long read sequencing  
3  
4  
5 20 technologies will soon bring the biological and medical sciences to a new era of research.  
6  
7 21 Altogether the technique and experimental procedures are becoming more  
8  
9  
10 22 straightforward and available to biologists from diverse fields, even without any profound  
11  
12 23 experience in DNA sequencing. Thus, the introduction of the MinION™ device by Oxford  
13  
14  
15 24 Nanopore Technologies promises to “bring sequencing technology to the masses” and also  
16  
17 25 allows quick and operative analysis in field studies. However, the convenience of this  
18  
19  
20 26 sequencing technology dramatically contrasts with the available analysis tools, which may  
21  
22 27 significantly reduce enthusiasm of a “regular” user. To really bring the sequencing  
23  
24  
25 28 technology to every biologist, we need a set of user-friendly tools that can perform a  
26  
27 29 powerful analysis in an automatic manner.

28  
29  
30 30 *Findings:* NanoPipe was developed in consideration of the specifics of the MinION™  
31  
32  
33 31 sequencing technologies, providing accordingly adjusted alignment parameters. The range  
34  
35  
36 32 of the target species/sequences for the alignment is not limited, and the descriptive usage  
37  
38 33 page of NanoPipe helps a user to succeed with NanoPipe analysis. The results contain  
39  
40  
41 34 alignment statistics, consensus sequence, polymorphisms data, and visualization of the  
42  
43 35 alignment. Several test cases are used to demonstrate efficiency of the tool.

44  
45  
46 36 *Conclusions:* Freely available NanoPipe software allows effortless and reliable analysis of  
47  
48  
49 37 MinION™ sequencing data for experienced bioinformaticians, as well for wet-lab biologists  
50  
51  
52 38 with minimum bioinformatics knowledge. Moreover, for the latter group, we describe the  
53  
54 39 basic algorithm of actions necessary for MinION™ sequencing analysis from the first to last  
55  
56 40 step.

57  
58  
59  
60 41 **Issue Section:** [TECHNICAL NOTE](#)

42 *Keywords:* sequencing technologies, long reads sequencing, bioinformatics software,  
43 MinION, Oxford Nanopore

## 45 **Background**

46 Recent years have witnessed a DNA sequencing boom due to the constantly improving  
47 technologies and, consequently, the accessibility of sequencing to a large spectrum of  
48 customers including scientists and medical practitioners. Researchers in many fields, from  
49 metagenomics to plant physiology to medicine have been implementing sequencing  
50 experiments into their research. Oxford Nanopore Technologies (ONT) essentially  
51 accelerated this process by introducing the MinION™ sequencer, a portable device with  
52 minimum requirements for technical skills and bioinformatics knowledge. Thus, DNA  
53 sequencing experiments became feasible even in field studies, in small laboratories and  
54 soon will be available for medical applications in clinics [1].

55 The NCBI PubMed database includes 261 scientific articles containing “Oxford Nanopore”  
56 phrase published between 2009 and 2018 (by September 1, 2018), the majority of which  
57 were published in the last three years (see Fig. S1 in Supplementary). This is pointing, both,  
58 at the increased popularity of the ONT sequencers and at the considerable improvement of  
59 the technology and sequencing quality in the last three years. High throughput and long  
60 reads allow diverse applications of MinION™: virology [2], [3], plant pathology and  
61 agriculture [4], [5], tuberculosis studies [6], metagenomics and diet [7], veterinary research  
62 [8]; and as a portable platform: field biodiversity studies [9], detection of Ebola virus in  
63 patients on the spot [10], [11], sequencing in space [12]. Not to forget fundamental  
64 applications for long read sequencing studies, such as de novo genome assembly,  
65 improvement of existing genome assemblies and discovery of structural variants and long  
66 repeats [13]–[16]. ONT sequencing is favorable for microbiology research as small-sized

67 bacterial genomes can be covered in just one MinION™ read [17], [18], thus providing high  
68 resolution in genome architecture.

69 ONT supplies its users with the necessary software to perform base calling, i.e. converting  
70 of MinION™'s electrical signals into a sequence of nucleotides: the on-run MinKNOW and  
71 offline Albacore. Both applications utilize the complex, recurrent neural network (RNN)  
72 algorithm, which is recently very popular in computer science. It allows the software to  
73 learn from existing data and improve its performance. The output is a collection of FAST5  
74 and/or FASTQ files containing the base-called sequences. These are the files that are used  
75 for any sequence analysis in bioinformatics, thus, the base-caller can be called a “gate” from  
76 MinION™ into data interpretation. Nevertheless, the range of ONT provided analysis tools  
77 is limited, and concerns only specific applications, excluding general processing, which is  
78 left to the user. For example, the EPI2ME software suite by ONT includes applications for  
79 barcode analysis, metagenomics and antimicrobial resistance analyses and some technical  
80 tests [19]. Several research groups have been recently focusing on the development of  
81 MinION™ specific bioinformatics tools [20]–[22], although most of these require  
82 considerable bioinformatics knowledge. These conditions impede benefits that MinION™  
83 based DNA sequencing could bring to medical practitioners and researchers with less IT  
84 experience. To fill this gap, we developed NanoPipe, a web-driven automatic pipeline that  
85 can quickly and effortlessly process data produced by MinION™, as well provide necessary  
86 files for further bioinformatics analysis if required.

## 87 **Methods**

88 NanoPipe can be conceptually divided into four stages: 1) data uploading in FASTA or  
89 FASTQ formats, 2) alignment of MinION™ reads against the target sequences, 3) alignment  
90 analysis, and 4) results display (see Fig. 1). It was developed with no-IT-experienced users  
91 in mind, hence it provides a web-driven interface with the usage page describing the main

92 features of the tool. The start-of-analysis page is simple and intuitive. A user must, first,  
93 choose a target genome from a NanoPipe's list (see further) or upload their own target  
94 sequence. The next step is the essential part of the pipeline: mapping of sequencing reads  
95 to the target using the LAST sequence aligner (version 946). LAST accounts for the  
96 MinION™ specific sequencing errors, thus it generates highly reliable results. It can  
97 determine the rates of insertion, deletion and each kind of substitution in a type of data  
98 (e.g. MinION™ reads of AT-rich *Plasmodium* DNA) [23]. It then uses these rates to  
99 determine the most probable alignments. LAST also finds the most probable division of  
100 each read into one or more parts together with the most probable alignment of each part  
101 with the last-split function [24], [25], i.e. if LAST finds a better scoring alternative alignment  
102 of the read where it is being split into parts and mapped to different regions of the target,  
103 such alignment is submitted to the results. This is a principled way to handle complex DNA  
104 rearrangements, gene fusions in RNA, chimeric host/viral sequences, etc. The tasks of  
105 detecting polymorphisms and distinguishing viral serotypes can be performed more  
106 precisely for MinION™ data when based on a LAST alignment, because the tool estimates  
107 the probability that each base is correctly aligned. The probability is low if there is an  
108 ambiguity, i.e. the base could align to more than one place. The default NanoPipe  
109 parameters for the LAST alignment are efficient for most cases, but can be easily adjusted  
110 by the user. We use last-train to find the optimal alignment parameters for MinION™  
111 sequencing [23]. For advanced users, it is recommended, although not necessary, to  
112 acquaint with the settings of LAST and last-train [26].

113 After the alignment is completed, NanoPipe evaluates the nucleotide variation for each  
114 position, and based on this analysis generates consensus sequence and a list of possible  
115 single nucleotide polymorphisms (SNP). The minimum nucleotide count per position  
116 should be at least ten (i.e., at least ten reads), otherwise a gap will be assigned at the



117 position in the consensus sequence. The consensus sequence is calculated based on the  
118 majority rule, i.e. the nucleotide with the higher count at a particular position is assigned  
119 to the consensus. If the counts for any two nucleotides differ from each other by not more  
120 than by 20%, both nucleotides are included in the consensus with the use of the IUPAC  
121 nomenclature [27]. Statistical evaluation of nucleotide variation is presented in a separate  
122 table, and suggests a polymorphism candidate if an alternate nucleotide has coverage of at  
123 least 20% of all reads.

124 Figure 1. A schematic representation of the NanoPipe workflow.

125  
126 To distinguish between artifacts and true polymorphisms, we have set three additional  
127 filters. First, SNP candidate should have read coverage of at least 30% from the maximum  
128 coverage in the respective contig, otherwise it is not listed in the polymorphisms table and  
129 not counted as a SNP. Second, the probability of SNP at the position is calculated. For that,  
130 the relative nucleotide frequency is multiplied by a custom weight factor: transversions are  
131 weighted by the factor of 1 and transitions – by the factor of 2. This is based on the  
132 assumption that transitions are two times more likely than transversions. This weighted  
133 probability for each SNP candidate is rescaled for convenience, so that the maximum value  
134 is 1. The probability is displayed for each nucleotide in the polymorphisms table, a SNP  
135 candidate is most likely to be the true SNP if its joint probability is 1. Third, the analysis is  
136 refined by an assessment of the alignment quality around a potential SNP by estimating a  
137 p-error. The p-error is calculated based on the formula used in the LAST methods to  
138 calculate the probability of the alignment for a single nucleotide [28]. In NanoPipe the p-  
139 error is estimated over a region of maximum 10 nucleotides before and after the SNP  
140 position (excluding the SNP itself) and for all the read alignments at the region (Fig. 2). It is  
141 based on the LAST reliability score assigned to each base pair of the alignment. In addition,

142 polymorphism candidates for human and *Plasmodium* are linked to the public SNP  
143 databases.

$$p - error = \frac{\sum_1^i 10^{-\left(\frac{ASCII_{value}-33}{10}\right)}}{i}$$

145 Figure 2. Formula used in NanoPipe for the p-error calculations, where  $i$  is the total number  
146 of nucleotides around the SNP for all mapped reads, i.e.  $i = N(\text{nucleotides around}$   
147  $\text{SNP}) * N(\text{reads mapped to the evaluated region})$ . ASCII values are extracted from the LAST  
148 alignment and indicate the reliability of each base's alignment, see more information about  
149 LAST quality symbols at [28].

150 The results are supplemented with a number of useful pages, such as alignment of  
151 consensus sequences against target sequences, read length distribution and individual  
152 reads' alignment length distribution, and nucleotide plots showing distribution of  
153 nucleotides from all reads at each position of the consensus sequence. The latter is the  
154 interactive visual representation of the results and enables the user to monitor any  
155 nucleotide variations by eye. NanoPipe also provides the necessary files for browsing the  
156 alignment in the IGV genome browser [29], where each individual read alignment is  
157 displayed.

## 158 Findings

159 The experience of our working group in conducting MinION™ sequencing and analysis  
160 workshops [30] for medical doctors and wet-lab researchers revealed the general gaps in  
161 bioinformatics knowledge among these groups. While the experimental part of the  
162 workshop was easily performed by the participants, even if mastered for the first time, the  
163 processing of the sequenced data proved to be the most enduring and difficult part.

164 Therefore, keeping in mind the weakest spots of non-bioinformatician researchers, we will  
165 describe here some features of NanoPipe usage in details.  
166 To start a new analysis, a query (sequencing reads) and a target (a genome or a region of  
167 interest) should be provided. The query (1D or 1D<sup>2</sup>) can be uploaded via the NanoPipe's  
168 web interface from the user's computer in one FASTA or FASTQ file, also in archived format.  
169 As the ONT-provided base callers output sequenced reads in multiple files, it is important  
170 to know how to merge them into one file, in an operating system of the user (Windows, Mac  
171 OS, Linux). As an alternative, NanoPipe can also handle multiple FASTA or FASTQ files when  
172 they are archived (zipped), for example, with "zip" command on Linux or WinZip tool on  
173 Windows. The maximum size of the query file should not exceed 3 GB. The target can be  
174 chosen from a drop-down menu or uploaded by the user in FASTA format. The list of  
175 NanoPipe precompiled targets includes reference genomes for human (hg38), RefSeq  
176 accession GCF\_000001405.38; *Escherichia coli*, RefSeq accession GCF\_000005845.2;  
177 *Caenorhabditis elegans*, RefSeq accession GCF\_000002985.6; *Drosophila melanogaster*,  
178 RefSeq accession GCF\_000001215.4; *Mus musculus*, RefSeq accession GCF\_000001635.26;  
179 *Arabidopsis thaliana*, RefSeq accession GCF\_000001735.4; *Plasmodium falciparum* strain  
180 3D7, downloaded from plasmodb.org, version=2013-03-01; a representative genome for  
181 *Camponotus floridanus*, RefSeq accession GCF\_003227725.1; and Dengue virus genome  
182 variants for serotyping (NC\_001477.1, NC\_001474.2, NC\_001475.2 and NC\_002640.1 for  
183 variant 1, variant 2, variant 3 and variant 4, respectively). Otherwise, DNA sequences of  
184 whole genomes, transcriptomes or genes for different organisms can be accessed via  
185 particular species databases or in the corresponding databases at NCBI [31]. The NanoPipe  
186 prepared targets include the precompiled, best fitting alignment parameters and  
187 substitution matrices (based on last-train calculations). The substitution matrix is an  
188 important part of any alignment and contains information about the mismatch cost

189 between any pair of nucleotides. Any uploaded targets will be used with the NanoPipe  
1  
2 190 default parameters that are suitable for most cases. To avoid “noise”, i.e. mapping of too  
3  
4  
5 191 short reads, the user can set the read length limit, for example to 200 nucleotides (depends  
6  
7 192 on the experiment type and purpose). A unique name can be assigned to a job and used  
8  
9  
10 193 later within one month to retrieve the results from the NanoPipe server. After one month  
11  
12 194 the data will be deleted from the server.

13  
14  
15 195 Depending on the query and target size, a NanoPipe analysis can last from several minutes  
16  
17 196 to several hours, the server’s memory used for the calculations is limited to 16 GB. The  
18  
19  
20 197 user will receive the notification via email (if the email address was provided) when  
21  
22 198 his/her job is completed. The summary of the completed analysis depicts the LAST  
23  
24  
25 199 parameters that were used and the mapping statistics, i.e. how many reads were mapped  
26  
27 200 altogether and the reads distribution per chromosomes/scaffolds of the target. This table  
28  
29  
30 201 can be sorted in increasing/decreasing order. Mapping distribution statistics show how  
31  
32 202 long the reads in the query were, and allow estimating whether the sequencing resulted in  
33  
34  
35 203 the expected read lengths. Thus, for whole genome sequencing by MinION™ a researcher  
36  
37 204 can expect read lengths up to several thousand nucleotides; targeted sequencing results in  
38  
39  
40 205 read lengths corresponding to the target length; transcriptome sequencing or RNAseq  
41  
42 206 experiments should provide reads with length typical to particular species’ transcript  
43  
44  
45 207 lengths (around one-to-two thousand nucleotides for most organisms). Alignment  
46  
47 208 distribution statistics inform about the quality of the alignment, i.e. whether the whole read  
48  
49  
50 209 or a part of it could be mapped to the target.

51  
52  
53 210 Alignment results are visualized in NanoPipe in several ways: ordinal line by line pairwise  
54  
55 211 alignment, a BAM file and a graphical representation via nucleotide plots. BAM and indexed  
56  
57  
58 212 BAM (BAI) files can be easily downloaded from the results page and further used for an  
59  
60 213 interactive genome browsers, for example, IGV. The target FASTA files are required by IGV,  
61  
62  
63  
64  
65

214 as well, and can be downloaded together with BAM files. IGV is free software and can be  
1  
2 215 accessed from [32]. Nucleotide plots represent the colored mapping scheme at each  
3  
4  
5 216 position of the sequence, each nucleotide marked with its specific color. This enables easy  
6  
7 217 monitoring for gaps and possible nucleotide substitutions. Navigating along the plot is  
8  
9  
10 218 enabled via right and left shift, as well by entering a nucleotide's coordinate in the search  
11  
12 219 field. For long target regions, nucleotide plots provide a zoom-out preview at the bottom of  
13  
14  
15 220 the page.

16  
17  
18 221 Each chromosome/region of the target is supported with an individual consensus which  
19  
20  
21 222 can be seen and downloaded in FASTA format. Positions that cannot be defined (not enough  
22  
23 223 information in the input data) are designated as "N", gaps are designated as "-";  
24  
25  
26 224 controversial positions are designated using IUPAC nomenclature.

27  
28  
29 225 The polymorphisms table lists SNP candidates and provides joint probabilities for each  
30  
31  
32 226 candidate (maximum = 1), as well raw counts for each nucleotide at the target position. If  
33  
34 227 the data are available, the corresponding SNP IDs (identifiers) will be retrieved from the  
35  
36  
37 228 existing databases (currently available only for human [33] and *Plasmodium* [34]). The  
38  
39 229 alignment quality around an SNP candidate is reported as p-error, the higher the p-error  
40  
41  
42 230 (maximum 1), the lower the alignment quality. Low alignment quality might indicate a  
43  
44 231 region of sequencing errors around an individual SNP and, thus, signify the lower reliability  
45  
46  
47 232 of the candidate detection. However, a cluster of closely located SNPs within a distance of  
48  
49 233 less than 10 nucleotides would have a similar effect. Therefore, the p-error is an additional  
50  
51  
52 234 parameter that might be taken into consideration by the user. Detailed analysis of the  
53  
54 235 nucleotide plot or the alignment in the IGV viewer around questionable candidates may  
55  
56  
57 236 help in making a decision, including consideration of biological relevance.

237 To view the result pages for nucleotide plots, consensus, polymorphisms and alignment the  
1  
2 238 user needs to choose a particular chromosome/region. This approach accelerates the data  
3  
4  
5 239 display and prevents the web browser from overloading.  
6  
7

8 240  
9

## 10 241 **Study cases**

### 11 242 ***Plasmodium* polymorphism detection**

12  
13 243 The targeted regions were first amplified using the standard PCR protocol [35]. The  
14  
15  
16 244 resulting amplicons were sequenced with the MinION™ using the ONT sequencing kit SDK-  
17  
18  
19 245 MAP005 or SQK-MAP006 for the library preparation and the flow cell version FLO-  
20  
21  
22 246 MAP003. The sequences were aligned against the *Plasmodium* genome (*P. falciparum*  
23  
24  
25 247 reference genome based on 3D7 strain). Exhaustive discussion of the ONT utility for  
26  
27  
28 248 *Plasmodium* SNP calling and the library preparation methods are presented elsewhere [35].  
29  
30  
31 249 NanoPipe succeeded in mapping 99.9% of all query reads and detecting the expected  
32  
33 250 mutations (see Fig. 3). The specific characteristic of the *Plasmodium* genome, multiple AT/T  
34  
35  
36 251 repeats, can be easily observed in the nucleotide plot. The full analysis of a 21 MB (FASTA  
37  
38 252 format) query against the *P. falciparum* genome with NanoPipe took less than four minutes.  
39  
40  
41 253 This example demonstrates that the analysis of just 10157 MinION™ reads with a high AT  
42  
43 254 content on NanoPipe results in reliable data. Detailed screen shots of the NanoPipe results for  
44  
45 255 this study case can be found in the Supplementary material (Figures S2 – S10).  
46  
47

48 256  
49

50 257 Figure 3. Sample case 1. A: The polymorphisms table displays the three SNP candidates: two of  
51  
52 258 them (at positions 403625 and 404407) are expected mutations leading to K76T and A220S  
53  
54  
55 259 amino acid changes and, as a consequence, to altered resistance of the parasite to chloroquine,  
56  
57  
58 260 mefloquine and quinine drugs [35]. B: Nucleotide plot. The purple arrow points to the G>T  
59  
60  
61  
62  
63  
64  
65

261 substitution at the position 404407 (GCC>TCC codon change). The orange arrow highlights an  
1  
2 262 AT-rich region, the typical feature of the *P. falciparum* genome.

3  
4  
5 263

6  
7 264 **Targeted sequencing of EGFR transcript from human lung adenocarcinoma cell line**  
8  
9 265 **H1975**

10  
11  
12 266 The region of the human EGFR cDNA corresponding to exons 17-22 was amplified using the  
13  
14 267 primers CTAAGATCCCGTCCATCGCC (forward) and ACATATGGGTGGCTGAGGGA  
15  
16 268 (reverse). The library preparation was performed following the manufacturer's recommendation  
17  
18  
19 269 using the SQK-LSK108 kit from ONT and then sequencing was done with the MinION™ using  
20  
21  
22 270 flow cell version FLO-MIN107 R9. The raw 1D reads (900 MB, FASTA format) were uploaded  
23  
24 271 to NanoPipe using the human reference genome as a target; the analysis took 135 minutes. 79.9%  
25  
26 272 of all reads were mapped to the EGFR gene on chromosome 7. Most of the remaining reads  
27  
28  
29 273 (13.5%) were mapped to chromosome 11, to regions corresponding to the cortactin gene  
30  
31 274 (NM\_138565) that is overexpressed in different cancers [36], and the gene encoding subunit 2  
32  
33  
34 275 of the splicing factor 3b protein complex (NM\_006842). This gene might be differentially  
35  
36 276 expressed in tumor tissues [37], nevertheless, there is no definite research about possible roles of  
37  
38  
39 277 this gene in cancers. It may be the case that the gene is overexpressed in cell line H1975 and,  
40  
41 278 therefore, its transcript was sequenced as an abundant contaminant, similar to the cortactin  
42  
43  
44 279 transcript. The four mutations expected within this region in this cell line [38] were detected, see  
45  
46 280 Fig. 4. This example demonstrates the suitability of NanoPipe for cancer sequencing analysis.  
47

48 281  
49  
50  
51 282 Figure 4. A. Polymorphisms results. The two expected nucleotide substitutions are silent: G>A  
52  
53 283 (CAG>CAA = Gln) at position 55181370 and T>C (ACT>ACC = Thr) at position 55198724;  
54  
55  
56 284 two other substitutions at position 55181378 (C>T leading to the amino acid change T745M) and  
57  
58 285 at position 55191822 (T>G leading to the amino acid change L813R) are responsible for the  
59  
60  
61 286 sensitivity to anticancer drugs, in particular to gefitinib and erlotinib [38]. B. Nucleotide plot.  
62  
63  
64  
65

287 The zoom-out scheme at the bottom depicts seven alignment picks, they represent seven  
288 sequenced exons of the transcript. The nucleotide plot is showing the first of these picks, pointed  
289 to by the orange arrows.

290

### 291 **RNAseq analysis of the ant species *Camponotus maculatus***

292 Poly-A RNA was extracted using the standard procedures, the library was prepared using the  
293 SQK-PCS108 kit from ONT and then sequenced with MinION™ using FLO-MIN107 R9 flow  
294 cell version following the manufacturer's recommendations. The raw 1D reads in FASTA format  
295 were uploaded to NanoPipe, the reference genome of *Camponotus floridanus* was used as the  
296 target genome, as neither genome nor transcriptome of *C. maculatus* are available yet. The  
297 analysis of the 1.5 GB query ran for 3 hours. Out of 1814750 raw reads 1773747 (97.7 %) were  
298 mapped to the target, spanning 431 scaffolds out of 657, including 150 scaffolds with coverage  
299 of more than 1000 reads per scaffold. This result is consistent with the number of reads  
300 sequenced, and the fact that the target was the genome of a different species, thus, NanoPipe can  
301 be used for studying newly sequenced species.

302

### 303 **Discussion**

304 We have developed NanoPipe, a web-driven application that enables easy analysis of  
305 MinION™ sequencing data and is suitable for, both, experienced bioinformaticians and  
306 biologists with limited IT knowledge. NanoPipe provides users with the consensus  
307 sequence of the studied DNA and a list of putative single nucleotide polymorphisms. In this  
308 work, we used three different experimental datasets: targeted sequencing of the AT-rich  
309 genome of *P. falciparum*, targeted sequencing of EGFR human cDNA, and RNAseq of the ant  
310 *P. maculatus* that has so far no fully sequenced genome nor transcriptome. These three test  
311 cases represent different tasks that biologists from different fields of study could be  
312 interested in: sequencing and SNP detection in a repeat-rich genomes with low sequencing



1  
2  
3  
4  
5  
6  
7  
8  
9  
10  
11  
12  
13  
14  
15  
16  
17  
18  
19  
20  
21  
22  
23  
24  
25  
26  
27  
28  
29  
30  
31  
32  
33  
34  
35  
36  
37  
38  
39  
40  
41  
42  
43  
44  
45  
46  
47  
48  
49  
50  
51  
52  
53  
54  
55  
56  
57  
58  
59  
60  
61  
62  
63  
64  
65

313 yield (study case with *P. falciparum*); mutation detection in human cancer samples (study  
314 case with lung adenocarcinoma cell line H1975); RNAseq of a newly sequenced organism  
315 (study case with *C. maculatus*). NanoPipe proved to be a reliable tool for all these tasks. It  
316 detected all expected mutations for *Plasmodium* and the EGFR transcript region and  
317 succeeded in mapping more than 90% RNAseq reads from *C. maculatus* to the reference  
318 genome. We have tested NanoPipe during two workshops at the International Summer  
319 School for MinION™ sequencing in Bangkok (2017) and Manado (2018) with participants  
320 having no bioinformatics experience from the medical and biological research fields.  
321 NanoPipe proved to be efficient and understandable for these users. Nevertheless, our team  
322 also noted during these practical studies that the participants lacked some basic  
323 knowledge, necessary for conducting successful sequencing experiments. Therefore, we  
324 described here in detail the general scheme of working with long read sequencing data. The  
325 flexibility of NanoPipe allows researchers to study any sequence of interest (including  
326 cancer samples in human patients), as the list of targets is not limited. With this software,  
327 we hope to make MinION™ sequencing even more accessible for medical researchers and  
328 biologists without sophisticated IT resources and expertise. The next step for the NanoPipe  
329 project will include more sophisticated statistics for SNP detection and evaluation. Also, we  
330 are planning to cover the microbiology field and implement an option for metagenomics  
331 analysis.

### 332 333 **Availability of data and source code**

334 Project name: NanoPipe

335 Project home page: <http://bioinformatics.uni-muenster.de/tools/nanopipe>, github page:

336 <https://github.com/IOB-Muenster/nanopipe2>. The NanoPipe package for local installation is

337 available at the NanoPipe github page.

338 Operating system: Unix

339 Programming language: Javascript, Python, Perl  
1  
2 340 License: Apache License 2.0  
3  
4 341 Other: there are no limitations for web browser type. The local version can be installed on Unix  
5  
6  
7 342 operating system  
8  
9 343 For reviewers: The raw sequence data for the test runs can be accessed from the homepage  
10  
11 344 [http://bioinformatics.uni-muenster.de/share/NanoPipe\\_test\\_data/](http://bioinformatics.uni-muenster.de/share/NanoPipe_test_data/)  
12  
13  
14 345 Test data description:  
15  
16  
17 346 1. Data set *P. falciparum* sequencing  
18  
19 347 1.1 MinION targeted sequencing for *Plasmodium falciparum* sequencing.  
20  
21 348 1.2 PfCRT and K-propeller genes were sequenced using long-read technologies within the  
22  
23 experiments of testing MinION sequencer for SNP detection in *Plasmodium*.  
24 349  
25  
26 350 1.3 The sequencing was performed for the MinION™ sequencing workshop, 2017 in  
27  
28 Bangkok, Thailand at the Mahidol University.  
29 351  
30  
31 352 1.4 Raw reads in a single FASTA file, archived using zgzip command.  
32  
33  
34 353 1.5 *P. falciparum* culture, strain 3D7.  
35  
36 354 1.6 Size: 21 MB, archived: 4,3 MB.  
37  
38  
39 355  
40  
41 356 2. Data set for EGFR sequencing  
42  
43 357 2.1 MinION targeted sequencing of the CDS for EGFR human gene, spanning exons 17-22.  
44  
45  
46 358 2.2 This data were generated to test MinION capacity for detecting SNP in human cancer  
47  
48 359 DNA  
49  
50  
51 360 2.3 The sequencing was performed for the MinION™ sequencing workshop, 2017 in  
52  
53 361 Bangkok, Thailand at the Mahidol University.  
54  
55  
56 362 2.4 Raw reads in a single FASTA file, archived using zgzip command.  
57  
58 363 2.5 Human lung adenocarcinoma cell line H1975  
59  
60  
61 364 2.6 Size: 900 MB, archived: 259 MB.  
62  
63  
64  
65

- 365  
1  
2 366 3. Data set for *Camponotus maculatus* sequencing  
3  
4 367 3.1 MinION RNAseq for ant *C. maculatus*  
5  
6  
7 368 3.2 Poly-A RNA sequencing was performed for the given ant species at first time  
8  
9 369 3.3 The sequencing was performed in the Institute of Bioinformatics, Muenster, Germany; the  
10  
11  
12 370 library was prepared in the group of Juergen Gadau, University of Muenster.  
13  
14 371 3.4 Raw reads in a single FASTA file, archived using zgip command.  
15  
16  
17 372 3.5 Larvae and adult individuals from the lab culture  
18  
19 373 3.6 Size: 1.5 GB, archived: 309 MB.  
20  
21  
22 374

23  
24 375 The recent job IDs for the test cases in the text can be viewed in NanoPipe: 153789033639638  
25  
26 376 (*P. falciparum*), 153789042448841 (EGFR, human), 153789615015896 (*C. maculatus*).  
27  
28

29 377  
30  
31 378 **Supplementary materials.**  
32

33  
34 379 Figure S1: Number of scientific publications that contain the phrase “Oxford Nanopore” in  
35  
36 380 their abstracts.  
37

38  
39 381 Figures S2-S10: The results pages for the *P. falciparum* test case.  
40

41 382  
42  
43 383 **Declarations**  
44

45  
46 384 **List of abbreviations**  
47

48 385 ONT Oxford Nanopore Technologies  
49

50  
51 386 SNP Single Nucleotide Variation  
52

53 387 IT Information Technology  
54

55  
56 388 ID Identifier  
57

58 389 GB GigaByte  
59  
60  
61 390  
62  
63  
64  
65

391 **Ethics approval and consent to participate**

392 Not applicable

393

394 **Consent for publication**

395 Not applicable

396

397 **Competing interests**

398 The authors declare that they have no competing interests

399

400 **Funding**

401 The work has been funded by Institute of Bioinformatics, University of Muenster and

402 University Clinic Muenster (UKM)

403

404 **Authors' contribution**

405 VS validated the software, participated in the concept design and composed the manuscript draft;

406 TK designed the software and participated in the code writing; FM wrote the code for

407 polymorphism analysis and contributed to the manuscript writing; NG wrote the major part of

408 the pipeline code and designed the software; MF participated in the improvement of the software,

409 including LAST optimization, and contributed to the manuscript writing; YS contributed to the

410 analysis and provided the access to the MinION™ sequencing summer school; WM designed the

411 concept and supervised the work. All the authors read and approved the manuscript.

412

413 **Acknowledgements**

414 The targeted sequencing of *Plasmodium falciparum* (strain 3D7) genes PfCRT\_1, PfCRT\_2,

415 K13-propeller and EGFR human transcript was done for the MinION™ sequencing workshop in

416 Bangkok, Thailand 2017 at the Mahidol University. The RNAseq library for *P. maculatus* was

417 prepared by the group of Jürgen Gadau, Molecular Evolution and Sociobiology group, University  
1  
2 418 of Münster.  
3

4  
5 419

## 7 420 **References**

- 8  
9 421 [1] ONT, “Flongle.” [Online]. Available: <https://nanoporetech.com/products/flongle>. [Accessed: 05-Sep-  
10 422 2018].  
11  
12  
13 423 [2] T. A. Sasani, K. R. Cone, A. R. Quinlan, and N. C. Elde, “Long read sequencing reveals poxvirus  
14 424 evolution through rapid homogenization of gene arrays,” *bioRxiv*, p. 245373, Jan. 2018.  
15  
16  
17 425 [3] T. Karamitros, I. Harrison, R. Piorkowska, A. Katzourakis, G. Magiorkinis, and J. L. Mbisa, “De Novo  
18 426 Assembly of Human Herpes Virus Type 1 (HHV-1) Genome, Mining of Non-Canonical Structures and  
19 427 Detection of Novel Drug-Resistance Mutations Using Short- and Long-Read Next Generation  
20 428 Sequencing Technologies,” *PLoS One*, vol. 11, no. 6, p. e0157600, Jun. 2016.  
21  
22  
23  
24 429 [4] A. Bronzato Badial, D. Sherman, A. Stone, A. Gopakumar, V. Wilson, W. Schneider, and J. King,  
25 430 “Nanopore Sequencing as a Surveillance Tool for Plant Pathogens in Plant and Insect Tissues,” *Plant*  
26 431 *Dis.*, vol. 102, no. 8, pp. 1648–1652, Aug. 2018.  
27  
28  
29  
30 432 [5] M. B. Fleming, E. L. Patterson, P. A. Reeves, C. M. Richards, T. A. Gaines, and C. Walters, “Exploring the  
31 433 fate of mRNA in aging seeds: protection, destruction, or slow decay?,” *J. Exp. Bot.*, vol. 69, no. 18, pp.  
32 434 4309–4321, Aug. 2018.  
33  
34  
35  
36 435 [6] A. Bainomugisa, T. Duarte, E. Lavu, S. Pandey, C. Coulter, B. J. Marais, and L. M. Coin, “A complete  
37 436 high-quality MinION nanopore assembly of an extensively drug-resistant Mycobacterium  
38 437 tuberculosis Beijing lineage strain identifies novel variation in repetitive PE/PPE gene regions,”  
39 438 *Microb. Genomics*, Jun. 2018.  
40  
41  
42  
43 439 [7] W. Pearman, A. N. H. Smith, G. Breckell, J. Dale, N. E. Freed, and O. K. Silander, “New tools for diet  
44 440 analyses: nanopore sequencing of metagenomic DNA from stomach contents to quantify diet in an  
45 441 invasive population of rats,” *bioRxiv*, p. 363622, Jul. 2018.  
46  
47  
48  
49 442 [8] S. Theuns, B. Vanmechelen, Q. Bernaert, W. Deboutte, M. Vandenhole, L. Beller, J. Matthijnsens, P.  
50 443 Maes, and H. J. Nauwynck, “Nanopore sequencing as a revolutionary diagnostic tool for porcine viral  
51 444 enteric disease complexes identifies porcine kobuvirus as an important enteric virus,” *Sci. Rep.*, vol.  
52 445 8, no. 1, p. 9830, Dec. 2018.  
53  
54  
55  
56  
57 446 [9] H. Krehenwinkel, A. Pomerantz, J. B. Henderson, S. R. Kennedy, J. Y. Lim, V. Swamy, J. D. Shoobridge,  
58  
59  
60  
61  
62  
63  
64  
65

- 447 N. H. Patel, R. G. Gillespie, and S. Prost, "Nanopore sequencing of long ribosomal DNA amplicons  
 1 enables portable and simple biodiversity assessments with high phylogenetic resolution across  
 2 448 broad taxonomic scale," *bioRxiv*, p. 358572, Jun. 2018.
- 3  
 4 449  
 5  
 6 450 [10] J. Quick, N. J. Loman, S. Duraffour, J. T. Simpson, E. Severi, L. Cowley, J. A. Bore, R. Koundouno, G.  
 7  
 8 451 Dudas, A. Mikhail, N. Ouédraogo, B. Afrough, A. Bah, J. H. J. Baum, B. Becker-Ziaja, J. P. Boettcher, M.  
 9  
 10 452 Cabeza-Cabrerizo, Á. Camino-Sánchez, L. L. Carter, J. Doerrbecker, T. Enkirch, I. G.- Dorival, N.  
 11  
 12 453 Hetzelt, J. Hinzmann, T. Holm, L. E. Kafetzopoulou, M. Koropogui, A. Kosgey, E. Kuisma, C. H. Logue, A.  
 13  
 14 454 Mazzarelli, S. Meisel, M. Mertens, J. Michel, D. Ngabo, K. Nitzsche, E. Pallasch, L. V. Patrono, J.  
 15  
 16 455 Portmann, J. G. Repits, N. Y. Rickett, A. Sachse, K. Singethan, I. Vitoriano, R. L. Yemanaberhan, E. G.  
 17  
 18 456 Zekeng, T. Racine, A. Bello, A. A. Sall, O. Faye, O. Faye, N. Magassouba, C. V. Williams, V. Amburgey, L.  
 19  
 20 457 Winona, E. Davis, J. Gerlach, F. Washington, V. Monteil, M. Jourdain, M. Bererd, A. Camara, H. Somlare,  
 21  
 22 458 A. Camara, M. Gerard, G. Bado, B. Baillet, D. Delaune, K. Y. Nebie, A. Diarra, Y. Savane, R. B. Pallawo, G.  
 23  
 24 459 J. Gutierrez, N. Milhano, I. Roger, C. J. Williams, F. Yattara, K. Lewandowski, J. Taylor, P. Rachwal, D. J.  
 25  
 26 460 Turner, G. Pollakis, J. A. Hiscox, D. A. Matthews, M. K. O. Shea, A. M. Johnston, D. Wilson, E. Hutley, E.  
 27  
 28 461 Smit, A. Di Caro, R. Wölfel, K. Stoecker, E. Fleischmann, M. Gabriel, S. A. Weller, L. Koivogui, B. Diallo,  
 29  
 30 462 S. Keita, A. Rambaut, P. Formenty, S. Günther, and M. W. Carroll, "Real-time, portable genome  
 31 sequencing for Ebola surveillance," *Nature*, vol. 530, no. 7589, pp. 228–232, Feb. 2016.  
 32  
 33 463  
 34  
 35 464 [11] P. Mbala Kingebeni, C.-J. Villabona-Arenas, N. Vidal, J. Likofata, J. Nsio-Mbeta, S. Makiala-Mandanda,  
 36  
 37 465 D. Mukadi, P. Mukadi, C. Kumakamba, B. Djokolo, A. Ayoubu, E. Delaporte, M. Peeters, J.-J. Muyembe  
 38  
 39 466 Tamfum, and S. Ahuka Mundeke, "Rapid confirmation of the Zaire Ebola Virus in the outbreak of the  
 40  
 41 467 Equateur province in the Democratic Republic of Congo: implications for public health  
 42  
 43 468 interventions," *Clin. Infect. Dis.*, Jun. 2018.
- 44  
 45 469 [12] S. L. Castro-Wallace, C. Y. Chiu, K. K. John, S. E. Stahl, K. H. Rubins, A. B. R. McIntyre, J. P. Dworkin, M.  
 46  
 47 470 L. Lupisella, D. J. Smith, D. J. Botkin, T. A. Stephenson, S. Juul, D. J. Turner, F. Izquierdo, S. Federman,  
 48  
 49 471 D. Stryke, S. Somasekar, N. Alexander, G. Yu, C. E. Mason, and A. S. Burton, "Nanopore DNA  
 50  
 51 472 Sequencing and Genome Assembly on the International Space Station," *Sci. Rep.*, vol. 7, no. 1, p.  
 52  
 53 473 18022, Dec. 2017.
- 54  
 55 474 [13] E. A. Soares, M. Chakraborty, D. E. Miller, S. Kalsow, K. Hall, A. G. Perera, J. J. Emerson, and R. S.  
 56  
 57 475 Hawley, "Rapid Low-Cost Assembly of the *Drosophila melanogaster* Reference Genome Using Low-  
 58  
 59 476 Coverage, Long-Read Sequencing," *G3 (Bethesda)*, p. g3.200162.2018, Jul. 2018.

- 477 [14] S. Deschamps, Y. Zhang, V. Llaca, L. Ye, G. May, and H. Lin, "A chromosome-scale assembly of the  
1  
2 478 sorghum genome using nanopore sequencing and optical mapping," *bioRxiv*, p. 327817, May 2018.
- 3  
4 479 [15] B. Pradhan, T. Cajuso, R. Katainen, P. Sulo, T. Tanskanen, O. Kilpivaara, E. Pitkänen, L. A. Aaltonen, L.  
5  
6 480 Kauppi, and K. Palin, "Detection of subclonal L1 transductions in colorectal cancer by long-distance  
7  
8 481 inverse-PCR and Nanopore sequencing," *Sci. Rep.*, vol. 7, no. 1, p. 14521, Dec. 2017.
- 9  
10 482 [16] L. F. K. Kuderna, E. Lizano, E. Julia, J. Gomez-Garrido, A. Serres-Armero, M. Kuhlwilm, R. A. Alandes,  
11  
12 483 M. Alvarez-Estape, T. Alioto, M. Gut, I. Gut, M. H. Schierup, O. Fornas, and T. Marques-Bonet,  
13  
14 484 "Selective single molecule sequencing and assembly of a human Y chromosome of African origin,"  
15  
16 485 *bioRxiv*, p. 342667, Jun. 2018.
- 17  
18 486 [17] K. Chacon-Vargas, A. A. Chirino, M. M. Davis, S. A. Debler, W. R. Haimer, J. J. Wilbur, X. Mo, B. W.  
19  
20 487 Worthing, E. G. Wainblat, S. Zhao, and J. G. Gibbons, "Genome Sequence of *Zymomonas mobilis* subsp.  
21  
22 488 *mobilis* NRRL B-1960," *Genome Announc.*, vol. 5, no. 30, Jul. 2017.
- 23  
24 489 [18] A. C. Reis, K. Kroll, M. Gomila, B. A. Kolvenbach, P. F. X. Corvini, and O. C. Nunes, "Complete Genome  
25  
26 490 Sequence of *Achromobacter denitrificans* PR1," *Genome Announc.*, vol. 5, no. 31, Aug. 2017.
- 27  
28 491 [19] Metrichor, "METRICHOR LTD." [Online]. Available: <https://metrichor.com/>. [Accessed: 05-Sep-  
29  
30 492 2018].
- 31  
32  
33 493 [20] N. J. Loman, J. Quick, and J. T. Simpson, "A complete bacterial genome assembled de novo using only  
34  
35 494 nanopore sequencing data," *Nat. Methods*, vol. 12, no. 8, pp. 733–735, Aug. 2015.
- 36  
37 495 [21] A. Srivathsan, B. Baloglu, W. Wang, W. X. Tan, D. Bertrand, A. H. Q. Ng, E. J. H. Boey, J. J. Y. Koh, N.  
38  
39 496 Nagarajan, and R. Meier, "A MinION-based pipeline for fast and cost-effective DNA barcoding,"  
40  
41 497 *bioRxiv*, p. 253625, Jan. 2018.
- 42  
43 498 [22] R. M. Leggett, D. Heavens, M. Caccamo, M. D. Clark, and R. P. Davey, "NanoOK: multi-reference  
44  
45 499 alignment analysis of nanopore sequencing data, quality and error profiles," *Bioinformatics*, vol. 32,  
46  
47 500 no. 1, p. btv540, Sep. 2015.
- 48  
49 501 [23] M. Hamada, Y. Ono, K. Asai, M. C. Frith, and J. Hancock, "Training alignment parameters for arbitrary  
50  
51 502 sequencers with LAST-TRAIN," *Bioinformatics*, vol. 33, no. 6, p. btw742, Dec. 2016.
- 52  
53 503 [24] M. C. Frith and R. Kawaguchi, "Split-alignment of genomes finds orthologies more accurately,"  
54  
55 504 *Genome Biol.*, vol. 16, no. 1, p. 106, Dec. 2015.
- 56  
57 505 [25] M. C. Frith and S. Khan, "A survey of localized sequence rearrangements in human DNA," *Nucleic  
58  
59 506 Acids Res.*, vol. 46, no. 4, pp. 1661–1673, Feb. 2018.
- 60  
61  
62  
63  
64  
65

- 507 [26] Frith M., "LAST: genome-scale sequence comparison." [Online]. Available: <http://last.cbrc.jp/>.  
1  
2 508 [Accessed: 05-Sep-2018].  
3
- 4 509 [27] IUPAC, "IUPAC Codes." [Online]. Available: <https://www.bioinformatics.org/sms/iupac.html>.  
5  
6 510 [Accessed: 05-Sep-2018].  
7
- 8 511 [28] Frith M., "last-split." [Online]. Available: <http://last.cbrc.jp/doc/last-split.html>. [Accessed: 05-Sep-  
9  
10 512 2018].  
11
- 12 513 [29] H. Thorvaldsdottir, J. T. Robinson, and J. P. Mesirov, "Integrative Genomics Viewer (IGV): high-  
13  
14 514 performance genomics data visualization and exploration," *Brief. Bioinform.*, vol. 14, no. 2, pp. 178-  
15  
16 515 192, Mar. 2013.  
17
- 18 516 [30] Y. Suzuki, "JSPS, Training Seminar for MinION." [Online]. Available: [http://www.cb.k.u-  
19  
20 517 tokyo.ac.jp/suzukilab/minion/summary.html](http://www.cb.k.u-). [Accessed: 09-Oct-2018].  
21
- 22 518 [31] NCBI, "National Center for Biotechnology Information." [Online]. Available:  
23  
24 519 <https://www.ncbi.nlm.nih.gov/>. [Accessed: 05-Sep-2018].  
25
- 26 520 [32] IGV-page, "Home | Integrative Genomics Viewer." [Online]. Available:  
27  
28 521 <http://software.broadinstitute.org/software/igv/>. [Accessed: 05-Sep-2018].  
29
- 30 522 [33] NCBI.dbSNP, "dbSNP." [Online]. Available: <https://www.ncbi.nlm.nih.gov/projects/SNP/>. [Accessed:  
31  
32 523 10-Oct-2018].  
33
- 34 524 [34] PlasmoDB, "PlasmoDB : The Plasmodium Genomics Resource." [Online]. Available:  
35  
36 525 <http://plasmodb.org/plasmo/>. [Accessed: 10-Oct-2018].  
37  
38
- 39 526 [35] L. R. Runtuwene, J. S. B. Tuda, A. E. Mongan, W. Makalowski, M. C. Frith, M. Imwong, S. Srisutham, L.  
40  
41 527 A. Nguyen Thi, N. N. Tuan, Y. Eshita, R. Maeda, J. Yamagishi, and Y. Suzuki, "Nanopore sequencing of  
42  
43 528 drug-resistance-associated genes in malaria parasites, *Plasmodium falciparum*," *Sci. Rep.*, vol. 8, no.  
44  
45 529 1, p. 8286, Dec. 2018.  
46
- 47 530 [36] C. Gattazzo, V. Martini, F. Frezzato, V. Trimarco, E. Tibaldi, M. Castelli, M. Facco, F. Zonta, A. M.  
48  
49 531 Brunati, R. Zambello, G. Semenzato, and L. Trentin, "Cortactin, another player in the Lyn signaling  
50  
51 532 pathway, is over-expressed and alternatively spliced in leukemic cells from patients with B-cell  
52  
53 533 chronic lymphocytic leukemia," *Haematologica*, vol. 99, no. 6, pp. 1069-77, Jun. 2014.  
54
- 55 534 [37] T. A. Lantto, I. Laakso, H. J. D. Dorman, T. Mauriala, R. Hiltunen, S. Kõks, and A. Raasmaja, "Cellular  
56  
57 535 Stress and p53-Associated Apoptosis by *Juniperus communis* L. Berry Extract Treatment in the  
58  
59 536 Human SH-SY5Y Neuroblastoma Cells," *Int. J. Mol. Sci.*, vol. 17, no. 7, Jul. 2016.  
60  
61  
62  
63  
64  
65



537 [38] A. Suzuki, M. Suzuki, J. Mizushima-Sugano, M. C. Frith, W. Makalowski, T. Kohno, S. Sugano, K.  
1  
2 538 Tsuchihara, and Y. Suzuki, "Sequencing and phasing cancer mutations in lung cancers using a long-  
3  
4 539 read portable sequencer," *DNA Res.*, vol. 24, no. 6, pp. 585–596, Dec. 2017.  
5

6 540

7  
8  
9  
10  
11  
12  
13  
14  
15  
16  
17  
18  
19  
20  
21  
22  
23  
24  
25  
26  
27  
28  
29  
30  
31  
32  
33  
34  
35  
36  
37  
38  
39  
40  
41  
42  
43  
44  
45  
46  
47  
48  
49  
50  
51  
52  
53  
54  
55  
56  
57  
58  
59  
60  
61  
62  
63  
64  
65

Figure1

[Click here to download Figure Picture1.pdf](#)

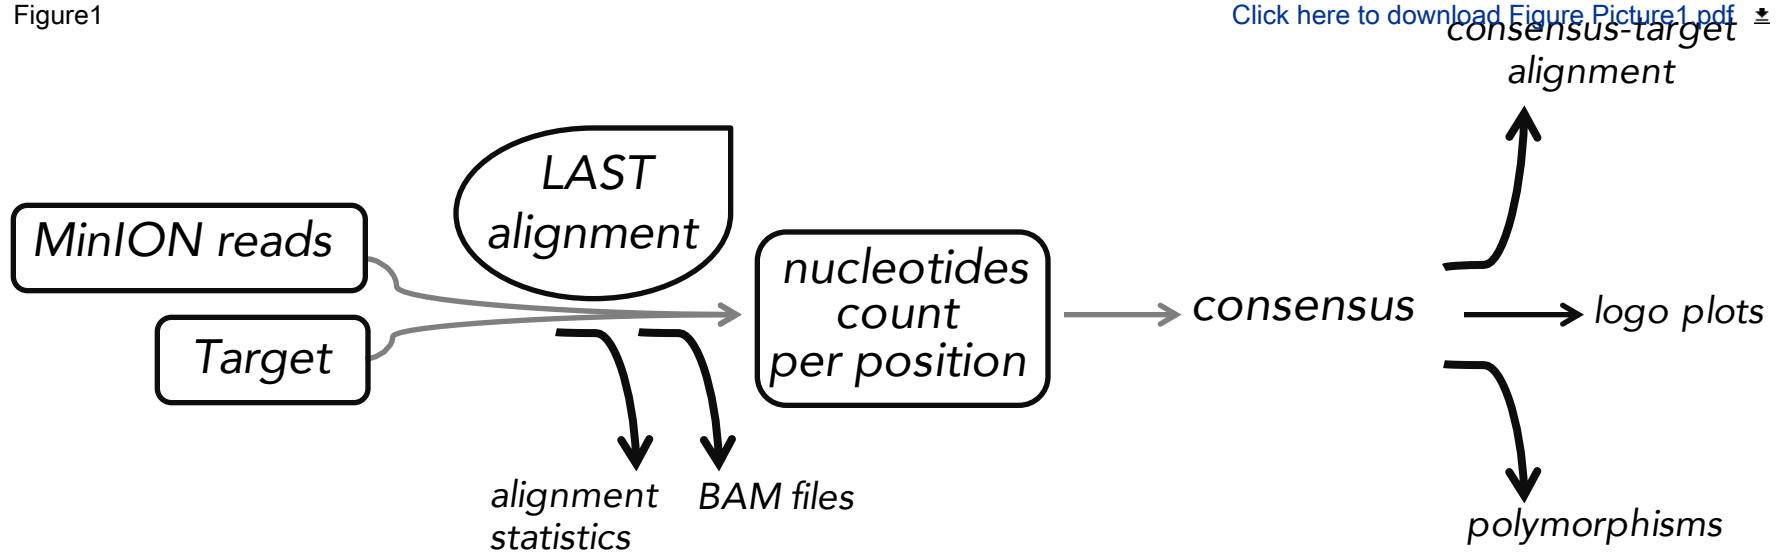

| Position | A   | C   | G | T   | Target | Matches in PlasmoDB                            | P-error (local alignment quality) | raw A | raw C | raw G | raw T |
|----------|-----|-----|---|-----|--------|------------------------------------------------|-----------------------------------|-------|-------|-------|-------|
| 403612   | 1.0 | -   | - | -   | t      | NGS_SNP.Pf3D7_07_v3.403612:<br>T:0.98 + A:0.02 | 0.0061                            | 4363  | 13    | 76    | 440   |
| 403625   | -   | 1.0 | - | -   | a      | NGS_SNP.Pf3D7_07_v3.403625:<br>C:0.65 + A:0.35 | 0.0068                            | 419   | 4817  | 31    | 18    |
| 404407   | -   | -   | - | 1.0 | g      | NGS_SNP.Pf3D7_07_v3.404407:<br>T:0.72 + G:0.28 | 0.0036                            | 16    | 37    | 200   | 4650  |

B

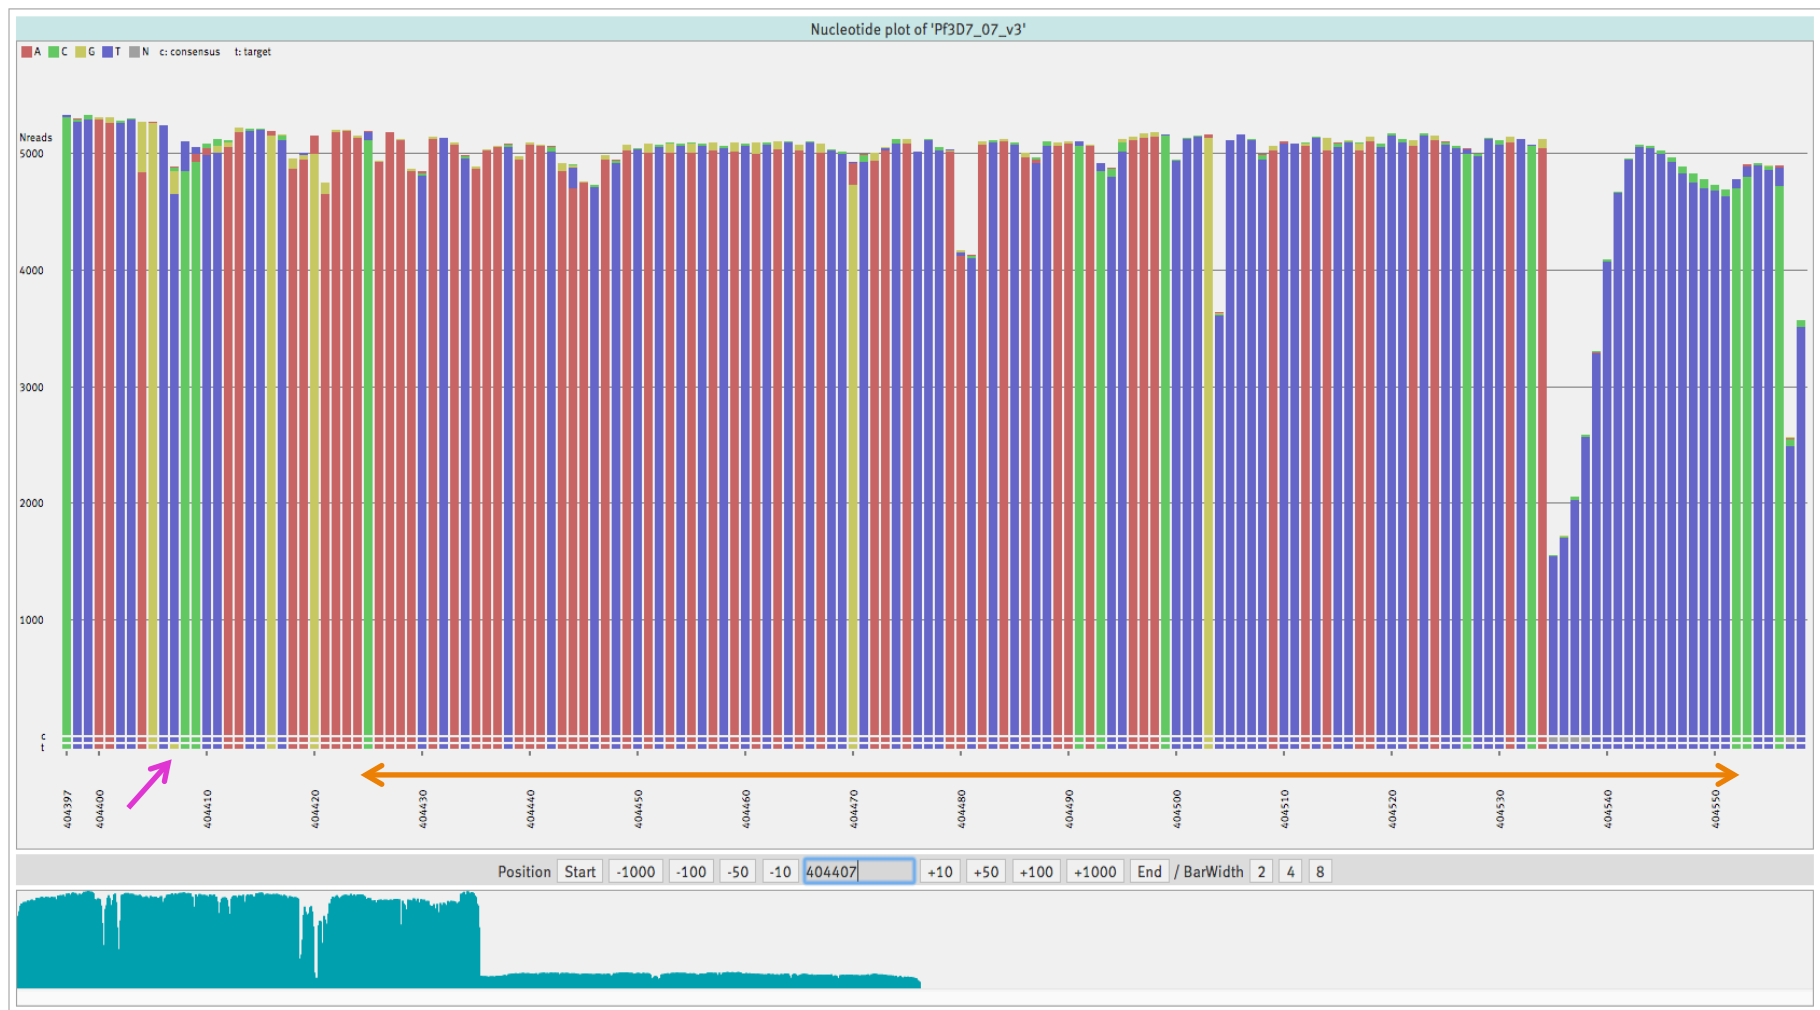

Figure4

| Position | A   | C   | G   | T   | Target | Matches in dbSNP     | P-error (local alignment quality) | raw A  | raw C | raw G | raw T  |
|----------|-----|-----|-----|-----|--------|----------------------|-----------------------------------|--------|-------|-------|--------|
| 55173958 | -   | -   | 1.0 | -   | a      |                      | 0.0027                            | 104623 | 1304  | 38751 | 753    |
| 55181370 | 1.0 | -   | -   | -   | g      | rs1050171: G/A+G/C   | 0.0008                            | 114375 | 5449  | 75568 | 3831   |
| 55181378 | -   | -   | -   | 1.0 | c      | rs121434569: C/T     | 0.0007                            | 1423   | 65474 | 2980  | 128968 |
| 55191822 | -   | -   | 1.0 | -   | t      | rs121434568: T/A+T/G | 0.0013                            | 19653  | 10419 | 75524 | 59396  |
| 55192839 | -   | -   | 1.0 | -   | a      | rs376176117: A/T     | 0.0695                            | 70026  | 211   | 18566 | 37     |
| 55198724 | -   | 1.0 | -   | -   | t      | rs1140475: T/A+T/C   | 0.0563                            | 1723   | 72518 | 896   | 49645  |

B

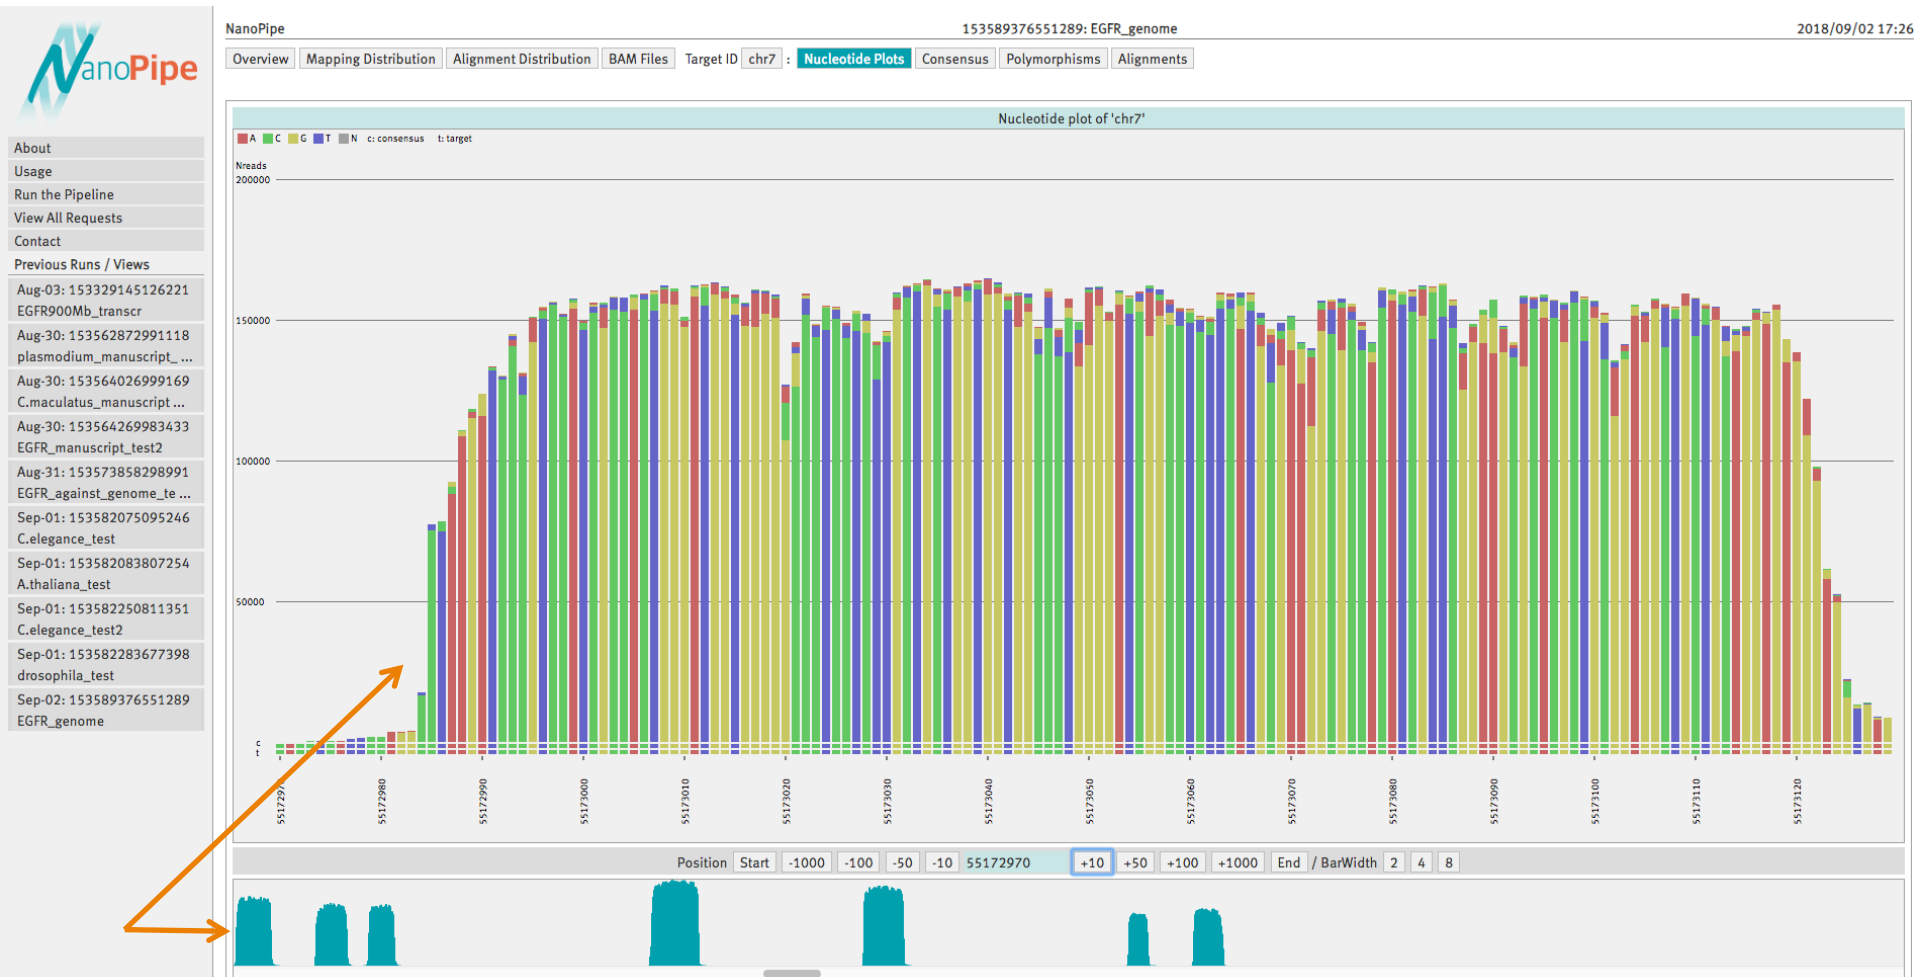

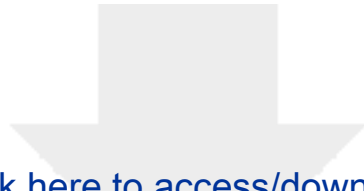

Click here to access/download

**Supplementary Material**

NanoPipe\_Supplementary.pdf

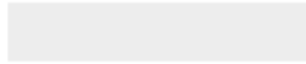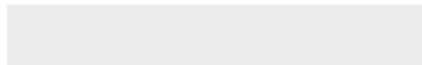

Supplement: giy169_giga-d-18-00394_original_submission.pdf [file giy169_giga-d-18-00394_original_submission.pdf]
