# Supplementary material for: NanoPipe—a web server for nanopore MinION sequencing data analysis
Source: PubMed Central journal article supplement (PMC6377397; doi:10.1093/gigascience/giy169), 2019-01-24

|                                                      |                                                                                                                                                                                                                                                                                                                                                                                                                                                                                                                                                                                                                                                                                                                                                                                                                                                                                                                                                                                                                                                                                                                                                                                                                                                                                                                                                                                                                                                                                                                                                                                                                                                                                                                                                                                                                                                                                                                                                              |                         |
|------------------------------------------------------|--------------------------------------------------------------------------------------------------------------------------------------------------------------------------------------------------------------------------------------------------------------------------------------------------------------------------------------------------------------------------------------------------------------------------------------------------------------------------------------------------------------------------------------------------------------------------------------------------------------------------------------------------------------------------------------------------------------------------------------------------------------------------------------------------------------------------------------------------------------------------------------------------------------------------------------------------------------------------------------------------------------------------------------------------------------------------------------------------------------------------------------------------------------------------------------------------------------------------------------------------------------------------------------------------------------------------------------------------------------------------------------------------------------------------------------------------------------------------------------------------------------------------------------------------------------------------------------------------------------------------------------------------------------------------------------------------------------------------------------------------------------------------------------------------------------------------------------------------------------------------------------------------------------------------------------------------------------|-------------------------|
| <b>Manuscript Number:</b>                            | GIGA-D-18-00394R1                                                                                                                                                                                                                                                                                                                                                                                                                                                                                                                                                                                                                                                                                                                                                                                                                                                                                                                                                                                                                                                                                                                                                                                                                                                                                                                                                                                                                                                                                                                                                                                                                                                                                                                                                                                                                                                                                                                                            |                         |
| <b>Full Title:</b>                                   | NanoPipe - a web server for nanopore MinION sequencing data analysis                                                                                                                                                                                                                                                                                                                                                                                                                                                                                                                                                                                                                                                                                                                                                                                                                                                                                                                                                                                                                                                                                                                                                                                                                                                                                                                                                                                                                                                                                                                                                                                                                                                                                                                                                                                                                                                                                         |                         |
| <b>Article Type:</b>                                 | Technical Note                                                                                                                                                                                                                                                                                                                                                                                                                                                                                                                                                                                                                                                                                                                                                                                                                                                                                                                                                                                                                                                                                                                                                                                                                                                                                                                                                                                                                                                                                                                                                                                                                                                                                                                                                                                                                                                                                                                                               |                         |
| <b>Funding Information:</b>                          | Medizinische Fakultät, Westfälische Wilhelms-Universität Münster (n/a)                                                                                                                                                                                                                                                                                                                                                                                                                                                                                                                                                                                                                                                                                                                                                                                                                                                                                                                                                                                                                                                                                                                                                                                                                                                                                                                                                                                                                                                                                                                                                                                                                                                                                                                                                                                                                                                                                       | Dr. Wojciech Makalowski |
| <b>Abstract:</b>                                     | <p><b>Background</b></p> <p>The fast-moving progress of the third generation long read sequencing technologies will soon bring the biological and medical sciences to a new era of research. Altogether the technique and experimental procedures are becoming more straightforward and available to biologists from diverse fields, even without any profound experience in DNA sequencing. Thus, the introduction of the MinION™ device by Oxford Nanopore Technologies promises to “bring sequencing technology to the masses” and also allows quick and operative analysis in field studies. However, the convenience of this sequencing technology dramatically contrasts with the available analysis tools, which may significantly reduce enthusiasm of a “regular” user. To really bring the sequencing technology to every biologist, we need a set of user-friendly tools that can perform a powerful analysis in an automatic manner.</p> <p><b>Findings</b></p> <p>NanoPipe was developed in consideration of the specifics of the MinION™ sequencing technologies, providing accordingly adjusted alignment parameters. The range of the target species/sequences for the alignment is not limited, and the descriptive usage page of NanoPipe helps a user to succeed with NanoPipe analysis. The results contain alignment statistics, consensus sequence, polymorphisms data, and visualization of the alignment. Several test cases are used to demonstrate efficiency of the tool.</p> <p><b>Conclusions</b></p> <p>Freely available NanoPipe software allows effortless and reliable analysis of MinION™ sequencing data for experienced bioinformaticians, as well for wet-lab biologists with minimum bioinformatics knowledge. Moreover, for the latter group, we describe the basic algorithm of actions necessary for MinION™ sequencing analysis from the first to last step.</p> <p><b>Issue Section</b></p> <p>TECHNICAL NOTE</p> |                         |
| <b>Corresponding Author:</b>                         | Wojciech Makalowski<br>Univeristy of Münster<br>Münster, GERMANY                                                                                                                                                                                                                                                                                                                                                                                                                                                                                                                                                                                                                                                                                                                                                                                                                                                                                                                                                                                                                                                                                                                                                                                                                                                                                                                                                                                                                                                                                                                                                                                                                                                                                                                                                                                                                                                                                             |                         |
| <b>Corresponding Author Secondary Information:</b>   |                                                                                                                                                                                                                                                                                                                                                                                                                                                                                                                                                                                                                                                                                                                                                                                                                                                                                                                                                                                                                                                                                                                                                                                                                                                                                                                                                                                                                                                                                                                                                                                                                                                                                                                                                                                                                                                                                                                                                              |                         |
| <b>Corresponding Author's Institution:</b>           | Univeristy of Münster                                                                                                                                                                                                                                                                                                                                                                                                                                                                                                                                                                                                                                                                                                                                                                                                                                                                                                                                                                                                                                                                                                                                                                                                                                                                                                                                                                                                                                                                                                                                                                                                                                                                                                                                                                                                                                                                                                                                        |                         |
| <b>Corresponding Author's Secondary Institution:</b> |                                                                                                                                                                                                                                                                                                                                                                                                                                                                                                                                                                                                                                                                                                                                                                                                                                                                                                                                                                                                                                                                                                                                                                                                                                                                                                                                                                                                                                                                                                                                                                                                                                                                                                                                                                                                                                                                                                                                                              |                         |
| <b>First Author:</b>                                 | Victoria Shabardina                                                                                                                                                                                                                                                                                                                                                                                                                                                                                                                                                                                                                                                                                                                                                                                                                                                                                                                                                                                                                                                                                                                                                                                                                                                                                                                                                                                                                                                                                                                                                                                                                                                                                                                                                                                                                                                                                                                                          |                         |
| <b>First Author Secondary Information:</b>           |                                                                                                                                                                                                                                                                                                                                                                                                                                                                                                                                                                                                                                                                                                                                                                                                                                                                                                                                                                                                                                                                                                                                                                                                                                                                                                                                                                                                                                                                                                                                                                                                                                                                                                                                                                                                                                                                                                                                                              |                         |
| <b>Order of Authors:</b>                             | Victoria Shabardina                                                                                                                                                                                                                                                                                                                                                                                                                                                                                                                                                                                                                                                                                                                                                                                                                                                                                                                                                                                                                                                                                                                                                                                                                                                                                                                                                                                                                                                                                                                                                                                                                                                                                                                                                                                                                                                                                                                                          |                         |

|                                                |                                                                                                                                                                                                                                                                                                                                                                                                                                                                                                                                                                                                                                                                                                                                                                                                                                                                                                                                                                                                                                                                                                                                                                                                                                                                                                                                                                                                                                                                                                                                                                                                                                                                                                                                                                                                                                                                                                                                                                                                                                                                                                                                                                                                                                                                                                                                                                                                                                                                                                                                                                                                                                                                                                                                                                                                                                                                                                                                                                                                                                                                                                                                                                                                                                                                             |
|------------------------------------------------|-----------------------------------------------------------------------------------------------------------------------------------------------------------------------------------------------------------------------------------------------------------------------------------------------------------------------------------------------------------------------------------------------------------------------------------------------------------------------------------------------------------------------------------------------------------------------------------------------------------------------------------------------------------------------------------------------------------------------------------------------------------------------------------------------------------------------------------------------------------------------------------------------------------------------------------------------------------------------------------------------------------------------------------------------------------------------------------------------------------------------------------------------------------------------------------------------------------------------------------------------------------------------------------------------------------------------------------------------------------------------------------------------------------------------------------------------------------------------------------------------------------------------------------------------------------------------------------------------------------------------------------------------------------------------------------------------------------------------------------------------------------------------------------------------------------------------------------------------------------------------------------------------------------------------------------------------------------------------------------------------------------------------------------------------------------------------------------------------------------------------------------------------------------------------------------------------------------------------------------------------------------------------------------------------------------------------------------------------------------------------------------------------------------------------------------------------------------------------------------------------------------------------------------------------------------------------------------------------------------------------------------------------------------------------------------------------------------------------------------------------------------------------------------------------------------------------------------------------------------------------------------------------------------------------------------------------------------------------------------------------------------------------------------------------------------------------------------------------------------------------------------------------------------------------------------------------------------------------------------------------------------------------------|
|                                                | Tabea Kischka                                                                                                                                                                                                                                                                                                                                                                                                                                                                                                                                                                                                                                                                                                                                                                                                                                                                                                                                                                                                                                                                                                                                                                                                                                                                                                                                                                                                                                                                                                                                                                                                                                                                                                                                                                                                                                                                                                                                                                                                                                                                                                                                                                                                                                                                                                                                                                                                                                                                                                                                                                                                                                                                                                                                                                                                                                                                                                                                                                                                                                                                                                                                                                                                                                                               |
|                                                | Felix Manske                                                                                                                                                                                                                                                                                                                                                                                                                                                                                                                                                                                                                                                                                                                                                                                                                                                                                                                                                                                                                                                                                                                                                                                                                                                                                                                                                                                                                                                                                                                                                                                                                                                                                                                                                                                                                                                                                                                                                                                                                                                                                                                                                                                                                                                                                                                                                                                                                                                                                                                                                                                                                                                                                                                                                                                                                                                                                                                                                                                                                                                                                                                                                                                                                                                                |
|                                                | Norbert Grundmann                                                                                                                                                                                                                                                                                                                                                                                                                                                                                                                                                                                                                                                                                                                                                                                                                                                                                                                                                                                                                                                                                                                                                                                                                                                                                                                                                                                                                                                                                                                                                                                                                                                                                                                                                                                                                                                                                                                                                                                                                                                                                                                                                                                                                                                                                                                                                                                                                                                                                                                                                                                                                                                                                                                                                                                                                                                                                                                                                                                                                                                                                                                                                                                                                                                           |
|                                                | Martin C. Frith                                                                                                                                                                                                                                                                                                                                                                                                                                                                                                                                                                                                                                                                                                                                                                                                                                                                                                                                                                                                                                                                                                                                                                                                                                                                                                                                                                                                                                                                                                                                                                                                                                                                                                                                                                                                                                                                                                                                                                                                                                                                                                                                                                                                                                                                                                                                                                                                                                                                                                                                                                                                                                                                                                                                                                                                                                                                                                                                                                                                                                                                                                                                                                                                                                                             |
|                                                | Yutaka Suzuki                                                                                                                                                                                                                                                                                                                                                                                                                                                                                                                                                                                                                                                                                                                                                                                                                                                                                                                                                                                                                                                                                                                                                                                                                                                                                                                                                                                                                                                                                                                                                                                                                                                                                                                                                                                                                                                                                                                                                                                                                                                                                                                                                                                                                                                                                                                                                                                                                                                                                                                                                                                                                                                                                                                                                                                                                                                                                                                                                                                                                                                                                                                                                                                                                                                               |
|                                                | Wojciech Makalowski                                                                                                                                                                                                                                                                                                                                                                                                                                                                                                                                                                                                                                                                                                                                                                                                                                                                                                                                                                                                                                                                                                                                                                                                                                                                                                                                                                                                                                                                                                                                                                                                                                                                                                                                                                                                                                                                                                                                                                                                                                                                                                                                                                                                                                                                                                                                                                                                                                                                                                                                                                                                                                                                                                                                                                                                                                                                                                                                                                                                                                                                                                                                                                                                                                                         |
| <b>Order of Authors Secondary Information:</b> |                                                                                                                                                                                                                                                                                                                                                                                                                                                                                                                                                                                                                                                                                                                                                                                                                                                                                                                                                                                                                                                                                                                                                                                                                                                                                                                                                                                                                                                                                                                                                                                                                                                                                                                                                                                                                                                                                                                                                                                                                                                                                                                                                                                                                                                                                                                                                                                                                                                                                                                                                                                                                                                                                                                                                                                                                                                                                                                                                                                                                                                                                                                                                                                                                                                                             |
| <b>Response to Reviewers:</b>                  | <p>Reply to reviewers' commentaries for Submission GIGA-D-18-00394</p> <p>Dear Editor,<br/> Thank you very much for processing our manuscript and giving the opportunity to work on its flaws and send the improved version. We also would like to thank the reviewers for the valuable criticism and attentive reading of the presented work. Their comments helped to improve our manuscript significantly. We hope that our replies and corresponding revisions of the manuscript are satisfactory and you will find the manuscript ready for publication at the GigaScience journal.</p> <p>Sincerely,<br/> Wojciech Makalowski</p> <p>Reviewer 1.<br/> Comment 1. A rather serious disagreement between the text and the web software is the set of reference genomes; the github archive appears to have no reference genomes. The manuscript claims 12 database and the 7 offered on the website don't fully overlap that set.</p> <p>Reply: The manuscript and the NanoPipe menu, both, offer 9 pre-processed targets (page 8 of the manuscript): for human (hg38), RefSeq accession GCF_000001405.38; Escherichia coli, RefSeq accession GCF_000005845.2; Caenorhabditis elegans, RefSeq accession GCF_000002985.6; Drosophila melanogaster, RefSeq accession GCF_000001215.4; Mus musculus, RefSeq accession GCF_000001635.26; Arabidopsis thaliana, RefSeq accession GCF_000001735.4; Plasmodium falciparum strain 3D7, downloaded from plasmodb.org, version=2013-03-01; a representative genome for Camponotus floridanus, RefSeq accession GCF_003227725.1; and Dengue virus genome variants for serotyping (NC_001477.1, NC_001474.2, NC_001475.2 and NC_002640.1 for variant 1, variant 2, variant 3 and variant 4, respectively).</p> <p>It is a good idea to keep all the information about targets in github repository: the list of targets and their source were added to the directory <a href="https://github.com/IOB-Muenster/nanopipe2/targets">https://github.com/IOB-Muenster/nanopipe2/targets</a></p> <p>Comment 2. I tried uploading a small set of E.coli reads and an E.coli reference (one of the manuscript-promised, not-on-server cases!) but I seem to be permanently parked behind two other jobs.<br/> And Comment 3. The website has a "View Testcase" button -- that yields an error message screen.</p> <p>Reply: We have tried the test case and the job run from the different computers, locations and web browsers and did not encounter any problems. Is it possible that the errors that the reviewer was experiencing had happened due to the local internet connection? What internet browser the reviewer used?</p> <p>Comment 4. Similarly, the github package does not appear to contain a useful test case or any code to check the installation except running the package -- so if anything goes wrong it could be difficult for a novice to determine which of the long list of dependencies (11 Perl modules, 9 Python modules, 2 other tools)</p> <p>Reply: The installation package deposited at github is aimed at users with some bioinformatics and coding knowledge and who would want to explore and modify the tool themselves. The novice users are offered to use the online version. Nevertheless,</p> |

we thank the reviewer for this comment and agree that, indeed, it is helpful to know what has gone wrong, if anything has. We introduce the following improvements in the installation package:

- 1) The installation script has been written with the complementary explanations, please, see <https://github.com/IOB-Muenster/nanopipe2/blob/master/install.sh> and <https://github.com/IOB-Muenster/nanopipe2/blob/master/install.txt>
- 2) The check.sh script at the same directory (<https://github.com/IOB-Muenster/nanopipe2>) has been written for a user to be able to monitor if all the required packages are present on the user's computer.
- 3) A testcase has been deposited to check if the installation was successful. The install.txt file on the github repository includes description how to run the testcase. If the test script gives any errors, the user should double check the installation procedure and/or contact us via "Contact" option on the NanoPipe web page).

Comment 5. The authors might also consider distributing as a docker container and/or conda package with all dependencies covered.

Reply: Docker and conda are the good solutions for an installation packages, nevertheless we think that our install.sh script on github is covering well all the necessities. Besides, the accent of the tool is on its online application.

Comment 6. Streamlining the process of creating a new target database would be desirable -- the "install.txt" file gives a 5 step protocol -- two of which should be combined ("Create the target database" & "target.fasta". The lastdb step really should be wrapped in something that checks the new database information for consistency

Reply: The createtarget.sh script has been added to the <https://github.com/IOB-Muenster/nanopipe2> github directory. It simplifies the target generation process. The explanation of usage can be found in the install.txt document.

Reviewer 2.

Part 1. Notes about the ONT technology

Thank you very much for the suggestions related to the introduction part; the facts from the Clive Brown's talk are, indeed, very exciting. Although we don't think that all the technical details should be included in our manuscript, since it is aimed at the broad audience, we have modified the text accordingly to give the general impression about the technology progressing. Please, see lines 59-61 and 75-77

Part2.

Comment 1. Introduction doesn't mention Metrichor, despite using TM in where MinION is used.

Reply: thank you for noting this, we filled that gap (line 82).

Comment 2. "for whole genome sequencing by MinION TM a researcher can expect read lengths up to several thousand nucleotides"  
- longest read observed so far is 2.3 \*million\* nucleotides.

Reply: This information has been corrected (line 208).

Comment 3. MAP005/MAP006 kits and MAP003 flow cell in line 245 suggest a very old kit (~2-3 years old). This is unusual for a paper about to be published, but is consistent with one other GigaScience paper that I've seen (?Sara Goodwin). I'd be interested to know how long this paper languished in pre-review doldrums until GigaScience accepted it for sending out to reviewers. And: Line 270 for H1975 suggests SQK-LSK108/FLO-MIN107 R9; a bit more recent (but still old).

Reply: Indeed, the flow cells used for some experiments were not of the latest version. It depended on the collaboration we had had with the wet labs and the work progress. Nevertheless, the usage of not so recent flow cells in regard to the software development brings more robustness to the analysis, since the sequencing precision in this case is worse than with the newest equipment. We were able to show that the data

|                                                                                                                                                                                                                                                                           |                                                                                                                                                                                                                                                                                                                                                                                                                                                                                                                                                                                                                                                                                                                                                                                                                                                                                                                                                                                                                                                                                                                                                                                                                                                                                                                                                                                                                                                                                                                                                                                                                                                                                                                                                                                                                                                                                                                                                                                                                                                                                                                                                                                                                                                                                                                                                                                                                                                                                                                                                                                                                                                                                                                                                                                                                                                                                   |
|---------------------------------------------------------------------------------------------------------------------------------------------------------------------------------------------------------------------------------------------------------------------------|-----------------------------------------------------------------------------------------------------------------------------------------------------------------------------------------------------------------------------------------------------------------------------------------------------------------------------------------------------------------------------------------------------------------------------------------------------------------------------------------------------------------------------------------------------------------------------------------------------------------------------------------------------------------------------------------------------------------------------------------------------------------------------------------------------------------------------------------------------------------------------------------------------------------------------------------------------------------------------------------------------------------------------------------------------------------------------------------------------------------------------------------------------------------------------------------------------------------------------------------------------------------------------------------------------------------------------------------------------------------------------------------------------------------------------------------------------------------------------------------------------------------------------------------------------------------------------------------------------------------------------------------------------------------------------------------------------------------------------------------------------------------------------------------------------------------------------------------------------------------------------------------------------------------------------------------------------------------------------------------------------------------------------------------------------------------------------------------------------------------------------------------------------------------------------------------------------------------------------------------------------------------------------------------------------------------------------------------------------------------------------------------------------------------------------------------------------------------------------------------------------------------------------------------------------------------------------------------------------------------------------------------------------------------------------------------------------------------------------------------------------------------------------------------------------------------------------------------------------------------------------------|
|                                                                                                                                                                                                                                                                           | <p>processing with FLO-MAP003 and FLO-MIN107 flow cells provide with the reliable results. That ensures that the modern flow cells and sequencing kits will be not worse.</p> <p>Comment 4. Line 292 -- what's the "standard procedures" for poly-A RNA extraction? Was this using poly-A bead selection? Why not strand switch sequencing with ONT adapters (available/recommended in ONT protocols from August 2017)?</p> <p>Reply: We thank the reviewer for this comment: indeed, we happened not to be very precise in the description. The details about the RNA extraction has been added: please, refer to lines 297-298. We chose to use poly-A bead extraction method, because this procedure was optimized in our collaborators' lab to succeed with the RNA extraction from ant material. As the work with insect tissues is prone to difficulties, we did not want to change the established work flow in the lab that have expertise in working with ant species.</p> <p>Comment 5. Given that this is a paper about *software*, I can't see any obvious reason why new samples were sequenced. It'd be nice to see this algorithm applied to recent large public human datasets (e.g. nanopore-wgs-consortium: ultra-long-read runs, or full-length RNA/cDNA runs). Reads can be subset, as necessary, to cover particular genomic regions. This will help encourage people to use existing public datasets for their own software.</p> <p>Reply: Following the suggestions of the reviewer and the editor we have added one more test case on the recently published direct RNA long read sequencing data of Vaccinia virus and its host. Please, see lines 308-319. The jobs IDs are 154401029652282 (mapped to the green monkey (host) genome) and 154400756783780 (mapped to the virus genome).</p> <p>Comment 6. Text mentions that NanoPipe was used in Bangkok in 2017, but the github commits only go back to September 18 this year. Is there any reason why NanoPipe wasn't version controlled in 2017?</p> <p>Reply: We were running NanoPipe through the series of tests and changes in 2017, that's why the github page was not created back then yet. The tool was at beta-version.</p> <p>Comment 7. Note: IUPAC annotation for any of four nucleotides is 'N', not 'X' [<a href="https://github.com/IOB-Muenster/nanopipe2/blob/f2026e16b8942ec1cb60157b032a9c4bcbfebef7/modules/nanopipe2/calculate/analyze.pm#L341">https://github.com/IOB-Muenster/nanopipe2/blob/f2026e16b8942ec1cb60157b032a9c4bcbfebef7/modules/nanopipe2/calculate/analyze.pm#L341</a>] [<a href="https://www.bioinformatics.org/sms/iupac.html">https://www.bioinformatics.org/sms/iupac.html</a>]</p> <p>Reply: This, indeed, is different from IUPAC symbols. The issue is clarified in the manuscript, line 228, and in the usage explanations within the NanoPipe.</p> |
| <b>Additional Information:</b>                                                                                                                                                                                                                                            |                                                                                                                                                                                                                                                                                                                                                                                                                                                                                                                                                                                                                                                                                                                                                                                                                                                                                                                                                                                                                                                                                                                                                                                                                                                                                                                                                                                                                                                                                                                                                                                                                                                                                                                                                                                                                                                                                                                                                                                                                                                                                                                                                                                                                                                                                                                                                                                                                                                                                                                                                                                                                                                                                                                                                                                                                                                                                   |
| <b>Question</b>                                                                                                                                                                                                                                                           | <b>Response</b>                                                                                                                                                                                                                                                                                                                                                                                                                                                                                                                                                                                                                                                                                                                                                                                                                                                                                                                                                                                                                                                                                                                                                                                                                                                                                                                                                                                                                                                                                                                                                                                                                                                                                                                                                                                                                                                                                                                                                                                                                                                                                                                                                                                                                                                                                                                                                                                                                                                                                                                                                                                                                                                                                                                                                                                                                                                                   |
| Are you submitting this manuscript to a special series or article collection?                                                                                                                                                                                             | No                                                                                                                                                                                                                                                                                                                                                                                                                                                                                                                                                                                                                                                                                                                                                                                                                                                                                                                                                                                                                                                                                                                                                                                                                                                                                                                                                                                                                                                                                                                                                                                                                                                                                                                                                                                                                                                                                                                                                                                                                                                                                                                                                                                                                                                                                                                                                                                                                                                                                                                                                                                                                                                                                                                                                                                                                                                                                |
| <b>Experimental design and statistics</b>                                                                                                                                                                                                                                 | Yes                                                                                                                                                                                                                                                                                                                                                                                                                                                                                                                                                                                                                                                                                                                                                                                                                                                                                                                                                                                                                                                                                                                                                                                                                                                                                                                                                                                                                                                                                                                                                                                                                                                                                                                                                                                                                                                                                                                                                                                                                                                                                                                                                                                                                                                                                                                                                                                                                                                                                                                                                                                                                                                                                                                                                                                                                                                                               |
| Full details of the experimental design and statistical methods used should be given in the Methods section, as detailed in our <a href="#">Minimum Standards Reporting Checklist</a> . Information essential to interpreting the data presented should be made available |                                                                                                                                                                                                                                                                                                                                                                                                                                                                                                                                                                                                                                                                                                                                                                                                                                                                                                                                                                                                                                                                                                                                                                                                                                                                                                                                                                                                                                                                                                                                                                                                                                                                                                                                                                                                                                                                                                                                                                                                                                                                                                                                                                                                                                                                                                                                                                                                                                                                                                                                                                                                                                                                                                                                                                                                                                                                                   |

|                                                                                                                                                                                                                                                                                                                                                                                                                                                                                                                                                         |            |
|---------------------------------------------------------------------------------------------------------------------------------------------------------------------------------------------------------------------------------------------------------------------------------------------------------------------------------------------------------------------------------------------------------------------------------------------------------------------------------------------------------------------------------------------------------|------------|
| <p>in the figure legends.</p> <p>Have you included all the information requested in your manuscript?</p>                                                                                                                                                                                                                                                                                                                                                                                                                                                |            |
| <p><b>Resources</b></p> <p>A description of all resources used, including antibodies, cell lines, animals and software tools, with enough information to allow them to be uniquely identified, should be included in the Methods section. Authors are strongly encouraged to cite <a href="#">Research Resource Identifiers</a> (RRIDs) for antibodies, model organisms and tools, where possible.</p> <p>Have you included the information requested as detailed in our <a href="#">Minimum Standards Reporting Checklist</a>?</p>                     | <p>Yes</p> |
| <p><b>Availability of data and materials</b></p> <p>All datasets and code on which the conclusions of the paper rely must be either included in your submission or deposited in <a href="#">publicly available repositories</a> (where available and ethically appropriate), referencing such data using a unique identifier in the references and in the “Availability of Data and Materials” section of your manuscript.</p> <p>Have you have met the above requirement as detailed in our <a href="#">Minimum Standards Reporting Checklist</a>?</p> | <p>Yes</p> |

[Click here to view linked References](#)

1  
2  
3  
4  
5  
6  
7  
8  
9  
10  
11  
12  
13  
14  
15  
16  
17  
18  
19  
20  
21  
22  
23  
24  
25  
26  
27  
28  
29  
30  
31  
32  
33  
34  
35  
36  
37  
38  
39  
40  
41  
42  
43  
44  
45  
46  
47  
48  
49  
50  
51  
52  
53  
54  
55  
56  
57  
58  
59  
60  
61  
62  
63  
64  
65

1  
2  
3  
4  
5  
6  
7  
8  
9  
10  
11  
12  
13  
14  
15  
16  
17  
18  
19  
20  
21  
22  
23  
24  
25  
26  
27  
28  
29  
30  
31  
32  
33  
34  
35  
36  
37  
38  
39  
40  
41  
42  
43  
44  
45  
46  
47  
48  
49  
50  
51  
52  
53  
54  
55  
56  
57  
58  
59  
60  
61  
62  
63  
64  
65

# NanoPipe - a web server for nanopore MinION sequencing data analysis

Victoria Shabardina<sup>1</sup>, Tabea Kischka<sup>1</sup>, Felix Manske<sup>1</sup>, Norbert Grundmann<sup>1</sup>, Martin C.  
Frith<sup>2,3,4</sup>, Yutaka Suzuki<sup>5</sup>, and Wojciech Makalowski<sup>1</sup>

<sup>1</sup> Institute of Bioinformatics, University of Muenster, Germany

<sup>2</sup> Artificial Intelligence Research Center, AIST, Japan

<sup>3</sup> Department of Computational Biology and Medical Sciences, The University of Tokyo,  
Japan

<sup>4</sup> AIST-Waseda University Computational Bio Big Data Open Innovation Laboratory, Japan

<sup>5</sup> Laboratory of Systems Genomics, Department of Computational Biology and Medical  
Sciences, The University of Tokyo

Corresponding author: Wojciech Makalowski, [wojmak@uni-muenster.de](mailto:wojmak@uni-muenster.de)

ORCIDs: Tabea Kischka: 0000-0002-7117-5575; Martin C. Frith: 0000-0003-0998-2859;

Wojciech Makalowski: 0000-0003-2303-9541

21 **Abstract**

22 *Background:* The fast-moving progress of the third generation long read sequencing  
23 technologies will soon bring the biological and medical sciences to a new era of research.  
24 Altogether the technique and experimental procedures are becoming more  
25 straightforward and available to biologists from diverse fields, even without any profound  
26 experience in DNA sequencing. Thus, the introduction of the MinION™ device by Oxford  
27 Nanopore Technologies promises to “bring sequencing technology to the masses” and  
28 also allows quick and operative analysis in field studies. However, the convenience of this  
29 sequencing technology dramatically contrasts with the available analysis tools, which  
30 may significantly reduce enthusiasm of a “regular” user. To really bring the sequencing  
31 technology to every biologist, we need a set of user-friendly tools that can perform a  
32 powerful analysis in an automatic manner.

33 *Findings:* NanoPipe was developed in consideration of the specifics of the MinION™  
34 sequencing technologies, providing accordingly adjusted alignment parameters. The  
35 range of the target species/sequences for the alignment is not limited, and the descriptive  
36 usage page of NanoPipe helps a user to succeed with NanoPipe analysis. The results  
37 contain alignment statistics, consensus sequence, polymorphisms data, and visualization  
38 of the alignment. Several test cases are used to demonstrate efficiency of the tool.

39 *Conclusions:* Freely available NanoPipe software allows effortless and reliable analysis of  
40 MinION™ sequencing data for experienced bioinformaticians, as well for wet-lab  
41 biologists with minimum bioinformatics knowledge. Moreover, for the latter group, we  
42 describe the basic algorithm of actions necessary for MinION™ sequencing analysis from  
43 the first to last step.

44 **Issue Section:** [TECHNICAL NOTE](#)

45 *Keywords:* sequencing technologies, long reads sequencing, bioinformatics software,  
1  
2 46 MinION, Oxford Nanopore  
3

4  
5 47

## 7 48 **Background**

9  
10 49 Recent years have witnessed a DNA sequencing boom due to the constantly improving  
11  
12 50 technologies and, consequently, the accessibility of sequencing to a large spectrum of  
13  
14 51 customers including scientists and medical practitioners. Researchers in many fields,  
15  
16  
17 52 from metagenomics to plant physiology to medicine have been implementing sequencing  
18  
19 53 experiments into their research. Oxford Nanopore Technologies (ONT) essentially  
20  
21  
22 54 accelerated this process by introducing the MinION™ sequencer, a portable device with  
23  
24 55 minimum requirements for technical skills and bioinformatics knowledge. Thus, DNA  
25  
26  
27 56 sequencing experiments became feasible even in field studies, in small laboratories and  
28  
29 57 soon will be available for medical applications in clinics [1].  
30  
31

32  
33 58 The NCBI PubMed database includes 261 scientific articles containing “Oxford Nanopore”  
34  
35 59 phrase published between 2009 and 2018 (by September 1, 2018), the majority of which  
36  
37  
38 60 were published in the last three years (see Fig. S1 in Supplementary). This is pointing,  
39  
40 61 both, at the increased popularity of the ONT sequencers and at the considerable  
41  
42  
43 62 improvement of the technology and sequencing quality in the last three years. For  
44  
45 63 example, the R10 version of the MinION™ flow cell was recently announced and it  
46  
47  
48 64 promises to improve sequencing quality, including for homopolymer stretches. High  
49  
50 65 throughput and long reads allow diverse applications of MinION™: virology [2], [3], plant  
51  
52  
53 66 pathology and agriculture [4], [5], tuberculosis studies [6], metagenomics and diet [7],  
54  
55 67 veterinary research [8]; and as a portable platform: field biodiversity studies [9],  
56  
57  
58 68 detection of Ebola virus in patients on the spot [10], [11], sequencing in space [12]. Not to  
59  
60 69 forget fundamental applications for long read sequencing studies, such as de novo  
61  
62  
63  
64  
65



70 genome assembly, improvement of existing genome assemblies and discovery of  
71 structural variants and long repeats [13]–[16]. ONT sequencing is favorable for  
72 microbiology research as small-sized bacterial genomes can be covered in just one  
73 MinION™ read [17], [18], thus providing high resolution in genome architecture.

74 ONT supplies its users with the necessary software to perform base calling, i.e. converting  
75 of MinION™’s electrical signals into a sequence of nucleotides: the on-run MinKNOW and  
76 offline Albacore. Both applications utilize the complex, recurrent neural network (RNN)  
77 algorithm, which is recently very popular in computer science. It allows the software to  
78 learn from existing data and improve its performance. It is worth noting that the base  
79 calling process is the central to improving the accuracy of ONT sequencing technology  
80 and its algorithm is being constantly improved and updated. The output is a collection of  
81 FAST5 and/or FASTQ files containing the base-called sequences. These are the files that  
82 are used for any sequence analysis in bioinformatics, thus, the base-caller can be called a  
83 “gate” from MinION™ into data interpretation. Nevertheless, the range of ONT provided  
84 analysis tools is limited, and concerns only specific applications, excluding general  
85 processing, which is left to the user. For example, the EPI2ME software suite, based on  
86 Metrichor platform, includes applications for barcode analysis, metagenomics and  
87 antimicrobial resistance analyses and some technical tests [19]. Several research groups  
88 have been recently focusing on the development of MinION™ specific bioinformatics tools  
89 [20]–[22], although most of these require considerable bioinformatics knowledge. These  
90 conditions impede benefits that MinION™ based DNA sequencing could bring to medical  
91 practitioners and researchers with less IT experience. To fill this gap, we developed  
92 NanoPipe, a web-driven automatic pipeline that can quickly and effortlessly process data  
93 produced by MinION™, as well provide necessary files for further bioinformatics analysis  
94 if required.

## 95 **Methods**

1  
2 96 NanoPipe can be conceptually divided into four stages: 1) data uploading in FASTA or  
3  
4  
5 97 FASTQ formats, 2) alignment of MinION™ reads against the target sequences, 3)  
6  
7 98 alignment analysis, and 4) results display (see Fig. 1). It was developed with no-IT-  
8  
9  
10 99 experienced users in mind, hence it provides a web-driven interface with the usage page  
11  
12 100 describing the main features of the tool. The start-of-analysis page is simple and intuitive.  
13  
14  
15 101 A user must, first, choose a target genome from a NanoPipe's list (see further) or upload  
16  
17 102 their own target sequence. The next step is the essential part of the pipeline: mapping of  
18  
19  
20 103 sequencing reads to the target using version 946 of the LAST sequence aligner (LAST ,  
21  
22 104 RRID:SCR\_006119). LAST accounts for the MinION™ specific sequencing errors, thus it  
23  
24  
25 105 generates highly reliable results. It can determine the rates of insertion, deletion and each  
26  
27 106 kind of substitution in a type of data (e.g. MinION™ reads of AT-rich *Plasmodium* DNA)  
28  
29  
30 107 [23]. It then uses these rates to determine the most probable alignments. LAST also finds  
31  
32 108 the most probable division of each read into one or more parts together with the most  
33  
34  
35 109 probable alignment of each part with the last-split function [24], [25], i.e. if LAST finds a  
36  
37 110 better scoring alternative alignment of the read where it is being split into parts and  
38  
39  
40 111 mapped to different regions of the target, such alignment is submitted to the results. This  
41  
42 112 is a principled way to handle complex DNA rearrangements, gene fusions in RNA,  
43  
44  
45 113 chimeric host/viral sequences, etc. The tasks of detecting polymorphisms and  
46  
47 114 distinguishing viral serotypes can be performed more precisely for MinION™ data when  
48  
49  
50 115 based on a LAST alignment, because the tool estimates the probability that each base is  
51  
52 116 correctly aligned. The probability is low if there is an ambiguity, i.e. the base could align to  
53  
54  
55 117 more than one place. The default NanoPipe parameters for the LAST alignment are  
56  
57 118 efficient for most cases, but can be easily adjusted by the user. We use last-train to find  
58  
59  
60 119 the optimal alignment parameters for MinION™ sequencing [23]. For advanced users, it is

120 recommended, although not necessary, to acquaint with the settings of LAST and last-  
1  
2  
3  
4  
5  
6  
7  
8  
9  
10  
11  
12  
13  
14  
15  
16  
17  
18  
19  
20  
21  
22  
23  
24  
25  
26  
27  
28  
29  
30  
31  
32  
33  
34  
35  
36  
37  
38  
39  
40  
41  
42  
43  
44  
45  
46  
47  
48  
49  
50  
51  
52  
53  
54  
55  
56  
57  
58  
59  
60  
61  
62  
63  
64  
65

121 train [26].

122 After the alignment is completed, NanoPipe evaluates the nucleotide variation for each  
123 position, and based on this analysis generates consensus sequence and a list of possible  
124 single nucleotide polymorphisms (SNP). The minimum nucleotide count per position  
125 should be at least ten (i.e., at least ten reads), otherwise a gap will be assigned at the  
126 position in the consensus sequence. The consensus sequence is calculated based on the  
127 majority rule, i.e. the nucleotide with the higher count at a particular position is assigned  
128 to the consensus. If the counts for any two nucleotides differ from each other by not more  
129 than by 20%, both nucleotides are included in the consensus with the use of the IUPAC  
130 nomenclature [27]. Statistical evaluation of nucleotide variation is presented in a separate  
131 table, and suggests a polymorphism candidate if an alternate nucleotide has coverage of  
132 at least 20% of all reads.

133 Figure 1. A schematic representation of the NanoPipe workflow.

134  
135 To distinguish between artifacts and true polymorphisms, we have set three additional  
136 filters. First, SNP candidate should have read coverage of at least 30% from the maximum  
137 coverage in the respective contig, otherwise it is not listed in the polymorphisms table  
138 and not counted as a SNP. Second, the probability of SNP at the position is calculated. For  
139 that, the relative nucleotide frequency is multiplied by a custom weight factor:  
140 transversions are weighted by the factor of 1 and transitions – by the factor of 2. This is  
141 based on the assumption that transitions are two times more likely than transversions.  
142 This weighted probability for each SNP candidate is rescaled for convenience, so that the  
143 maximum value is 1. The probability is displayed for each nucleotide in the  
144 polymorphisms table, a SNP candidate is most likely to be the true SNP if its joint

145 probability is 1. Third, the analysis is refined by an assessment of the alignment quality  
146 around a potential SNP by estimating a p-error. The p-error is calculated based on the  
147 formula used in the LAST methods to calculate the probability of the alignment for a  
148 single nucleotide [28]. In NanoPipe the p-error is estimated over a region of maximum 10  
149 nucleotides before and after the SNP position (excluding the SNP itself) and for all the  
150 read alignments at the region (Fig. 2). It is based on the LAST reliability score assigned to  
151 each base pair of the alignment. In addition, polymorphism candidates for human and  
152 *Plasmodium* are linked to the public SNP databases.

$$p - error = \frac{\sum_1^i 10^{-\left(\frac{ASCII_{value}-33}{10}\right)}}{i}$$

154 Figure 2. Formula used in NanoPipe for the p-error calculations, where  $i$  is the total  
155 number of nucleotides around the SNP for all mapped reads, i.e.  $i = N(\text{nucleotides around}$   
156  $\text{SNP}) * N(\text{reads mapped to the evaluated region})$ . ASCII values are extracted from the LAST  
157 alignment and indicate the reliability of each base's alignment, see more information  
158 about LAST quality symbols at [28].

159 The results are supplemented with a number of useful pages, such as alignment of  
160 consensus sequences against target sequences, read length distribution and individual  
161 reads' alignment length distribution, and nucleotide plots showing distribution of  
162 nucleotides from all reads at each position of the consensus sequence. The latter is the  
163 interactive visual representation of the results and enables the user to monitor any  
164 nucleotide variations by eye. NanoPipe also provides the necessary files for browsing the  
165 alignment in the IGV genome browser [29], where each individual read alignment is  
166 displayed.

## 167 Findings

168 The experience of our working group in conducting MinION™ sequencing and analysis  
169 workshops [30] for medical doctors and wet-lab researchers revealed the general gaps in  
170 bioinformatics knowledge among these groups. While the experimental part of the  
171 workshop was easily performed by the participants, even if mastered for the first time,  
172 the processing of the sequenced data proved to be the most enduring and difficult part.  
173 Therefore, keeping in mind the weakest spots of non-bioinformatician researchers, we  
174 will describe here some features of NanoPipe usage in details.  
175 To start a new analysis, a query (sequencing reads) and a target (a genome or a region of  
176 interest) should be provided. The query (1D or 1D<sup>2</sup>) can be uploaded via the NanoPipe's  
177 web interface from the user's computer in one FASTA or FASTQ file, also in archived  
178 format. As the ONT-provided base callers output sequenced reads in multiple files, it is  
179 important to know how to merge them into one file, in an operating system of the user  
180 (Windows, Mac OS, Linux). As an alternative, NanoPipe can also handle multiple FASTA or  
181 FASTQ files when they are archived (zipped), for example, with "zip" command on Linux  
182 or WinZip tool on Windows. The maximum size of the query file should not exceed 3 GB.  
183 The target can be chosen from a drop-down menu or uploaded by the user in FASTA  
184 format. The list of NanoPipe precompiled targets includes reference genomes for human  
185 (hg38), RefSeq accession GCF\_000001405.38; *Escherichia coli*, RefSeq accession  
186 GCF\_000005845.2; *Caenorhabditis elegans*, RefSeq accession GCF\_000002985.6;  
187 *Drosophila melanogaster*, RefSeq accession GCF\_000001215.4; *Mus musculus*, RefSeq  
188 accession GCF\_000001635.26; *Arabidopsis thaliana*, RefSeq accession GCF\_000001735.4;  
189 *Plasmodium falciparum* strain 3D7, downloaded from plasmodb.org, version=2013-03-01;  
190 a representative genome for *Camponotus floridanus*, RefSeq accession GCF\_003227725.1;  
191 and Dengue virus genome variants for serotyping (NC\_001477.1, NC\_001474.2,  
192 NC\_001475.2 and NC\_002640.1 for variant 1, variant 2, variant 3 and variant 4,

193 respectively). Otherwise, DNA sequences of whole genomes, transcriptomes or genes for  
1  
2 194 different organisms can be accessed via particular species databases or in the  
3  
4  
5 195 corresponding databases at NCBI [31]. The NanoPipe prepared targets include the  
6  
7 196 precompiled, best fitting alignment parameters and substitution matrices (based on last-  
8  
9  
10 197 train calculations). The substitution matrix is an important part of any alignment and  
11  
12 198 contains information about the mismatch cost between any pair of nucleotides. Any  
13  
14  
15 199 uploaded targets will be used with the NanoPipe default parameters that are suitable for  
16  
17 200 most cases. To avoid “noise”, i.e. mapping of too short reads, the user can set the read  
18  
19  
20 201 length limit, for example to 200 nucleotides (depends on the experiment type and  
21  
22 202 purpose). A unique name can be assigned to a job and used later within one month to  
23  
24  
25 203 retrieve the results from the NanoPipe server. After one month the data will be deleted  
26  
27 204 from the server.

28  
29 205 Depending on the query and target size, a NanoPipe analysis can last from several  
30  
31  
32 206 minutes to several hours, the server’s memory used for the calculations is limited to 16  
33  
34  
35 207 GB. The user will receive the notification via email (if the email address was provided)  
36  
37 208 when his/her job is completed. The summary of the completed analysis depicts the LAST  
38  
39  
40 209 parameters that were used and the mapping statistics, i.e. how many reads were mapped  
41  
42 210 altogether and the reads distribution per chromosomes/scaffolds of the target. This table  
43  
44  
45 211 can be sorted in increasing/decreasing order. Mapping distribution statistics show how  
46  
47 212 long the reads in the query were, and allow estimating whether the sequencing resulted  
48  
49  
50 213 in the expected read lengths. Thus, for whole genome sequencing by MinION™ a  
51  
52 214 researcher can expect read lengths up to over a million nucleotides; targeted sequencing  
53  
54  
55 215 results in read lengths corresponding to the target length; transcriptome sequencing or  
56  
57 216 RNAseq experiments should provide reads with length typical to particular species’  
58  
59 217 transcript lengths (around one-to-two thousand nucleotides for most organisms).  
60  
61  
62  
63  
64  
65

1  
2  
3  
4  
5  
6 218 Alignment distribution statistics inform about the quality of the alignment, i.e. whether  
7  
8 219 the whole read or a part of it could be mapped to the target.  
9  
10  
11 220 Alignment results are visualized in NanoPipe in several ways: ordinal line by line pairwise  
12  
13 221 alignment, a BAM file and a graphical representation via nucleotide plots. BAM and  
14  
15 222 indexed BAM (BAI) files can be easily downloaded from the results page and further used  
16  
17 223 for an interactive genome browsers, for example, IGV. The target FASTA files are required  
18  
19 224 by IGV, as well, and can be downloaded together with BAM files. IGV is free software and  
20  
21 225 can be accessed from [32]. Nucleotide plots represent the colored mapping scheme at  
22  
23 226 each position of the sequence, each nucleotide marked with its specific color. This enables  
24  
25 227 easy monitoring for gaps and possible nucleotide substitutions. Navigating along the plot  
26  
27 228 is enabled via right and left shift, as well by entering a nucleotide's coordinate in the  
28  
29 229 search field. For long target regions, nucleotide plots provide a zoom-out preview at the  
30  
31 230 bottom of the page.  
32  
33  
34 231 Each chromosome/region of the target is supported with an individual consensus which  
35  
36 232 can be seen and downloaded in FASTA format. Positions that cannot be defined (not  
37  
38 233 enough information in the input data) are designated as "N", gaps are designated as "-"; if  
39  
40 234 a position is occupied by any of the four nucleotides it is designated as "X"; other  
41  
42 235 ambiguous positions are designated using IUPAC nomenclature.  
43  
44  
45  
46  
47  
48 236 The polymorphisms table lists SNP candidates and provides joint probabilities for each  
49  
50 237 candidate (maximum = 1), as well raw counts for each nucleotide at the target position. If  
51  
52 238 the data are available, the corresponding SNP IDs (identifiers) will be retrieved from the  
53  
54 239 existing databases (currently available only for human [33] and *Plasmodium* [34]). The  
55  
56 240 alignment quality around an SNP candidate is reported as p-error, the higher the p-error  
57  
58 241 (maximum 1), the lower the alignment quality. Low alignment quality might indicate a  
59  
60  
61  
62  
63  
64  
65

242 region of sequencing errors around an individual SNP and, thus, signify the lower  
1  
2 243 reliability of the candidate detection. However, a cluster of closely located SNPs within a  
3  
4  
5 244 distance of less than 10 nucleotides would have a similar effect. Therefore, the p-error is  
6  
7 245 an additional parameter that might be taken into consideration by the user. Detailed  
8  
9  
10 246 analysis of the nucleotide plot or the alignment in the IGV viewer around questionable  
11  
12 247 candidates may help in making a decision, including consideration of biological relevance.  
13  
14  
15  
16 248 To view the result pages for nucleotide plots, consensus, polymorphisms and alignment  
17  
18 249 the user needs to choose a particular chromosome/region. This approach accelerates the  
19  
20  
21 250 data display and prevents the web browser from overloading.  
22  
23

24 251

## 26 252 **Study cases**

### 29 253 ***Plasmodium* polymorphism detection**

31  
32 254 The targeted regions were first amplified using the standard PCR protocol [35]. The  
33  
34 255 resulting amplicons were sequenced with the MinION™ using the ONT sequencing kit  
35  
36  
37 256 SDK-MAP005 or SQK-MAP006 for the library preparation and the flow cell version FLO-  
38  
39 257 MAP003. The sequences were aligned against the *Plasmodium* genome (*P. falciparum*  
40  
41  
42 258 reference genome based on 3D7 strain). Exhaustive discussion of the ONT utility for  
43  
44 259 *Plasmodium* SNP calling and the library preparation methods are presented elsewhere  
45  
46  
47 260 [35]. NanoPipe succeeded in mapping 99.9% of all query reads and detecting the expected  
48  
49 261 mutations (see Fig. 3). The specific characteristic of the *Plasmodium* genome, multiple  
50  
51  
52 262 AT/T repeats, can be easily observed in the nucleotide plot. The full analysis of a 21 MB  
53  
54 263 (FASTA format) query against the *P. falciparum* genome with NanoPipe took less than  
55  
56  
57 264 four minutes. This example demonstrates that the analysis of just 10157 MinION™ reads  
58  
59 265 with a high AT content on NanoPipe results in reliable data. Detailed screen shots of the  
60  
61  
62  
63  
64  
65



266 NanoPipe results for this study case can be found in the Supplementary material (Figures  
1  
2 267 S2 – S10).

3  
4  
5 268  
6  
7 269 Figure 3. Sample case 1. A: The polymorphisms table displays the three SNP candidates:  
8  
9  
10 270 two of them (at positions 403625 and 404407) are expected mutations leading to K76T  
11  
12 271 and A220S amino acid changes and, as a consequence, to altered resistance of the parasite  
13  
14  
15 272 to chloroquine, mefloquine and quinine drugs [35]. B: Nucleotide plot. The purple arrow  
16  
17 273 points to the G>T substitution at the position 404407 (GCC>TCC codon change). The  
18  
19  
20 274 orange arrow highlights an AT-rich region, the typical feature of the *P. falciparum*  
21  
22 275 genome.

23  
24  
25 276  
26  
27 277 **Targeted sequencing of EGFR transcript from human lung adenocarcinoma cell line**  
28  
29  
30 278 **H1975**

31  
32 279 The region of the human EGFR cDNA corresponding to exons 17-22 was amplified using  
33  
34  
35 280 the primers CTAAGATCCCGTCCATCGCC (forward) and ACATATGGGTGGCTGAGGGA  
36  
37 281 (reverse). The library preparation was performed following the manufacturer's  
38  
39  
40 282 recommendation using the SQK-LSK108 kit from ONT and then sequencing was done with  
41  
42 283 the MinION™ using flow cell version FLO-MIN107 R9. The raw 1D reads (900 MB, FASTA  
43  
44  
45 284 format) were uploaded to NanoPipe using the human reference genome as a target; the  
46  
47 285 analysis took 135 minutes. 79.9% of all reads were mapped to the EGFR gene on  
48  
49  
50 286 chromosome 7. Most of the remaining reads (13.5%) were mapped to chromosome 11, to  
51  
52 287 regions corresponding to the cortactin gene (NM\_138565) that is overexpressed in  
53  
54  
55 288 different cancers [36], and the gene encoding subunit 2 of the splicing factor 3b protein  
56  
57 289 complex (NM\_006842). This gene might be differentially expressed in tumor tissues [37],  
58  
59  
60 290 nevertheless, there is no definite research about possible roles of this gene in cancers. It

291 may be the case that the gene is overexpressed in cell line H1975 and, therefore, its  
1  
2 292 transcript was sequenced as an abundant contaminant, similar to the cortactin transcript.  
3  
4  
5 293 The four mutations expected within this region in this cell line [38] were detected, see Fig.  
6  
7 294 4. This example demonstrates the suitability of NanoPipe for cancer sequencing analysis.  
8  
9  
10 295  
11  
12 296 Figure 4. A. Polymorphisms results. The two expected nucleotide substitutions are silent:  
13  
14 297 G>A (CAG>CAA = Gln) at position 55181370 and T>C (ACT>ACC = Thr) at position  
15  
16 298 55198724; two other substitutions at position 55181378 (C>T leading to the amino acid  
17  
18 299 change T745M) and at position 55191822 (T>G leading to the amino acid change L813R)  
19  
20  
21  
22 300 are responsible for the sensitivity to anticancer drugs, in particular to gefitinib and  
23  
24 301 erlotinib [38]. B. Nucleotide plot. The zoom-out scheme at the bottom depicts seven  
25  
26 302 alignment picks, they represent seven sequenced exons of the transcript. The nucleotide  
27  
28 303 plot is showing the first of these picks, pointed to by the orange arrows.  
29  
30  
31

32 304  
33  
34 305 **RNAseq analysis of the ant species *Camponotus maculatus***  
35  
36  
37 306 Monarch Total RNA Miniprep kit (NEB) was used for the poly-A RNA extraction according  
38  
39 307 to the manufacturer's recommendations. The library was prepared using the SQK-PCS108  
40  
41  
42 308 kit from ONT and then sequenced with MinION™ using FLO-MIN107 R9 flow cell version  
43  
44 309 following the manufacturer's recommendations. The raw 1D reads in FASTA format were  
45  
46 310 uploaded to NanoPipe, the reference genome of *Camponotus floridanus* was used as the  
47  
48 311 target genome, as neither genome nor transcriptome of *C. maculatus* are available yet. The  
49  
50  
51  
52 312 analysis of the 1.5 GB query ran for 3 hours. Out of 1814750 raw reads 1773747 (97.7 %)  
53  
54 313 were mapped to the target, spanning 431 scaffolds out of 657, including 150 scaffolds  
55  
56 314 with coverage of more than 1000 reads per scaffold. This result is consistent with the  
57  
58  
59  
60  
61  
62  
63  
64  
65

1  
2 315 number of reads sequenced, and the fact that the target was the genome of a different  
3 316 species, thus, NanoPipe can be used for studying newly sequenced species.

4  
5 317  
6  
7 318 **Direct RNAseq of poxvirus isolated from the host cells of green monkey**

8  
9  
10 319 We examined the recent MinION™ direct RNA sequencing data of the *Vaccinia virus WR*  
11  
12 320 mRNA isolated from the kidney fibroblast cells of *Chlorocebus sabeus* (for details see  
13  
14 [39]). Using the virus genome and the monkey genome as targets in the two separate  
15 321  
16  
17 322 runs, we could separate the reads coming from the two organisms. From the tested 29846  
18  
19 reads, 1314 were mapped to the virus genome (GenBank accession LT966077.1) and  
20 323  
21  
22 324 14714 reads were mapped to the *C. sabeus* genome (GenBank accession  
23  
24 GCA\_000409795.2), which is consistent with the published results. The option of the  
25 325  
26  
27 326 direct target upload was also tested on the small and big size input files (the virus genome  
28  
29 size is 198 KB and the green monkey genome is of 2.82 GB). The both runs were finished  
30 327  
31  
32 328 successfully in 12 seconds and in 51 minutes, respectively, including the construction of  
33  
34 the target databases. NanoPipe proved to be useful in analyzing the mixed long reads of  
35 329  
36  
37 330 virus and its host.

38  
39 331  
40  
41  
42 332 **Discussion**

43  
44 333 We have developed NanoPipe, a web-driven application that enables easy analysis of  
45  
46 MinION™ sequencing data and is suitable for, both, experienced bioinformaticians and  
47 334  
48  
49 335 biologists with limited IT knowledge. NanoPipe provides users with the consensus  
50  
51 sequence of the studied DNA and a list of putative single nucleotide polymorphisms. In  
52 336  
53  
54 337 this work, we used four different experimental datasets: targeted sequencing of the AT-  
55  
56 rich genome of *P. falciparum*, targeted sequencing of EGFR human cDNA, direct RNA  
57 338  
58  
59 339 sequencing of *V. virus* and its host, green monkey *C. sabeus*; and RNAseq of the ant *P.*

340 *maculatus* that has so far no fully sequenced genome nor transcriptome. These four test  
1  
2 341 cases represent different tasks that biologists from different fields of study could be  
3  
4  
5 342 interested in: sequencing and SNP detection in a repeat-rich genomes with low  
6  
7 343 sequencing yield (study case with *P. falciparum*); mutation detection in human cancer  
8  
9  
10 344 samples (study case with lung adenocarcinoma cell line H1975); RNAseq of a newly  
11  
12 345 sequenced organism (study case with *C. maculatus*) and of a mixed species sample (virus-  
13  
14  
15 346 host study). NanoPipe proved to be a reliable tool for all these tasks: It detected all  
16  
17 347 expected mutations for *Plasmodium* and the EGFR transcript region and succeeded in  
18  
19  
20 348 mapping more than 90% RNAseq reads from *C. maculatus* to the reference genome. In the  
21  
22 349 case with the virus-host direct RNA sequencing NanoPipe successfully segregated the  
23  
24  
25 350 mixed reads between the virus genome and its host genome. We have tested NanoPipe  
26  
27 351 during two workshops at the International Summer School for MinION™ sequencing in  
28  
29  
30 352 Bangkok (2017) and Manado (2018) with participants having no bioinformatics  
31  
32 353 experience from the medical and biological research fields. NanoPipe proved to be  
33  
34  
35 354 efficient and understandable for these users. Nevertheless, our team also noted during  
36  
37 355 these practical studies that the participants lacked some basic knowledge, necessary for  
38  
39  
40 356 conducting successful sequencing experiments. Therefore, we described here in detail the  
41  
42 357 general scheme of working with long read sequencing data. The flexibility of NanoPipe  
43  
44  
45 358 allows researchers to study any sequence of interest (including cancer samples in human  
46  
47 359 patients), as the list of targets is not limited. With this software, we hope to make  
48  
49  
50 360 MinION™ sequencing even more accessible for medical researchers and biologists  
51  
52 361 without sophisticated IT resources and expertise. The next step for the NanoPipe project  
53  
54  
55 362 will include more sophisticated statistics for SNP detection and evaluation. Also, we are  
56  
57 363 planning to cover the microbiology field and implement an option for metagenomics  
58  
59 364 analysis.  
60  
61  
62  
63  
64  
65

365

1

## 2 366 **Availability of data and source code**

3

4  
5 367 Project name: NanoPipe

6

7 368 Project home page: <http://bioinformatics.uni-muenster.de/tools/nanopipe>, github page:

8

9  
10 369 <https://github.com/IOB-Muenster/nanopipe2>. The NanoPipe package for local

11

12 370 installation is available at the NanoPipe github page. The explanation on installation and

13

14 371 check-install procedures can be found in the github directory.

15

16  
17 372 Operating system: Unix

18

19 373 Programming language: Javascript, Python, Perl

20

21 374 License: Apache License 2.0

22

23  
24 375 Other: there are no limitations for web browser type. The local version can be installed on

25

26  
27 376 Unix operating system

28

29 377 RRID: SCR\_016852

30

31  
32 378 The raw sequence data for the test runs and test jobs can be accessed from the homepage

33

34 379 [http://bioinformatics.uni-muenster.de/share/NanoPipe\\_test\\_data/](http://bioinformatics.uni-muenster.de/share/NanoPipe_test_data/)

35

### 36 37 380 Test data description:

38

39 381 1. Data set *P. falciparum* sequencing

40

41  
42 382 1.1 MinION™ targeted sequencing for *Plasmodium falciparum* sequencing.

43

44 383 1.2 PfCRT and K-propeller genes were sequenced using long-read technologies within

45

46  
47 384 the experiments of testing MinION™ sequencer for SNP detection in *Plasmodium*.

48

49 385 1.3 The sequencing was performed for the MinION™ sequencing workshop, 2017 in

50

51  
52 386 Bangkok, Thailand at the Mahidol University.

53

54 387 1.4 Raw reads in a single FASTA file, archived using zgzip command.

55

56  
57 388 1.5 *P. falciparum* culture, strain 3D7.

58

59 389 1.6 Size: 21 MB, archived: 4.3 MB.

60

61

62

63

64

65

390

1

2 391 2. Data set for EGFR sequencing

3

4 392 2.1 MinION targeted sequencing of the CDS for EGFR human gene, spanning exons 17-

5

6 393 22.

7

8 394 2.2 These data were generated to test MinION capacity for detecting SNP in human

9

10 395 cancer DNA

11

12 396 2.3 The sequencing was performed for the MinION™ sequencing workshop, 2017 in

13

14 397 Bangkok, Thailand at the Mahidol University.

15

16 398 2.4 Raw reads in a single FASTA file, archived using zgzip command.

17

18 399 2.5 Human lung adenocarcinoma cell line H1975 (RRID:CVCL\_1511)

19

20 400 2.6 Size: 900 MB, archived: 259 MB.

21

22 401

23

24 402 3. Data set for *Camponotus maculatus* sequencing

25

26 403 3.1 MinION RNAseq for ant *C. maculatus*

27

28 404 3.2 Poly-A RNA sequencing was performed for the given ant species at first time

29

30 405 3.3 The sequencing was performed in the Institute of Bioinformatics, Muenster,

31

32 406 Germany; the library was prepared in the group of Juergen Gadau, University of Muenster.

33

34 407 3.4 Raw reads in a single FASTA file, archived using zgzip command.

35

36 408 3.5 Larvae and adult individuals from the lab culture

37

38 409 3.6 Size: 1.5 GB, archived: 309 MB.

39

40 410

41

42 411 Supporting data and snapshots of the GitHub are also archived in the *GigaScience* GigaDB

43

44 412 repository[40].

45

46 413

47

48 414 **Supplementary materials.**

49

50

51

52

53

54

55

1  
2 415 Figure S1: Number of scientific publications that contain the phrase “Oxford Nanopore” in  
3 their abstracts.

4  
5 416 Figures S2-S10: The results pages for the *P. falciparum* test case.  
6

7 417  
8 418

9  
10 419 **Declarations**

11  
12 420 **List of abbreviations**

13  
14 421 CDS: coding sequence; GB: GigaByte; ID: Identifier; IT: Information Technology; MB: Mega  
15 Byte; ONT: Oxford Nanopore Technologies; SNP: Single Nucleotide Polymorphism  
16  
17 422

18  
19 423  
20  
21  
22 424 **Ethics approval and consent to participate**

23  
24 425 Not applicable  
25  
26 426

27  
28 427 **Consent for publication**

29  
30 428 Not applicable  
31  
32 429

33  
34 430 **Competing interests**

35  
36 431 The authors declare that they have no competing interests  
37  
38 432

39  
40 433 **Funding**

41  
42 434 The work has been funded by Institute of Bioinformatics, University of Muenster and  
43  
44 435 University Clinic Muenster (UKM)  
45  
46 436

47  
48 437 **Authors’ contribution**

49  
50 438 VS validated the software, participated in the concept design and composed the  
51  
52 439 manuscript draft; TK designed the software and participated in the code writing; FM  
53  
54  
55  
56  
57  
58  
59  
60  
61  
62  
63  
64  
65

440 wrote the code for polymorphism analysis and contributed to the manuscript writing; NG  
1  
2 441 wrote the major part of the pipeline code and designed the software; MF participated in  
3  
4 442 the improvement of the software, including LAST optimization, and contributed to the  
5  
6  
7 443 manuscript writing; YS contributed to the analysis and provided the access to the  
8  
9  
10 444 MinION™ sequencing summer school; WM designed the concept and supervised the  
11  
12 445 work. All the authors read and approved the manuscript.  
13  
14

15 446

16

### 17 447 **Acknowledgements**

18

19 448 The targeted sequencing of *Plasmodium falciparum* (strain 3D7) genes PfCRT\_1, PfCRT\_2,  
20  
21  
22 449 K13-propeller and EGFR human transcript was done for the MinION™ sequencing  
23  
24  
25 450 workshop in Bangkok, Thailand 2017 at the Mahidol University. The RNAseq library for *P.*  
26  
27 451 *maculatus* was prepared by the group of Jürgen Gadau, Molecular Evolution and  
28  
29  
30 452 Sociobiology group, University of Münster.  
31

31

32 453

33

### 34 454 **References**

35

36  
37 455 [1] ONT, “Flongle.”. <https://nanoporetech.com/products/flongle>. [Accessed: 05-Sep-  
38  
39 456 2018].  
40

41

42 457 [2] T. A. Sasani, K. R. Cone, A. R. Quinlan, and N. C. Elde, “Long read sequencing reveals  
43  
44 458 poxvirus evolution through rapid homogenization of gene arrays,” *bioRxiv*, p.  
45  
46  
47 459 245373, Jan. 2018.  
48

48

49 460 [3] T. Karamitros, I. Harrison, R. Piorkowska, A. Katzourakis, G. Magiorkinis, and J. L.

50

51 461 Mbisa, “De Novo Assembly of Human Herpes Virus Type 1 (HHV-1) Genome,

52

53 462 Mining of Non-Canonical Structures and Detection of Novel Drug-Resistance

54

55 463 Mutations Using Short- and Long-Read Next Generation Sequencing

56

57 464 Technologies,” *PLoS One*, vol. 11, no. 6, p. e0157600, Jun. 2016.  
58  
59  
60  
61  
62  
63  
64  
65



- 465 [4] A. Bronzato Badial, D. Sherman, A. Stone, A. Gopakumar, V. Wilson, W. Schneider,  
1  
2 466 and J. King, "Nanopore Sequencing as a Surveillance Tool for Plant Pathogens in  
3  
4  
5 467 Plant and Insect Tissues," *Plant Dis.*, vol. 102, no. 8, pp. 1648–1652, Aug. 2018.  
6
- 7 468 [5] M. B. Fleming, E. L. Patterson, P. A. Reeves, C. M. Richards, T. A. Gaines, and C.  
8  
9  
10 469 Walters, "Exploring the fate of mRNA in aging seeds: protection, destruction, or  
11  
12 470 slow decay?," *J. Exp. Bot.*, vol. 69, no. 18, pp. 4309–4321, Aug. 2018.  
13
- 14  
15 471 [6] A. Bainomugisa, T. Duarte, E. Lavu, S. Pandey, C. Coulter, B. J. Marais, and L. M.  
16  
17 472 Coin, "A complete high-quality MinION nanopore assembly of an extensively drug-  
18  
19  
20 473 resistant *Mycobacterium tuberculosis* Beijing lineage strain identifies novel  
21  
22 474 variation in repetitive PE/PPE gene regions," *Microb. Genomics*, Jun. 2018.  
23
- 24  
25 475 [7] W. Pearman, A. N. H. Smith, G. Breckell, J. Dale, N. E. Freed, and O. K. Silander, "New  
26  
27 476 tools for diet analyses: nanopore sequencing of metagenomic DNA from stomach  
28  
29  
30 477 contents to quantify diet in an invasive population of rats," *bioRxiv*, p. 363622, Jul.  
31  
32 478 2018.  
33
- 34  
35 479 [8] S. Theuns, B. Vanmechelen, Q. Bernaert, W. Deboutte, M. Vandenhole, L. Beller, J.  
36  
37 480 Matthijssens, P. Maes, and H. J. Nauwynck, "Nanopore sequencing as a  
38  
39  
40 481 revolutionary diagnostic tool for porcine viral enteric disease complexes identifies  
41  
42 482 porcine kobuvirus as an important enteric virus," *Sci. Rep.*, vol. 8, no. 1, p. 9830,  
43  
44 483 Dec. 2018.  
45
- 46  
47 484 [9] H. Krehenwinkel, A. Pomerantz, J. B. Henderson, S. R. Kennedy, J. Y. Lim, V. Swamy,  
48  
49  
50 485 J. D. Shoobridge, N. H. Patel, R. G. Gillespie, and S. Prost, "Nanopore sequencing of  
51  
52 486 long ribosomal DNA amplicons enables portable and simple biodiversity  
53  
54 487 assessments with high phylogenetic resolution across broad taxonomic scale,"  
55  
56  
57 488 *GigaScience*. 2019. In press.  
58
- 59 489 [10] J. Quick, N. J. Loman, S. Duraffour, J. T. Simpson, E. Severi, L. Cowley, J. A. Bore, R.  
60  
61  
62  
63  
64  
65

490 Koundouno, G. Dudas, A. Mikhail, N. Ouédraogo, B. Afrough, A. Bah, J. H. J. Baum, B.  
1  
2 491 Becker-Ziaja, J. P. Boettcher, M. Cabeza-Cabrerizo, Á. Camino-Sánchez, L. L. Carter,  
3  
4  
5 492 J. Doerrbecker, T. Enkirch, I. G.- Dorival, N. Hetzelt, J. Hinzmann, T. Holm, L. E.  
6  
7 493 Kafetzopoulou, M. Koropogui, A. Kosgey, E. Kuisma, C. H. Logue, A. Mazzarelli, S.  
8  
9  
10 494 Meisel, M. Mertens, J. Michel, D. Ngabo, K. Nitzsche, E. Pallasch, L. V. Patrono, J.  
11  
12 495 Portmann, J. G. Repits, N. Y. Rickett, A. Sachse, K. Singethan, I. Vitoriano, R. L.  
13  
14  
15 496 Yemanaberhan, E. G. Zekeng, T. Racine, A. Bello, A. A. Sall, O. Faye, O. Faye, N.  
16  
17 497 Magassouba, C. V. Williams, V. Amburgey, L. Winona, E. Davis, J. Gerlach, F.  
18  
19  
20 498 Washington, V. Monteil, M. Jourdain, M. Bererd, A. Camara, H. Somlare, A. Camara,  
21  
22 499 M. Gerard, G. Bado, B. Baillet, D. Delaune, K. Y. Nebie, A. Diarra, Y. Savane, R. B.  
23  
24  
25 500 Pallawo, G. J. Gutierrez, N. Milhano, I. Roger, C. J. Williams, F. Yattara, K.  
26  
27 501 Lewandowski, J. Taylor, P. Rachwal, D. J. Turner, G. Pollakis, J. A. Hiscox, D. A.  
28  
29  
30 502 Matthews, M. K. O. Shea, A. M. Johnston, D. Wilson, E. Hutley, E. Smit, A. Di Caro, R.  
31  
32 503 Wölfel, K. Stoecker, E. Fleischmann, M. Gabriel, S. A. Weller, L. Koivogui, B. Diallo,  
33  
34  
35 504 S. Keïta, A. Rambaut, P. Formenty, S. Günther, and M. W. Carroll, “Real-time,  
36  
37 505 portable genome sequencing for Ebola surveillance,” *Nature*, vol. 530, no. 7589,  
38  
39 506 pp. 228–232, Feb. 2016.

[11] 507 P. Mbala Kingebeni, C.-J. Villabona-Arenas, N. Vidal, J. Likofata, J. Nsio-Mbeta, S.  
43  
44 508 Makiala-Mandanda, D. Mukadi, P. Mukadi, C. Kumakamba, B. Djokolo, A. Ayoubu, E.  
45  
46  
47 509 Delaporte, M. Peeters, J.-J. Muyembe Tamfum, and S. Ahuka Mundeke, “Rapid  
48  
49 510 confirmation of the Zaire Ebola Virus in the outbreak of the Equateur province in  
50  
51  
52 511 the Democratic Republic of Congo: implications for public health interventions,”  
53  
54 512 *Clin. Infect. Dis.*, Jun. 2018.

[12] 513 S. L. Castro-Wallace, C. Y. Chiu, K. K. John, S. E. Stahl, K. H. Rubins, A. B. R. McIntyre,  
58  
59 514 J. P. Dworkin, M. L. Lupisella, D. J. Smith, D. J. Botkin, T. A. Stephenson, S. Juul, D. J.

- 515 Turner, F. Izquierdo, S. Federman, D. Stryke, S. Somasekar, N. Alexander, G. Yu, C.  
1  
2 516 E. Mason, and A. S. Burton, "Nanopore DNA Sequencing and Genome Assembly on  
3  
4  
5 517 the International Space Station," *Sci. Rep.*, vol. 7, no. 1, p. 18022, Dec. 2017.  
6  
7 518 [13] E. A. Solares, M. Chakraborty, D. E. Miller, S. Kalsow, K. Hall, A. G. Perera, J. J.  
8  
9  
10 519 Emerson, and R. S. Hawley, "Rapid Low-Cost Assembly of the *Drosophila*  
11  
12 520 *melanogaster* Reference Genome Using Low-Coverage, Long-Read Sequencing,"  
13  
14  
15 521 *G3 (Bethesda)*, p. g3.200162.2018, Jul. 2018.  
16  
17 522 [14] S. Deschamps, Y. Zhang, V. Llaca, L. Ye, G. May, and H. Lin, "A chromosome-scale  
18  
19  
20 523 assembly of the sorghum genome using nanopore sequencing and optical  
21  
22 524 mapping," *Nat Commun.* 2018 Nov 19;9(1):4844. doi: 10.1038/s41467-018-  
23  
24  
25 525 07271-1.  
26  
27 526 [15] B. Pradhan, T. Cajuso, R. Katainen, P. Sulo, T. Tanskanen, O. Kilpivaara, E. Pitkänen,  
28  
29  
30 527 L. A. Aaltonen, L. Kauppi, and K. Palin, "Detection of subclonal L1 transductions in  
31  
32 528 colorectal cancer by long-distance inverse-PCR and Nanopore sequencing," *Sci.*  
33  
34  
35 529 *Rep.*, vol. 7, no. 1, p. 14521, Dec. 2017.  
36  
37 530 [16] L. F. K. Kuderna, E. Lizano, E. Julia, J. Gomez-Garrido, A. Serres-Armero, M.  
38  
39  
40 531 Kuhlwilm, R. A. Alandes, M. Alvarez-Estape, T. Alioto, M. Gut, I. Gut, M. H. Schierup,  
41  
42 532 O. Fornas, and T. Marques-Bonet, "Selective single molecule sequencing and  
43  
44 533 assembly of a human Y chromosome of African origin," *bioRxiv*, p. 342667, Jun.  
45  
46  
47 534 2018.  
48  
49 535 [17] K. Chacon-Vargas, A. A. Chirino, M. M. Davis, S. A. Debler, W. R. Haimer, J. J. Wilbur,  
50  
51  
52 536 X. Mo, B. W. Worthing, E. G. Wainblat, S. Zhao, and J. G. Gibbons, "Genome  
53  
54 537 Sequence of *Zymomonas mobilis* subsp. *mobilis* NRRL B-1960," *Genome Announc.*,  
55  
56  
57 538 vol. 5, no. 30, Jul. 2017.  
58  
59 539 [18] A. C. Reis, K. Kroll, M. Gomila, B. A. Kolvenbach, P. F. X. Corvini, and O. C. Nunes,  
60  
61  
62  
63  
64  
65

540 "Complete Genome Sequence of *Achromobacter denitrificans* PR1," *Genome*  
1  
2 541 *Announc.*, vol. 5, no. 31, Aug. 2017.

3  
4  
5 542 [19] Metrichor, "METRICHOR LTD." <https://metrichor.com/>. [Accessed: 05-Sep-2018].

6  
7 543 [20] N. J. Loman, J. Quick, and J. T. Simpson, "A complete bacterial genome assembled  
8  
9  
10 544 de novo using only nanopore sequencing data," *Nat. Methods*, vol. 12, no. 8, pp.  
11  
12 545 733–735, Aug. 2015.

13  
14  
15 546 [21] A. Srivathsan, B. Baloglu, W. Wang, W. X. Tan, D. Bertrand, A. H. Q. Ng, E. J. H. Boey,  
16  
17 547 J. J. Y. Koh, N. Nagarajan, and R. Meier, "A MinION-based pipeline for fast and cost-  
18  
19  
20 548 effective DNA barcoding," *Mol Ecol Resour.* 2018 Apr 19. doi: 10.1111/1755-  
21  
22 549 0998.12890.

23  
24  
25 550 [22] R. M. Leggett, D. Heavens, M. Caccamo, M. D. Clark, and R. P. Davey, "NanoOK:  
26  
27 551 multi-reference alignment analysis of nanopore sequencing data, quality and  
28  
29  
30 552 error profiles," *Bioinformatics*, vol. 32, no. 1, p. btv540, Sep. 2015.

31  
32 553 [23] M. Hamada, Y. Ono, K. Asai, M. C. Frith, and J. Hancock, "Training alignment  
33  
34  
35 554 parameters for arbitrary sequencers with LAST-TRAIN," *Bioinformatics*, vol. 33,  
36  
37 555 no. 6, p. btw742, Dec. 2016.

38  
39  
40 556 [24] M. C. Frith and R. Kawaguchi, "Split-alignment of genomes finds orthologies more  
41  
42 557 accurately," *Genome Biol.*, vol. 16, no. 1, p. 106, Dec. 2015.

43  
44  
45 558 [25] M. C. Frith and S. Khan, "A survey of localized sequence rearrangements in human  
46  
47 559 DNA," *Nucleic Acids Res.*, vol. 46, no. 4, pp. 1661–1673, Feb. 2018.

48  
49  
50 560 [26] Frith M., "LAST: genome-scale sequence comparison." <http://last.cbrc.jp/>.  
51  
52 561 [Accessed: 05-Sep-2018].

53  
54  
55 562 [27] IUPAC, "IUPAC Codes." <https://www.bioinformatics.org/sms/iupac.html>.  
56  
57 563 [Accessed: 05-Sep-2018].

58  
59  
60 564 [28] Frith M., "last-split." <http://last.cbrc.jp/doc/last-split.html>. [Accessed: 05-Sep-  
61  
62  
63  
64  
65

- 565 2018].
- 1  
2 566 [29] H. Thorvaldsdottir, J. T. Robinson, and J. P. Mesirov, "Integrative Genomics Viewer  
3  
4  
5 567 (IGV): high-performance genomics data visualization and exploration," *Brief.*  
6  
7 568 *Bioinform.*, vol. 14, no. 2, pp. 178–192, Mar. 2013.
- 8  
9  
10 569 [30] Y. Suzuki, "JSPS, Training Seminar for MinION." <http://www.cb.k.u->  
11  
12 570 [tokyo.ac.jp/suzukilab/minion/summary.html](http://tokyo.ac.jp/suzukilab/minion/summary.html). [Accessed: 09-Oct-2018].
- 13  
14  
15 571 [31] NCBI, "National Center for Biotechnology Information."  
16  
17 572 <https://www.ncbi.nlm.nih.gov/>. [Accessed: 05-Sep-2018].
- 18  
19  
20 573 [32] IGV-page, "Home | Integrative Genomics Viewer."  
21  
22 574 <http://software.broadinstitute.org/software/igv/>. [Accessed: 05-Sep-2018].
- 23  
24  
25 575 [33] NCBI.dbSNP, "dbSNP." <https://www.ncbi.nlm.nih.gov/projects/SNP/>. [Accessed:  
26  
27 576 10-Oct-2018].
- 28  
29  
30 577 [34] PlasmoDB, "PlasmoDB : The Plasmodium Genomics Resource."  
31  
32 578 <http://plasmodb.org/plasmo/>. [Accessed: 10-Oct-2018].
- 33  
34  
35 579 [35] L. R. Runtuwene, J. S. B. Tuda, A. E. Mongan, W. Makalowski, M. C. Frith, M.  
36  
37 580 Imwong, S. Srisutham, L. A. Nguyen Thi, N. N. Tuan, Y. Eshita, R. Maeda, J.  
38  
39 581 Yamagishi, and Y. Suzuki, "Nanopore sequencing of drug-resistance-associated  
40  
41  
42 582 genes in malaria parasites, *Plasmodium falciparum*," *Sci. Rep.*, vol. 8, no. 1, p. 8286,  
43  
44 583 Dec. 2018.
- 45  
46  
47 584 [36] C. Gattazzo, V. Martini, F. Frezzato, V. Trimarco, E. Tibaldi, M. Castelli, M. Facco, F.  
48  
49 585 Zonta, A. M. Brunati, R. Zambello, G. Semenzato, and L. Trentin, "Cortactin, another  
50  
51  
52 586 player in the Lyn signaling pathway, is over-expressed and alternatively spliced in  
53  
54 587 leukemic cells from patients with B-cell chronic lymphocytic leukemia,"  
55  
56  
57 588 *Haematologica*, vol. 99, no. 6, pp. 1069–77, Jun. 2014.
- 58  
59 589 [37] T. A. Lantto, I. Laakso, H. J. D. Dorman, T. Mauriala, R. Hiltunen, S. Kõks, and A.  
60  
61  
62  
63  
64  
65

590 Raasmaja, "Cellular Stress and p53-Associated Apoptosis by Juniperus communis  
1  
2 591 L. Berry Extract Treatment in the Human SH-SY5Y Neuroblastoma Cells," *Int. J.*  
3  
4  
5 592 *Mol. Sci.*, vol. 17, no. 7, Jul. 2016.  
6  
7 593 [38] A. Suzuki, M. Suzuki, J. Mizushima-Sugano, M. C. Frith, W. Makalowski, T. Kohno, S.  
8  
9  
10 594 Sugano, K. Tsuchihara, and Y. Suzuki, "Sequencing and phasing cancer mutations  
11  
12 595 in lung cancers using a long-read portable sequencer," *DNA Res.*, vol. 24, no. 6, pp.  
13  
14  
15 596 585–596, Dec. 2017.  
16  
17 597 [39] D. Tombácz, I. Prazsák, A. Szúcs, B. Dénes, M. Snyder, and Z. Boldogkői, "Dynamic  
18  
19  
20 598 Transcriptome Profiling Dataset of Vaccinia Virus Obtained from Long-read  
21  
22 599 Sequencing Techniques," *Gigascience*, Nov. 2018. doi: [10.1093/gigascience/giy139](https://doi.org/10.1093/gigascience/giy139)  
23  
24  
25 600 [40] Shabardina V; Kischka T; Manske F; Grundmann N; Frith MC; Suzuki Y;  
26  
27 601 Makalowski W (2019): Supporting data for "NanoPipe - a web server for nanopore  
28  
29 602 MinION sequencing data analysis" GigaScience Database.  
30  
31  
32 603 <http://dx.doi.org/10.5524/100551>  
33

34 604  
35  
36  
37  
38  
39  
40  
41  
42  
43  
44  
45  
46  
47  
48  
49  
50  
51  
52  
53  
54  
55  
56  
57  
58  
59  
60  
61  
62  
63  
64  
65

Figure1

[Click here to access/download:Figure;Picture1.pdf](#)

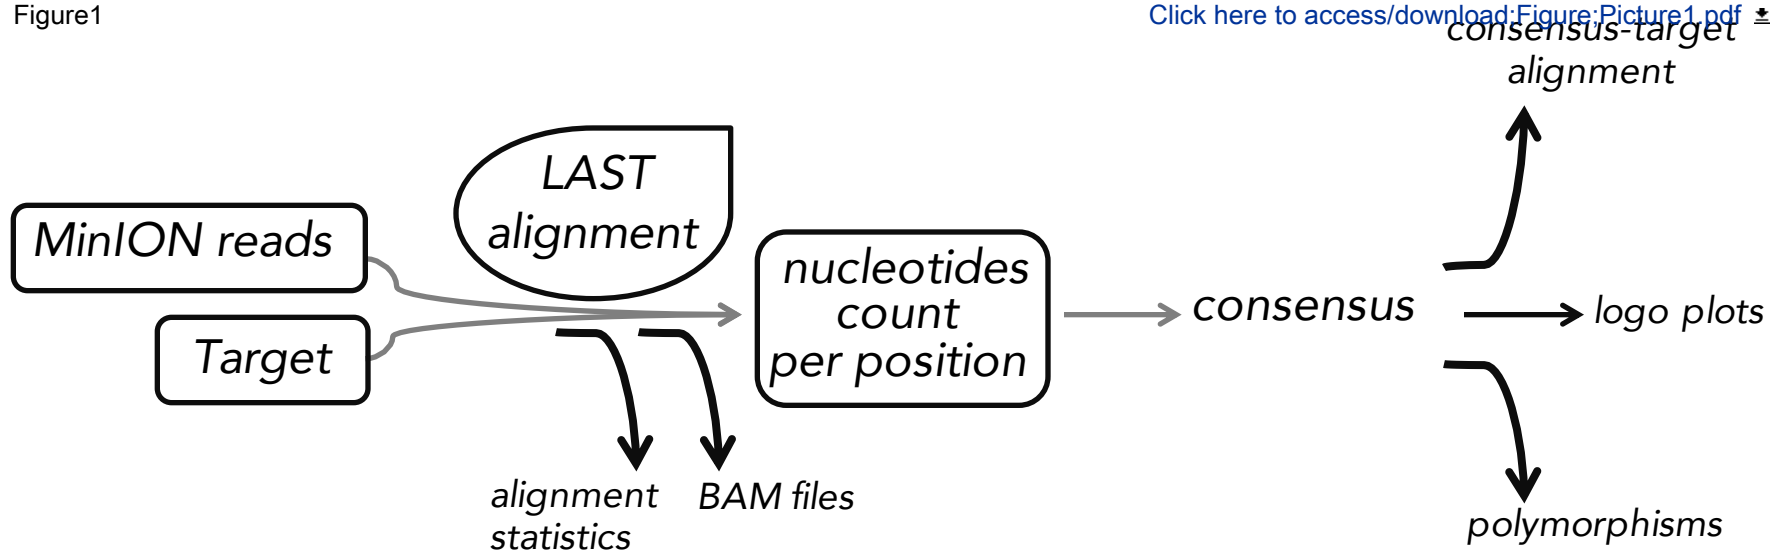

| Position | A   | C   | G | T   | Target | Matches in PlasmoDB                            | P-error (local alignment quality) | raw A | raw C | raw G | raw T |
|----------|-----|-----|---|-----|--------|------------------------------------------------|-----------------------------------|-------|-------|-------|-------|
| 403612   | 1.0 | -   | - | -   | t      | NGS_SNP.Pf3D7_07_v3.403612:<br>T:0.98 + A:0.02 | 0.0061                            | 4363  | 13    | 76    | 440   |
| 403625   | -   | 1.0 | - | -   | a      | NGS_SNP.Pf3D7_07_v3.403625:<br>C:0.65 + A:0.35 | 0.0068                            | 419   | 4817  | 31    | 18    |
| 404407   | -   | -   | - | 1.0 | g      | NGS_SNP.Pf3D7_07_v3.404407:<br>T:0.72 + G:0.28 | 0.0036                            | 16    | 37    | 200   | 4650  |

B

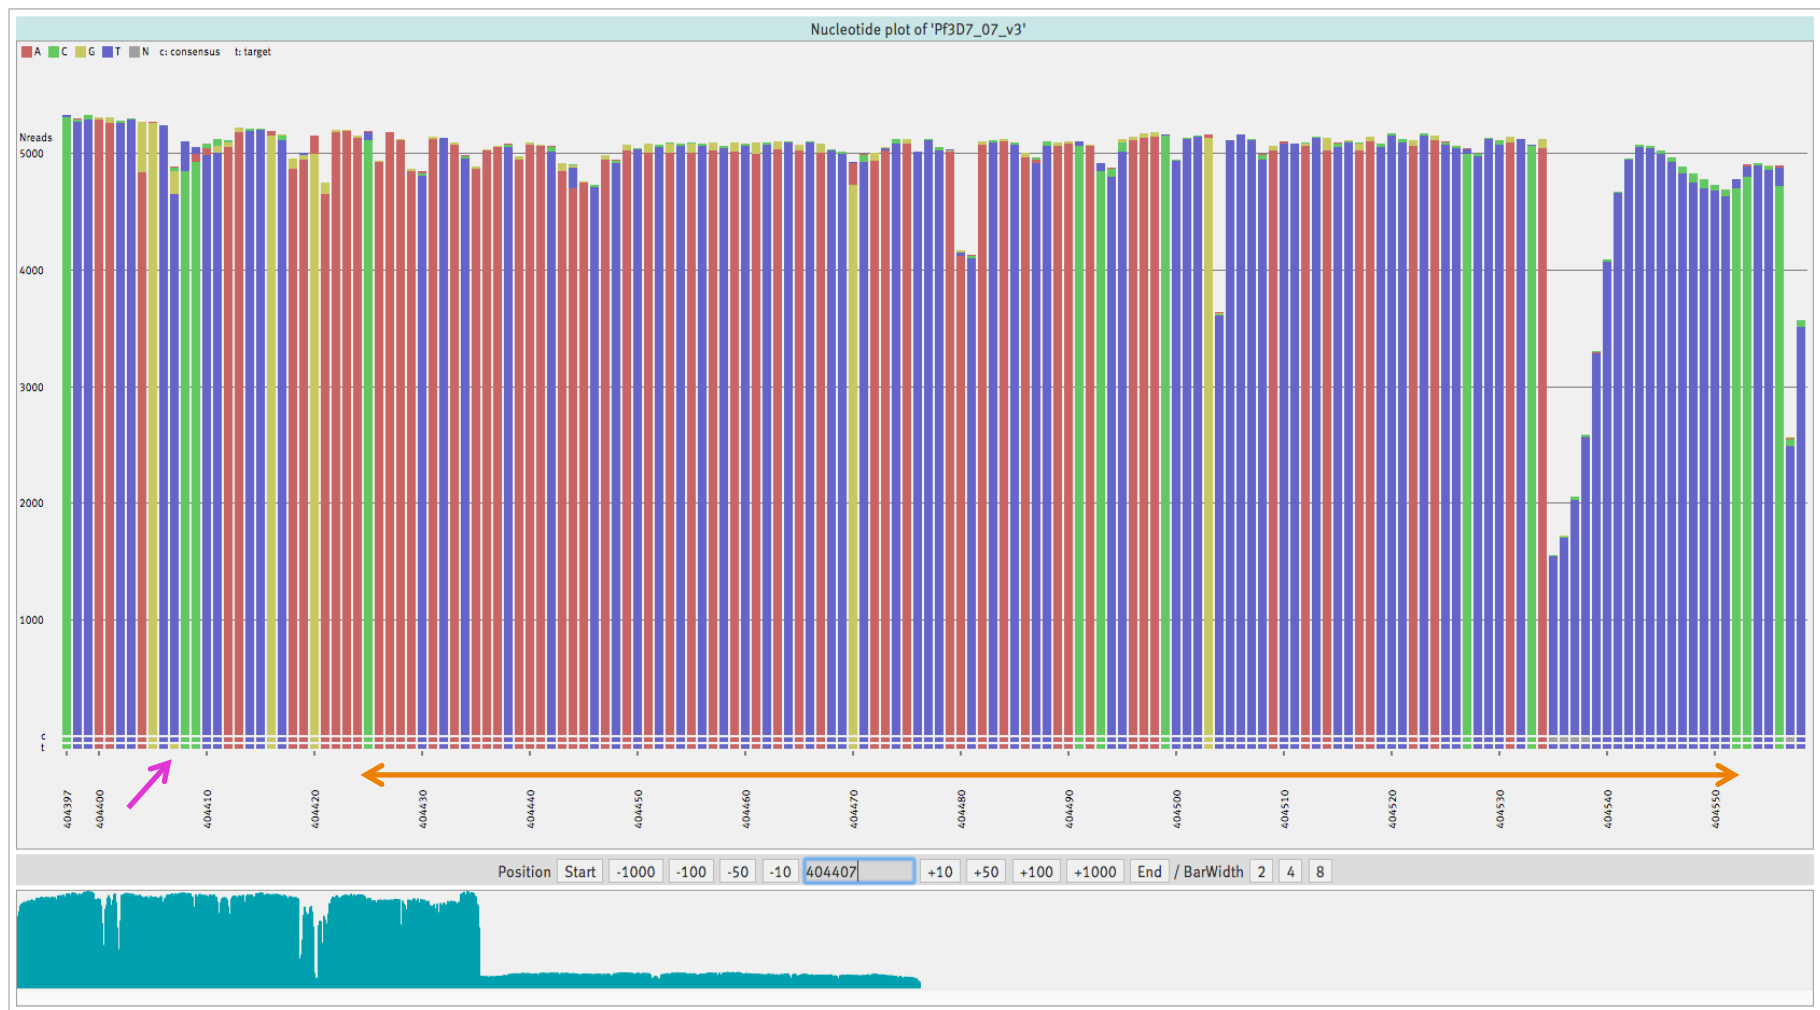



| Position | A   | C   | G   | T   | Target | Matches in dbSNP     | P-error (local alignment quality) | raw A  | raw C | raw G | raw T  |
|----------|-----|-----|-----|-----|--------|----------------------|-----------------------------------|--------|-------|-------|--------|
| 55173958 | -   | -   | 1.0 | -   | a      |                      | 0.0027                            | 104623 | 1304  | 38751 | 753    |
| 55181370 | 1.0 | -   | -   | -   | g      | rs1050171: G/A+G/C   | 0.0008                            | 114375 | 5449  | 75568 | 3831   |
| 55181378 | -   | -   | -   | 1.0 | c      | rs121434569: C/T     | 0.0007                            | 1423   | 65474 | 2980  | 128968 |
| 55191822 | -   | -   | 1.0 | -   | t      | rs121434568: T/A+T/G | 0.0013                            | 19653  | 10419 | 75524 | 59396  |
| 55192839 | -   | -   | 1.0 | -   | a      | rs376176117: A/T     | 0.0695                            | 70026  | 211   | 18566 | 37     |
| 55198724 | -   | 1.0 | -   | -   | t      | rs1140475: T/A+T/C   | 0.0563                            | 1723   | 72518 | 896   | 49645  |

B

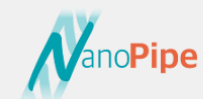

- About
- Usage
- Run the Pipeline
- View All Requests
- Contact
- Previous Runs / Views
- Aug-03: 153329145126221  
EGFR900Mb\_transcr
- Aug-30: 153562872991118  
plasmodium\_manuscript\_...
- Aug-30: 153564026999169  
C.maculatus\_manuscript\_...
- Aug-30: 153564269983433  
EGFR\_manuscript\_test2
- Aug-31: 1535738582988991  
EGFR\_against\_genome\_te...
- Sep-01: 153582075095246  
C.elegance\_test
- Sep-01: 153582083807254  
A.thaliana\_test
- Sep-01: 153582250811351  
C.elegance\_test2
- Sep-01: 153582283677398  
drosophila\_test
- Sep-02: 153589376551289  
EGFR\_genome

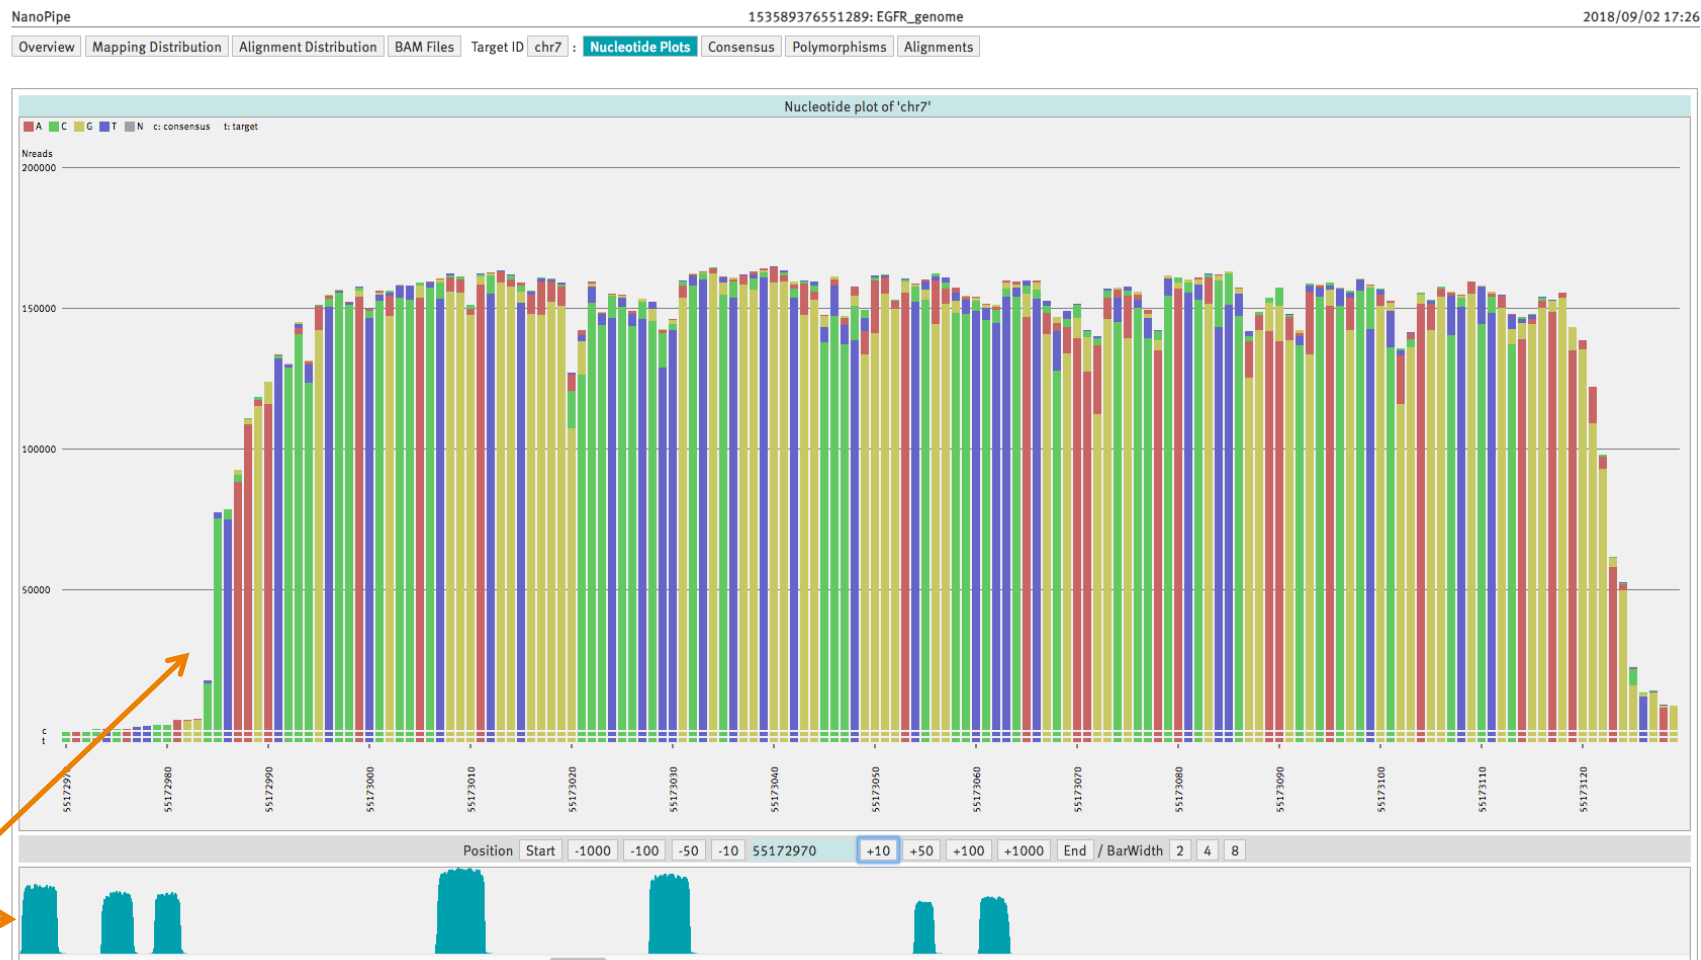

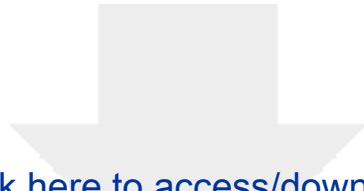

Click here to access/download

**Supplementary Material**

NanoPipe\_Supplementary.pdf

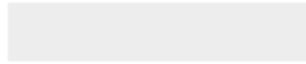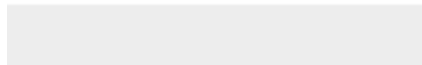

Supplement: giy169_giga-d-18-00394_revision_1.pdf [file giy169_giga-d-18-00394_revision_1.pdf]
