# Supplementary material for: NanoPipe—a web server for nanopore MinION sequencing data analysis
Source: PubMed Central journal article supplement (PMC6377397; doi:10.1093/gigascience/giy169), 2019-01-24
Supplement: giy169_reviewer_1_report_revision_1.pdf [file giy169_reviewer_1_report_revision_1.pdf]

## Reviewer Report

**Title:** NanoPipe - a web server for nanopore MinION sequencing data analysis

**Version:** Revision 1      **Date:** 12/13/2018

**Reviewer name:** Keith Robison

### Reviewer Comments to Author:

I am glad the authors found my comments helpful.

I re-tried the test case on two different platforms -- Chrome on a PC running at my workplace and Safari on an iPad Pro running over 4G -- both get the "Request is invalid or has already been deleted!" message (job is listed as 150391086568823 for the iPad job)

My job from the first review is still queued! 154333715321656

### Level of Interest

Please indicate how interesting you found the manuscript: Choose an item.

### Quality of Written English

Please indicate the quality of language in the manuscript: Choose an item.

### Declaration of Competing Interests

Please complete a declaration of competing interests, considering the following questions:

- Have you in the past five years received reimbursements, fees, funding, or salary from an organisation that may in any way gain or lose financially from the publication of this manuscript, either now or in the future?
- Do you hold any stocks or shares in an organisation that may in any way gain or lose financially from the publication of this manuscript, either now or in the future?
- Do you hold or are you currently applying for any patents relating to the content of the manuscript?
- Have you received reimbursements, fees, funding, or salary from an organization that holds or has applied for patents relating to the content of the manuscript?
- Do you have any other financial competing interests?
- Do you have any non-financial competing interests in relation to this paper?

If you can answer no to all of the above, write 'I declare that I have no competing interests' below. If your reply is yes to any, please give details below.

No competing interests

I agree to the open peer review policy of the journal. I understand that my name will be included on my report to the authors and, if the manuscript is accepted for publication, my named report including any attachments I upload will be posted on the website along with the authors' responses. I agree for my report to be made available under an Open Access Creative Commons CC-BY license (<http://creativecommons.org/licenses/by/4.0/>). I understand that any comments which I do not wish to be included in my named report can be included as confidential comments to the editors, which will not be published.

I agree to the open peer review policy of the journal
