# Supplementary material for: NanoPipe—a web server for nanopore MinION sequencing data analysis
Source: PubMed Central journal article supplement (PMC6377397; doi:10.1093/gigascience/giy169), 2019-01-24
Supplement: giy169_supplemental_file.pdf [file giy169_supplemental_file.pdf]

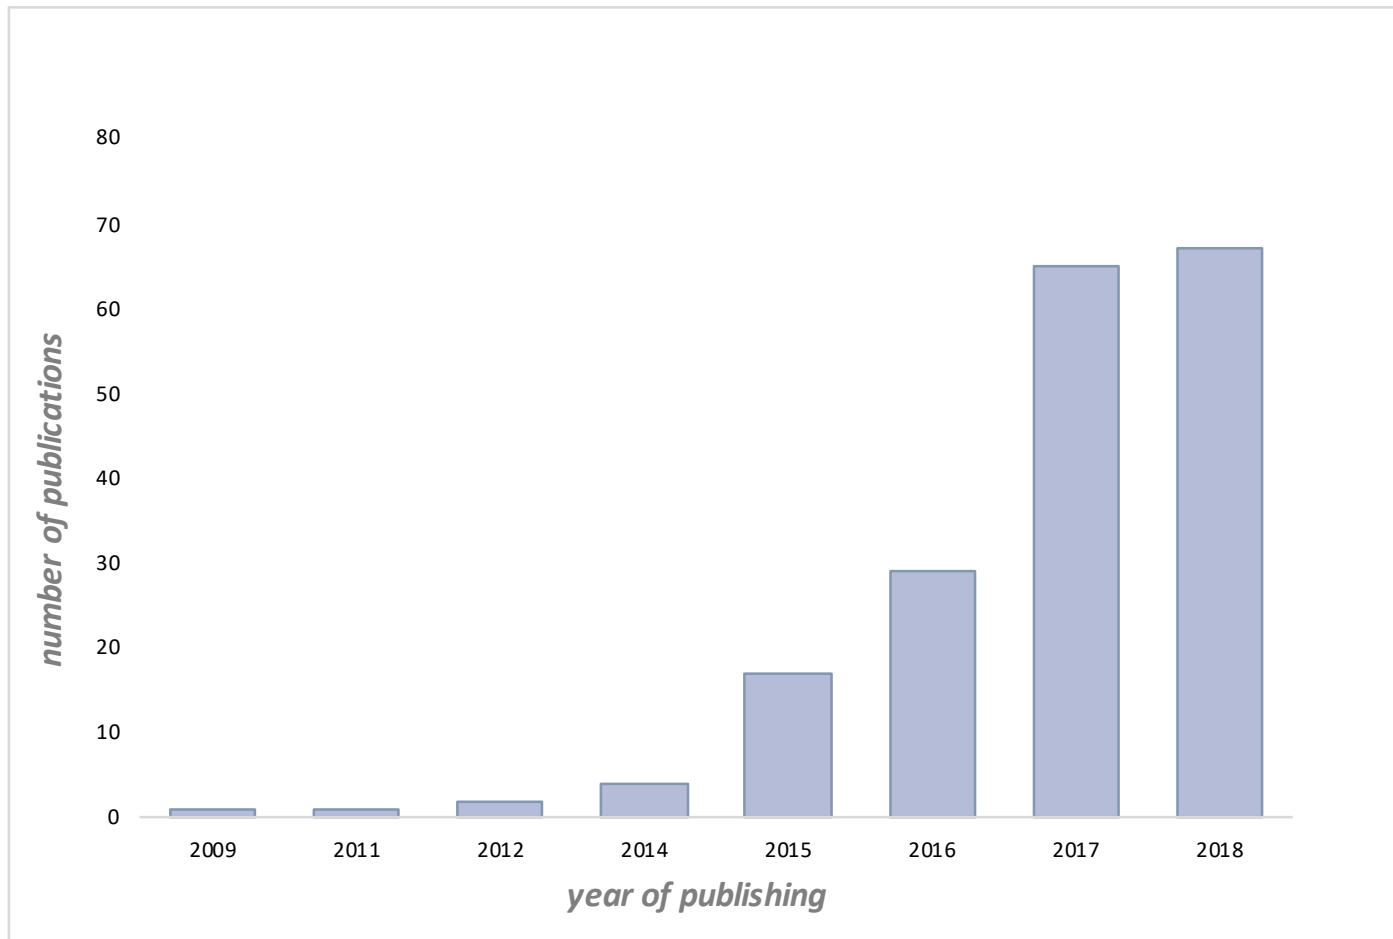

Figure S1. Number of scientific publications that contain the “Oxford Nanopore” phrase in their abstracts. Data were retrieved from the PubMed (<https://www.ncbi.nlm.nih.gov/pubmed/>) on 1.09.2018.

Statistics

Time: 207 seconds

Parameters

| Type   | Values                                                                                                                                                                                                                                                                                                                                           |
|--------|--------------------------------------------------------------------------------------------------------------------------------------------------------------------------------------------------------------------------------------------------------------------------------------------------------------------------------------------------|
| Target | Plasmodium falciparum genome                                                                                                                                                                                                                                                                                                                     |
| Last   | <pre># LAST version 923 # # a=15 b=3 A=15 B=4 e=139 d=95 x=138 y=44 z=138 D=1e+06 E=21429 # R=10 u=0 s=2 S=1 M=0 T=0 m=10 l=1 n=10 k=2 w=1000 t=4.40086 j=3 Q=0 # Reference sequences=16 normal letters=23332821 # lambda=0.21831 K=0.309523 # #   A   C   G   T # A  4 -15 -4 -22 # C -18 10 -20 -15 # G -8 -18  9 -18 # T -23 -11 -17  4</pre> |

Reads Summary

|                              |       |
|------------------------------|-------|
| Number of reads in the query | 10157 |
| Number of reads mapped       | 10155 |

\*Click on the column header to sort it ascending or descending...

| Target Name* | Reads Mapped*  |
|--------------|---------------------------------------------------------------------------------------------------|
| Pf3D7_07_v3  | 6286                                                                                              |
| Pf3D7_13_v3  | 3904                                                                                              |
| Pf3D7_12_v3  | 107                                                                                               |
| Pf3D7_11_v3  | 24                                                                                                |
| Pf3D7_05_v3  | 23                                                                                                |
| Pf3D7_08_v3  | 21                                                                                                |
| Pf3D7_06_v3  | 15                                                                                                |
| Pf3D7_10_v3  | 11                                                                                                |
| Pf3D7_04_v3  | 9                                                                                                 |
| Pf3D7_14_v3  | 7                                                                                                 |
| Pf3D7_03_v3  | 7                                                                                                 |
| Pf3D7_01_v3  | 6                                                                                                 |
| Pf3D7_09_v3  | 3                                                                                                 |
| Pf3D7_02_v3  | 1                                                                                                 |

Figure S2. Results page for *P. falciparum*. Overview.

Number of reads per target

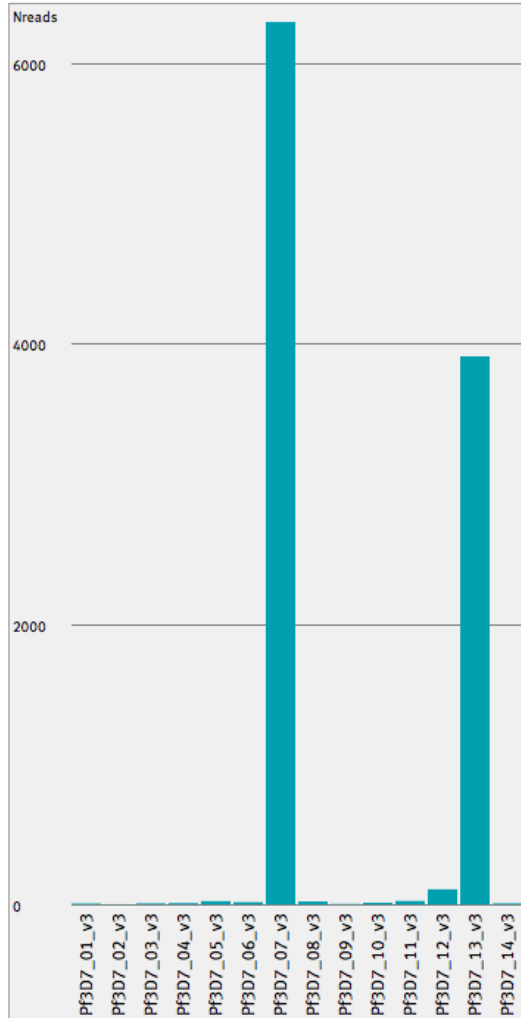

Figure S3. Results page for *P. falciparum*. Mapping distribution.

- About
- Usage
- Run the Pipeline
- View All Requests
- Contact
- Previous Runs / Views**

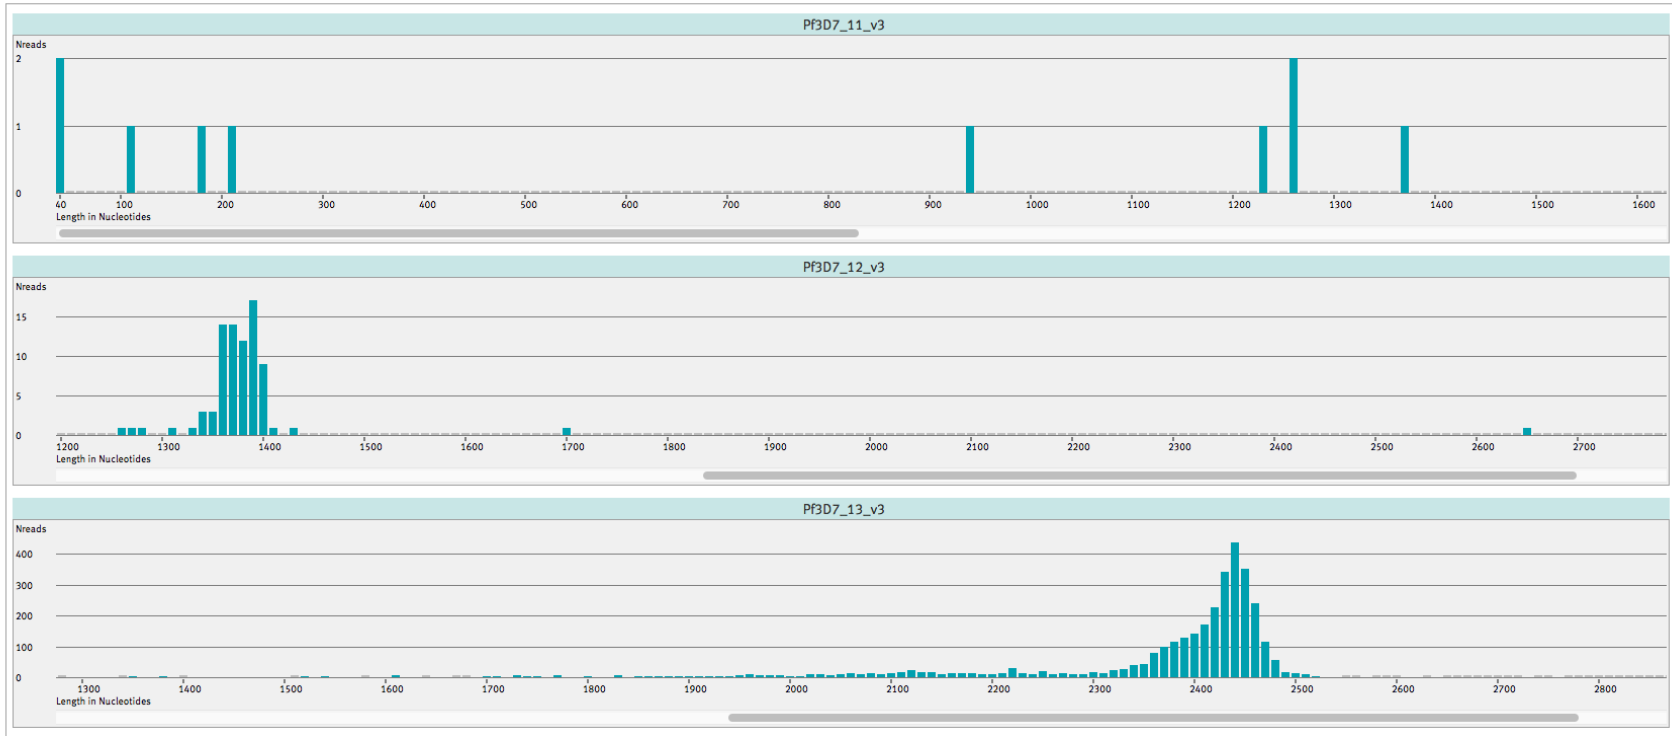

Figure S4. Results page for *P. falciparum*. Alignment distribution



- About
- Usage
- Run the Pipeline
- View All Requests
- Contact
- Previous Runs / Views**

**NanoPipe** **153789033639638: test\_case Plasmodium**

[Overview](#)
[Mapping Distribution](#)
[Alignment Distribution](#)
[BAM Files](#)
[Target ID](#)
PF3D7\_07\_v3 : 
 [Nucleotide Plots](#)
[Consensus](#)
[Polymorphisms](#)
[Alignments](#)

---

Here you can download the generated bam files to visualize the data on an external viewer on your computer

[Download Bam File](#)
[Download Bam Index File](#)
[Download Target Fasta File](#)

Figure S5. Results page for *P. falciparum*. BAM files.



- About
- Usage
- Run the Pipeline
- View All Requests
- Contact
- Previous Runs / Views**

**NanoPipe** **153789033639638: test\_case Plasmodium**

[Overview](#)
[Mapping Distribution](#)
[Alignment Distribution](#)
[BAM Files](#)
[Target ID](#)
PF3D7\_07\_v3 : 
 [Nucleotide Plots](#)
[Consensus](#)
[Polymorphisms](#)
[Alignments](#)

---

|             |
|-------------|
| PF3D7_07_v3 |
| PF3D7_12_v3 |
| PF3D7_13_v3 |

Figure S6. Results page for *P. falciparum*. Select target.

- About
- Usage
- Run the Pipeline
- View All Requests
- Contact
- Previous Runs / Views

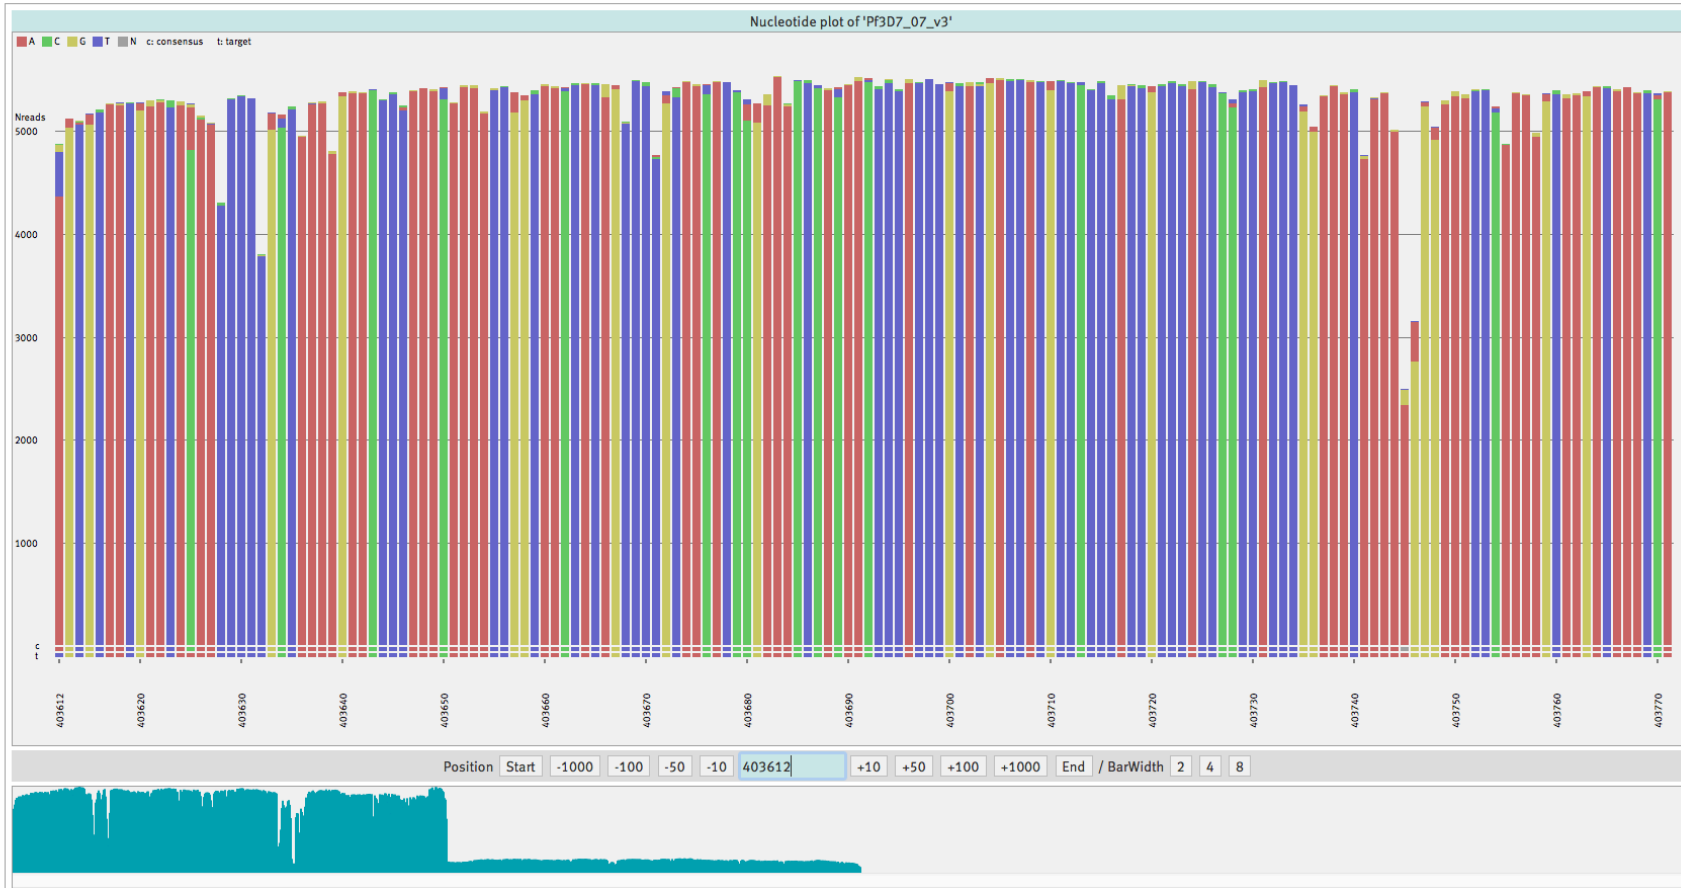

Figure S7. Results page for *P. falciparum*. Nucleotide plots.

Pf3D7\_07\_v3 (403086:404235)

```
>Pf3D7_07_v3 (403086:404235)
AATATTTTAAAAATCGACATTCGGATATATATATTTTAGACTATAATATCCGTTAATAATAAATACACCGCAGTCATATTTATTATACATTCATTTA
TTATTTTGTTTTTT-AAATTCACATATAACAAAAAGAAATTCGCAAGTAAAAAAAATAATCAAAAAAATCAAGCAAAAATGACGAGCGTTATAGAG
AATTAGATAAATTTAGTACAAGAAGGAGTAAGTATCCAAAAATGGAAATATGGAAATGATATAAATGAATAGATAAAATCAACCTATPGGATATATATAT
ATATATATATATATATATA-----GTATACCACATATGATTAATTTTTTTTTTTTTTTTTTTTTTTTTTTTTTTTT-----CCCTTGTCGACCPTA
ACAGATGGCTCACGTTTGGTGGAGGTTCTTGCTTGGTAAATGTGCTCATGTGTTAAACTTATTTTAAAGAGATTAAGGATAAATTTTTATTATA
TTTTAAGTATTATTATTAAAGTGTAAGTGAATGAACAATTTTTGCTAAAAAGACTTTAAACAAAATGGTAACATATAGTTTTGTAAACATCCGAAAC
TCACAACTTTATTGTATGATATGTTCTTTATTGTTTATTCCTTATTTGGAAATAAAA-GGGAAATCAAAAAGTAAAGATAAATCAATATATATAAAATGA
TGGATTTTATAAGAGAACTATCCACCTACCAATATAAAACATACACATATATATATATATATATAATATAATATAATATAATATATATATATATATATG
ATGTTGATTAATTTGTTTATATATTTATATTTATTCCTTATGACCTTTTTAGGAACGACACCGAAGCTTTAATTTACAATTTTTGCTATATCCATGTTA
GATGCCCTGTCAGTCATTTTGGCCTTCATAGGCTTACAAGAACACTGGAATAATCCAAATCATTGTTCTTCAATTAAGTATTCCTATAATATGTTCT
TCTGCTTTTTAATATAAGATATAGGTAAGTATACATTTTTAAATTTAC-----AAAAAAAAAAAAAAAAAAAAAAAAAAAAATATAAAATATA
TATA-----TATTATATATT-----TATTATTTATA
```

[Download](#)

Pf3D7\_07\_v3 (404260:406468)

```
>Pf3D7_07_v3 (404260:406468)
TTTATTTATTACTCC-TTTTAGATATCACCTTATACAATTATCTCGGAGCAGTTATTATTGTTGTAACAATAGCTCTTGTGAGAAAGAAATTATCTTTTG
AAACACAAGAAGAAAATTCATCATATTTAATCTTGCTTAAATAGTCCCTTAAATGTAAGAAAACAAAATATATAAATAAATAAATATATATATATA
TATATATATGTGAATATTTAATATATAATTAACACTTAAACTTTGTTTTTATTATATTAATTTATATCTTTATCA---TTTTTTTTTTTTTCCCTC-IT
TTTTTTTACCGCTGATGCTTTTCAAACATGACAAGGGAATAGTTTTTAAAAAATAAAGATGACATTTTAAAGATTAATGTAAGAAGAAAATATAAT
AATAAATAATATATATATATATATAATTTCCTTTTTACCAC--TTTTTTTTTTTATTCCTATAACGCATTATAATATTTCTGTTATTTTTATTCTT
ATAGGCTATGGTATCCCTTTTCCAATTTGTTCACTTCTTGTCTTATATATACCTGTATACACCTTCCATTTTTAAAAACAACGTAAGAAATTAATAGGAAAG
AAAAAATAAAATAAAATGAAATGTCACATATATATATATATATATATATATATATATATATATATATATATATATATATATATATATATATATATAT
GGACAAATATAAAAAATGGTTTCGCATGTTATTCTTGGGAAGAACACAGTCGTAGAGGTAAGAAATAGGATTTTCATTATATATAAAAAATACTACTTA
TTATGTTAATAAAAAAATATGTTTTTAATGTTCAATTTGTTTTTAAATTTATTTTTTTTTTTTTTTTTTTGTTTGTTCCTCTTCAGAAATGTGGTCTTGG
TATGGCTAAGTTATGTGATGATGTGACGGAGCATGGGTAAGAAGCTTATAATAAAAATTTCAAATAATAAGAGACATTATATATATTTTAAACAATAAT
AATTAATAAAAAAATAATATAATATATATATATATATATATATATATATATATATATATATATATATATATATATATATATATATATATATATATAT
TGACATATACTATTGTTAGTTGTATACAAGGTCAGCATTAGCAATTTGCTTATTACTTTAAATTTCTAGCCGTAAGAATTAAGAAATATAAATAATATA
AATATATATGGAATATATGATATATATATATATATATTTTTTATATGTAATGTTTTTTTTTTTTTTTCAACAATATACATTTAAATGTTTATGATGGTACA
ACGTATCATATTTTTATAAATAATTTTATGCAATCATGTATATTTTTTACTTTTTTAAATTTATAGGGTGATGTTGTAAGAGAACCAAGATATATAGATT
CGTAACTTTGGTAAAGTGTGAATTAAGAAATGAAATTTTTTTTTTTTTTTTTTTTATGAAACAAAATAATGTGATATAAATATGTGTGTAATACAAATGGCTT
GTTCTGTCATAAAATTTATATTTTTTTTTTTTTTTTTTTTTTTTTTTTTTTTACAGTTGGCTACCTATTTGGTCTATAAATTTACCGTGTAGGAAATA
TTATCTTAGAAAGTAAATACAAAAATAAGATAAAAAAATAAATATATAAATATGATATGTTCTTATATATTTTTGTTTATATATATATATATATATATAT
ATATA-TTTTATATTTCCATCTGCTTTTTATTCATTTGTTATAATTTATCATAAATTTTTTAAATTTGTTTACATTAGG-AAAAAATGAGAAATGA
AGAAAATGAAGATTCGAAAGGAGAAATTAACCAACGTCGATTCATTTATTAACAATAAAA-TATATCATTATTTTTTTATATTTTTTATATTTTTTTA
TTTTTATGTTTTTTTTTCTTTA-TTTTTTTTTTTTTTTTTTTTCC-TTTTTTTTTTAAATAAATCATTTCTTAATATTTATTTGCTATCGCATACACTTT
ATAAGGAAT
```

[Download](#)Figure S8. Results page for *P. falciparum*. Consensus sequence.

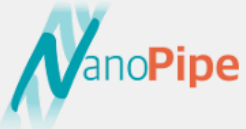

- About
- Usage
- Run the Pipeline
- View All Requests
- Contact
- Previous Runs / Views**

| Position | A   | C   | G | T   | Target | Matches in PlasmoDB                            | P-error (local alignment quality) | raw A | raw C | raw G | raw T |
|----------|-----|-----|---|-----|--------|------------------------------------------------|-----------------------------------|-------|-------|-------|-------|
| 403612   | 1.0 | -   | - | -   | t      | NGS_SNP.Pf3D7_07_v3.403612:<br>T:0.98 + A:0.02 | 0.0061                            | 4363  | 13    | 76    | 440   |
| 403625   | -   | 1.0 | - | -   | a      | NGS_SNP.Pf3D7_07_v3.403625:<br>C:0.65 + A:0.35 | 0.0068                            | 419   | 4817  | 31    | 18    |
| 404407   | -   | -   | - | 1.0 | g      | NGS_SNP.Pf3D7_07_v3.404407:<br>T:0.72 + G:0.28 | 0.0036                            | 16    | 37    | 200   | 4650  |

Figure S9. Results page for *P. falciparum*. Polymorphisms.



- About
- Usage
- Run the Pipeline
- View All Requests
- Contact
- Previous Runs / Views**

Pf3D7\_07\_v3 (403086:404235)

Nucleotids=1150, Identity=1094 (95.1%), Gaps=56 (4.9%) N=0 (0.0%)

|               |                                                                                                       |                      |
|---------------|-------------------------------------------------------------------------------------------------------|----------------------|
| Query         |                                                                                                       | AATATTTTAAAAATCG<br> |
| 403086 Target |                                                                                                       | AATATTTTAAAAATCG     |
| Query         | ACATTCGGATATATTATATTTTGTAGACTATAATATCCGTTAATAATAAAATACACGCAGTCATATATTTATTATACATTCATTTATTATTTGTTTTTTTT |                      |
| 403101 Target | ACATTCGGATATATTATATTTTGTAGACTATAATATCCGTTAATAATAAAATACACGCAGTCATATATTTATTATACATTCATTTATTATTTGTTTTTTTT |                      |
| Query         | -AATTTCTTACATATAACAAAATGAAATTCGCAAGTAAAAAAAATTAATCAAAAAAATCAAGCAAAAATGACGAGCGTTATAGAGAATTAGATAATTTAG  |                      |
| 403201 Target | TAATTTCTTACATATAACAAAATGAAATTCGCAAGTAAAAAAAATTAATCAAAAAAATCAAGCAAAAATGACGAGCGTTATAGAGAATTAGATAATTTAG  |                      |
| Query         | TACAAGAAGGAAGTAAGTATCCAAAATGGAATATGGAATGATATAAATGAATAGATAAAATCAACCTATTGGATATATATATATATATATATATATA     |                      |
| 403301 Target | TACAAGAAGGAAGTAAGTATCCAAAATGGAATATGGAATGATATAAATGAATAGATAAAATCAACCTATTGGATATATATATATATATATATATATA     |                      |
| Query         | TATATA-----GTATACCCATATGTATTAATTTTTTTTTTTTTTTTTTTTTTTTTTTTTTTT-----CCCTTGTGACCTTAACAGATGGCTCACGT      |                      |
| 403401 Target | TATATATATATATGTATACCCATATGTATTAATTTTTTTTTTTTTTTTTTTTTTTTTTTTTTTTCCCTTGTGACCTTAACAGATGGCTCACGT         |                      |
| Query         | TTAGGTGGAGGTTCTTGTCTTGGTAAATGTGCTCATGTGTTAAACTTATTTTTAAAGAGATTAAGGATAATATTTTTATTTATATTTTAAAGTATTATT   |                      |

Pf3D7\_07\_v3 (404260:406468)

Nucleotids=2209, Identity=2191 (99.2%), Gaps=18 (0.8%) N=0 (0.0%)

|               |                                                                                                      |                                              |
|---------------|------------------------------------------------------------------------------------------------------|----------------------------------------------|
| Query         |                                                                                                      | TTTATTTATTACTCC-TTTTAGATATCACTTATACAATTA<br> |
| 404260 Target |                                                                                                      | TTTATTTATTACTCCTTTTTAGATATCACTTATACAATTA     |
| Query         | TCTCGGAGCAGTTATTATGTTGTAACAATAGCTCTTGTAGAAATGAAATATCTTTTGAAACACAAGAAGAAAATCTATCATATTTAATCTTGTCTTA    |                                              |
| 404301 Target | TCTCGGAGCAGTTATTATGTTGTAACAATAGCTCTTGTAGAAATGAAATATCTTTTGAAACACAAGAAGAAAATCTATCATATTTAATCTTGTCTTA    |                                              |
| Query         | ATTAGTTCCTTAATTGTAAGAAAACAAAATATATAAAATAAATAAATATATATATATATATATATATATTGTAATATTAAATATATTTAACACTTAAACT |                                              |
| 404401 Target | ATTAGTTCCTTAATTGTAAGAAAACAAAATATATAAAATAAATAAATATATATATATATATATATATTGTAATATTAAATATATTTAACACTTAAACT   |                                              |
| Query         | TTGTTTTTATTATATTAATTTATATCTTTATCA----TTTTTTTTTTTTTCCCTC-TTTTTTTTAGCCTGTATGCTTTTCAAACATGACAAGGAAAAT   |                                              |
| 404501 Target | TTGTTTTTATTATATTAATTTATATCTTTATCAATTTTTTTTTTTTTTTTCCCTCCTTTTTTTTAGCCTGTATGCTTTTCAAACATGACAAGGAAAAT   |                                              |
| Query         | AGTTTTTAAAAAATATAAGATTGACATTTAAGATTAAGTAAAGTAAAGAAAATATAAATAAATAAATATATATATATATATATTTCCCTTTTTTACC    |                                              |
| 404601 Target | AGTTTTTAAAAAATATAAGATTGACATTTAAGATTAAGTAAAGTAAAGAAAATATAAATAAATAAATATATATATATATATATTTCCCTTTTTTACC    |                                              |
| Query         | AC--TTTTTTTTTTTATCCTATAACGCATTATAATTTCTGTTATTTTTATTTCTTATAGGCTATGGTATCCTTTTCCAATGTTCACTTCTTGTCT      |                                              |

Figure S10. Results page for *P. falciparum*. Alignments.
